# Supplementary material for: Why has adolescent smoking declined dramatically? Trend analysis using repeat cross-sectional data from New Zealand 2002–2015
Source: PubMed Central journal article supplement — BMJ Open. 2018 Oct 25;8(10):e020320. doi: 10.1136/bmjopen-2017-020320 (PMC6224735; doi:10.1136/bmjopen-2017-020320), 2018-10-25
Supplement: bmjopen-2017-020320.draft_revisions.pdf [file bmjopen-2017-020320.draft_revisions.pdf]

# BMJ Open

BMJ Open is committed to open peer review. As part of this commitment we make the peer review history of every article we publish publicly available.

When an article is published we post the peer reviewers' comments and the authors' responses online. We also post the versions of the paper that were used during peer review. These are the versions that the peer review comments apply to.

The versions of the paper that follow are the versions that were submitted during the peer review process. They are not the versions of record or the final published versions. They should not be cited or distributed as the published version of this manuscript.

BMJ Open is an open access journal and the full, final, typeset and author-corrected version of record of the manuscript is available on our site with no access controls, subscription charges or pay-per-view fees (<http://bmjopen.bmj.com>).

If you have any questions on BMJ Open's open peer review process please email [editorial.bmjopen@bmj.com](mailto:editorial.bmjopen@bmj.com)

# BMJ Open

**Why has adolescent smoking declined dramatically? An investigation of changing exposure to risk factors using analysis of repeat cross-sectional data from New Zealand 2002-2015.**

|                               |                                                                                                                                                                                                                                                    |
|-------------------------------|----------------------------------------------------------------------------------------------------------------------------------------------------------------------------------------------------------------------------------------------------|
| Journal:                      | <i>BMJ Open</i>                                                                                                                                                                                                                                    |
| Manuscript ID                 | bmjopen-2017-020320                                                                                                                                                                                                                                |
| Article Type:                 | Research                                                                                                                                                                                                                                           |
| Date Submitted by the Author: | 27-Oct-2017                                                                                                                                                                                                                                        |
| Complete List of Authors:     | Ball, Jude; University of Otago, Wellington, Department of Public Health; University of Otago, Wellington<br>Sim, Dalice; University of Otago, Wellington, Dean's Department<br>Edwards, Richard; University of Otago, Department of Public Health |
| Keywords:                     | PAEDIATRICS, PREVENTIVE MEDICINE, PUBLIC HEALTH, EPIDEMIOLOGY                                                                                                                                                                                      |
|                               |                                                                                                                                                                                                                                                    |

SCHOLARONE™  
Manuscripts

1  
2  
3  
4  
5  
6  
7  
8 **Why has adolescent smoking declined dramatically? An investigation of changing**  
9 **exposure to risk factors using analysis of repeat cross-sectional data from New Zealand**  
10 **2002-2015.**  
11

12  
13  
14 **Corresponding author:**

15 Jude Ball

16 Public Health Department,

17 University of Otago, Wellington

18 PO Box 7343, Newtown, Wellington 6242

19 New Zealand

20 Email: [jude.ball@otago.ac.nz](mailto:jude.ball@otago.ac.nz)

21 Phone: ++64 21 544 207  
22  
23  
24  
25  
26  
27  
28  
29  
30

31 **Co-authors:**

32 Dr Dalice Sim

33 Dean's Department, University of Otago, Wellington

34 Wellington, New Zealand  
35  
36  
37  
38  
39  
40

41 Prof Richard Edwards

42 Department of Public Health, University of Otago, Wellington

43 Wellington, New Zealand  
44  
45  
46  
47  
48  
49  
50

51 **Word Count: 3, 436**  
52  
53  
54  
55  
56  
57  
58  
59  
60

## ABSTRACT

**Objectives:** Adolescent smoking has declined in New Zealand and in many other developed countries since the late 1990s, yet the drivers of the decline are not well understood. We set out to determine i) whether changes in exposure to known risk factors account for the decline, ii) whether relationships between risk factors and smoking outcomes have changed over time.

**Design:** Analysis of repeat cross-sectional data from a nationally representative survey.

**Setting:** New Zealand

**Participants:** Secondary school students aged 14-15. N=20,443 - 31,833 per year.

**Outcome measure:** Regular (at least monthly) smoking

**Methods:** We analysed smoking prevalence and exposure to risk factors (one or more parents smoke, best friend smokes, older sibling(s) smoke, and past week exposure to smoking in the home), 2002-2015. For each risk factor we calculated annual average change in exposure, and odds ratios (OR) for each year, overall and for Māori.

**Results:** There were declines in adolescent smoking (absolute annual average decrease 1.2%), exposure to best friend smokes (1.5%), older sibling smokes (0.7%), daily exposure to smoking in the home (0.6%), maternal (0.5%) and paternal (0.5%) smoking. The adjusted OR for exposure to smoking in the home and best friend smokes increased markedly over the study period while the OR for parental smoking remained unchanged and was not a significant independent risk factor in most years. Trends were similar overall and for Māori.

**Conclusions:** Changes in parental smoking do not account for smoking decline among adolescents. Decreasing exposure to daily smoking in the home and older sibling smoking

1  
2  
3 have likely contributed. Smoking status of best friend remains the strongest risk factor, with  
4 exposure falling dramatically at the individual level, in line with population declines in  
5 adolescent smoking since 2002. Further research is needed to identify additional factors,  
6  
7 outside our model, that appear to be driving this trend.  
8  
9  
10

## 11 **ARTICLE SUMMARY**

### 12 **Strengths and limitations of this study**

- 13  
14  
15  
16  
17 • The study is original because little research has explored explanations for the decline  
18 in adolescents smoking, examined trends in exposure to risk factors for adolescent  
19 smoking, or investigated the changing relationship between risk factors and smoking  
20 outcomes over time.  
21  
22
- 23 • The survey has a large sample size (N=20,443 - 31,833 per year), allowing accurate  
24 population estimates of smoking prevalence and exposure to risk factors.  
25
- 26 • Due to data limitations, the study only includes a small number of risk factors.  
27
- 28 • However the risk factors included have consistently been found to be among the  
29 strongest and most important predictors of adolescent smoking.  
30  
31  
32  
33  
34  
35  
36  
37  
38  
39  
40

## 41 **INTRODUCTION**

42 Smoking is a leading cause of preventable illness and premature death<sup>1</sup> and a key driver of  
43 health disparities between ethnic and socioeconomic groups.<sup>2,3</sup> Long-term tobacco use  
44 typically begins with experimental smoking in adolescence,<sup>4</sup> and, internationally,  
45 considerable research and policy attention has focused on understanding and preventing  
46 smoking uptake in this age group.  
47  
48  
49  
50  
51  
52  
53  
54  
55  
56  
57  
58  
59  
60

1  
2  
3 The dramatic decline in adolescent smoking observed since the late 1990s in many high  
4 income countries is good news from a public health perspective. In New Zealand (NZ), for  
5 example, regular smoking (defined as at least monthly) among 14-15 year olds declined from a  
6 peak of 29% in 1999 to 6% in 2014, with decreases across all main ethnic and socioeconomic  
7 groups, and a convergence between boys and girls over the period.<sup>5</sup> However, as in other  
8 countries, ethnic disparities remain pronounced with Māori (indigenous) smoking prevalence in  
9 this age group at 13.2% compared 4.2% among non-Māori in 2014.<sup>6</sup> In the context of such  
10 marked disparities, understanding the drivers of smoking decline among Māori adolescents is  
11 particularly important, to inform policies and programmes aimed at further reducing smoking  
12 in this priority group.  
13  
14  
15  
16  
17  
18  
19  
20  
21  
22  
23  
24  
25

26 Other countries including the USA, England and Australia have also experienced a decline in  
27 teen smoking from the late 1990s, following a sharp rise in the early 1990s.<sup>7</sup> It is important to  
28 understand the causes of this decline in order to help ensure it is sustained, and to enable  
29 replication in other countries. Yet little research has focused on explaining this phenomenon.  
30 Public health interventions such as increases in tobacco tax or smokefree environment  
31 legislation may have played a role,<sup>8-10</sup> but they do not fully explain the observed trends, since  
32 declines in adolescent smoking have occurred in countries with widely differing regulatory  
33 contexts. This, and the fact that other adolescent risk behaviours (e.g. alcohol use, teen  
34 pregnancy) have also declined over a similar time period,<sup>7</sup> suggests broader socio-cultural  
35 changes rather than specific tobacco control policies may contribute to this international trend.  
36  
37  
38  
39  
40  
41  
42  
43  
44  
45  
46  
47  
48

49 Such shifts could be generated by new technologies, for example. When the use of cell phones  
50 rose and smoking fell among adolescents in the late 1990s, a causal association was  
51 hypothesised.<sup>11</sup> More recently, attention has turned to other new technologies – smartphones  
52 and social media - and their potential role in driving generational change in attitudes and  
53  
54  
55  
56  
57  
58  
59  
60

1  
2  
3 behaviour.<sup>12</sup> There is face validity to the idea that these new technologies may have changed  
4 the way young people socialise or project their identity, displacing the role of smoking or  
5 providing less opportunity for it. However, this hypothesis is challenged by a consistent body  
6 of evidence showing a *positive* association between smoking and cell phone/ internet/social  
7 media use at the individual level.<sup>13-22</sup>  
8  
9  
10  
11  
12

13  
14 Other major changes since the mid-90s that could potentially impact on youth behaviour  
15 include changes in parenting;<sup>23-25</sup> changes in the school environment and climate;<sup>26-28</sup> and  
16 broad economic and labour market conditions resulting in young people leaving school and  
17 achieving independence later than previous cohorts.<sup>29 30</sup> But before exploring these novel  
18 explanations for smoking decline, it is important to determine the extent to which the observed  
19 trends can be explained by changing exposure to known predictors of smoking initiation.  
20  
21  
22  
23  
24  
25  
26  
27

28 Proximal risk factors for adolescent smoking have been studied extensively. For example  
29 parental, sibling and peer smoking have consistently been identified as key risk factors,<sup>4 31</sup> with  
30 the Surgeon General's 2012 review concluding that the evidence is suggestive of a causal role  
31 for peer influences, and a potential causal role for parental smoking.<sup>4</sup> The review found that  
32 smoking by older siblings influences smoking in adolescents more consistently than does  
33 smoking by parents.<sup>4</sup> Exposure to smoking in the home, although a less studied factor, has also  
34 been shown to be strongly related to the likelihood of smoking in adolescents independent of  
35 parental smoking status.<sup>32-36</sup> Studies suggest second hand smoke exposure may biologically  
36 predispose children to nicotine dependence<sup>37-41</sup> in addition to providing pro-smoking  
37 socialization.<sup>33</sup>  
38  
39  
40  
41  
42  
43  
44  
45  
46  
47  
48  
49  
50  
51  
52

53 Despite extensive risk factor research, few studies have explored how exposure to risk factors  
54 has changed over time, whether the relationships between established risk factors and outcomes  
55  
56  
57

1  
2  
3 have changed over time, or how such changes may be contributing to changes in adolescent  
4 smoking at the population level. Assuming that an observed individual-level relationship  
5 between a risk factor and adolescent smoking is causal, then declining exposure to that risk  
6 factor over time at the population level (while the strength of association is maintained or  
7 increased at the individual level) must contribute to a population decline in adolescent smoking.  
8  
9

10  
11  
12  
13  
14 The current study explores trends in exposure of 14-15 year olds to key risk factors – parental,  
15 sibling and peer smoking and exposure to smoking in the home - and their relationship to  
16 adolescent smoking from 2002 to 2015 in New NZ. We sought to better understand the  
17 potential drivers of adolescent smoking decline, overall and for Māori. Our study also updates  
18 regular smoking trends (overall, and by ethnicity) using 2015 data.  
19  
20  
21  
22  
23  
24

## 25 26 **METHODS**

27  
28 We analysed repeat cross-sectional data from the ASH Year 10 Snapshot Survey series, an  
29 annual school-based survey of 14-15 year olds in NZ, which is part of the New Zealand  
30 Youth Tobacco Monitor. The questionnaire includes a set of ‘core’ questions that have  
31 remained consistent over time to enable trend monitoring, and additional questions which  
32 change from year to year. Years included in the current study were 2002-2015, since key  
33 variables of interest were unavailable prior to 2002. Furthermore, exposure to smoking in the  
34 home was not included in the questionnaire in 2002 or 2004-5, and therefore multivariable  
35 analysis includes only data from 2003 and 2006-15.  
36  
37  
38  
39  
40  
41  
42  
43  
44  
45

46 The ASH Year 10 Snapshot is a census-style survey, meaning all public and private schools  
47 with Year 10 students are eligible and invited to participate each year. School response rates  
48 range from 44-67% ,<sup>42</sup> and overall response rates from 36% to 54% (Table 1). The sample  
49 (N=20,000 – 32,000 per year) comprises approximately half the Year 10 population each  
50 year, and closely resembles the Year 10 population, albeit with modest but consistent under-  
51  
52  
53  
54  
55  
56  
57  
58  
59  
60



representation of Māori and low decile students. Detailed comparison of the sample and population by year is available in a supplementary file.

*Table 1. Sample size and student response rate by year*

| Year         | NZ Year 10 population | Valid responses included in study | % Year 10 population included in study |
|--------------|-----------------------|-----------------------------------|----------------------------------------|
| 2002         | 58,812                | 28,088                            | 50%                                    |
| 2003         | 61,028                | 31,377                            | 54%                                    |
| 2004         | 62,852                | 30,807                            | 46%                                    |
| 2005         | 64,619                | 31,833                            | 51%                                    |
| 2006         | 63,086                | 31,690                            | 52%                                    |
| 2007         | 62,012                | 25,109                            | 42%                                    |
| 2008         | 61,485                | 29,682                            | 50%                                    |
| 2009         | 61,355                | 24,755                            | 42%                                    |
| 2010         | 61,210                | 31,696                            | 54%                                    |
| 2011         | 59,562                | 26,028                            | 45%                                    |
| 2012         | 59,627                | 30,396                            | 43%                                    |
| 2013         | 57,929                | 27,014                            | 49%                                    |
| 2014         | 59,612                | 29,303                            | 47%                                    |
| 2015         | 59,528                | 20,443                            | 36%                                    |
| <b>Total</b> | <b>852,717</b>        | <b>398,221</b>                    | <b>47%</b>                             |

Aside from changes to non-core questions, the method for the survey has been reasonably consistent across included years. However fieldwork was undertaken earlier in the year in 2011 and subsequently, meaning respondents were slightly younger on average in 2011 and subsequent years, than in 2010 and prior years.

In participating schools, the one-page survey is completed in class time under the supervision of teaching staff. Individual students may choose not to participate. To protect the confidentiality of students' responses, identifying information is not collected, and teachers are requested not to check the completed surveys. Completed surveys are returned to ASH, which oversees data entry, cleaning and coding.

1  
2  
3 The survey was approved, as a component of the NZ Youth Tobacco Monitor, by the  
4 Ministry of Health Multiregional Health and Disability Ethics Committee in 2007. Further  
5 details on survey methodology are available elsewhere.<sup>42</sup>  
6  
7  
8  
9

## 10 **Variables**

11  
12 The outcome variable, 'regular smoking' (Y/N) was defined as smoking at least monthly,  
13 based on the question 'How often do you smoke now?'

14  
15  
16  
17 Smoking status of mother, father, older sibling(s), and best friend were based on the question  
18 'Which of the following people smoke?' with a dichotomous variable (current smoker,  
19 yes/no) created for each. In addition, parental smoking was grouped into one variable for the  
20 purposes of multivariable analysis, coded 0 = neither parent smokes, 1 = only mother smokes,  
21 2 = only father smokes, 3 = both parents smoke.  
22  
23  
24  
25  
26  
27

28  
29 Past week exposure to smoking in the home was based on the question 'During the past 7  
30 days, on how many days have people smoked around you in your home?' Response  
31 categories were 0 days, 1-2 days, 3-4 days, 5-6 days and 7 days. 'Daily exposure' was  
32 defined as 7 days, while 'any exposure' was defined as 1-7 days.  
33  
34  
35  
36  
37  
38

39 Demographic variables were age (14 or 15 years old), sex (male or female), ethnicity  
40 (prioritised Māori, Pacific, Asian, NZ European/other (NZE0); and dichotomised into Māori  
41 and non-Māori) and school decile. School decile is a school-level measure of the socio-  
42 economic position of a school's student community.<sup>43</sup> We grouped school decile into low  
43 (deciles 1-3: most deprived), medium (4-7), and high (8-10: least deprived). Each school also  
44 had an identification number (school ID) which was assigned to all respondents from that  
45 school.  
46  
47  
48  
49  
50  
51  
52  
53

## 54 **Analysis**

1  
2  
3 Following previously published ASH analyses, analysis was restricted to respondents aged 14  
4 or 15 at the time of the survey. For consistency between univariate and multivariable  
5 (adjusted) analyses, only respondents with complete data for all variables (smoking status,  
6 parental smoking, sibling smoking, best friend smoking, age, gender, ethnicity, school decile,  
7 and school ID) were included in the analyses. In addition, only schools with at least 20  
8 respondents were included.  
9  
10  
11  
12  
13  
14

15  
16 We used SPSS (IBM Corp. Released 2016. IBM SPSS Statistics for Windows, Version 24.0.  
17 Armonk, NY: IBM Corp.) to tabulate prevalence of regular smoking and prevalence of  
18 exposure to risk factors (overall and by sex, ethnicity and school decile) for each year. We  
19 then quantified the mean annual absolute change in proportion of respondents exposed to  
20 each risk factor using weighted linear regression with year as the independent variable. The  
21 weights were  $1/SD^2$  of the proportions.  
22  
23  
24  
25  
26  
27  
28  
29

30 Logistic regression (PROC Glimmix) using SAS/STAT software, (Version 9.4 of the SAS  
31 system for Windows. Copyright © 2002-2012, SAS Institute Inc., Cary, NC, USA.) was  
32 used to calculate univariate odds ratios (OR) to determine the strength of the relationship  
33 between each risk factor and regular smoking for each year, overall and for Māori. To adjust  
34 for potential clustering at the school level, school ID was entered as a random effect in the  
35 estimation of odds ratios. Multivariable logistic regression analysis (again with a random  
36 effect of school) was then conducted to assess the independent influence of each risk factor  
37 on regular smoking for each year, overall and for Māori, adjusting for sex, age, school decile  
38 and the other risk factors in the model.  
39  
40  
41  
42  
43  
44  
45  
46  
47  
48  
49

## 50 **RESULTS**

### 51 **Prevalence of regular smoking**

52  
53  
54  
55  
56  
57  
58  
59  
60

1  
2  
3 We found that the long-term decline in prevalence of regular smoking among 14-15 year olds  
4 continued in 2015, to 5.4% overall (Fig 1a), and 11.1% for Māori (Fig 1b). Based on  
5 weighted linear regression, the overall regular smoking rate reduced by an average of 1.2 %  
6 per year (in absolute terms) from 2002-2015.  
7  
8  
9  
10

### 11 **Changes in exposure to risk factors over time**

12  
13  
14  
15 Trends in exposure to risk factors are shown in Figure 1. Parental smoking (Fig 1a and 1b)  
16 declined only modestly over the study period, compared with the marked decline in regular  
17 smoking in 14-15 year olds; maternal and paternal smoking both declined by an average rate  
18 of 0.5% per annum. As shown in Figures 1b and 1c, smoking among older siblings declined  
19 slightly more, at an average rate of 0.7% per annum, but only 'best friend smokes' declined at  
20 a similar rate to regular smoking in 14-15 year olds (1.5% per annum). The change in  
21 exposure to smoking in the home (1-7 days) over the study period was not statistically  
22 significant, but daily (7 day) exposure fell from 22% to 13% overall (an average decrease of  
23 0.6% per annum), and 38% to 25% for Māori. For Māori, trends in exposure to risk factors  
24 follow a similar pattern to overall trends but at markedly higher levels of exposure, as shown  
25 in Figures 1b and 1d.  
26  
27  
28  
29  
30  
31  
32  
33  
34  
35  
36  
37  
38  
39

### 40 **Changes in the relationship between risk factors and regular smoking over time**

41  
42  
43 As shown in Table 2, univariate analysis confirmed that smoking status of best friend, older  
44 sibling(s), and parents were all significant risk factors for smoking in 14-15 year olds in 2003  
45 and 2015 at the individual level (overall and for Māori), as was exposure to smoking in the  
46 home. After adjusting for age, sex, school decile and risk factors in the model, strong and  
47 statistically significant associations with smoking status of best friend and older sibling(s)  
48 and exposure to smoking in the home persisted, but parental smoking had only a weak or  
49 non-significant association with the likelihood of regular smoking.  
50  
51  
52  
53  
54  
55  
56  
57  
58  
59  
60

1  
2  
3  
4  
5  
6  
7  
8  
9  
10  
11  
12  
13  
14  
15  
16  
17  
18  
19  
20  
21  
22  
23  
24  
25  
26  
27  
28  
29  
30  
31  
32  
33  
34  
35  
36  
37  
38  
39  
40  
41  
42  
43  
44  
45  
46  
47

Table 2: Odds ratios for regular smoking among adolescents, 2003 and 2015, overall and for Māori.

|                                                 | 2003                       |                         |                     | 2015                       |                         |                     |
|-------------------------------------------------|----------------------------|-------------------------|---------------------|----------------------------|-------------------------|---------------------|
|                                                 | OVERALL                    |                         |                     |                            |                         |                     |
|                                                 | N=31,377                   |                         |                     | N=20,443                   |                         |                     |
|                                                 | Prevalence of exposure (%) | Odds ratio (unadjusted) | Adjusted Odds Ratio | Prevalence of exposure (%) | Odds Ratio (unadjusted) | Adjusted Odds Ratio |
| No exposure to smoking in the home (0 days)     | 70.2                       | 1.0                     | 1.0                 | 71.2                       | 1.0                     | 1.0                 |
| Daily exposure to smoking in the home           | 21.6                       | 3.8 (3.6-4.1)           | 1.8 (1.7-2.0)       | 12.9                       | 9.0 (7.7-10.5)          | 3.3 (2.7-4.1)       |
| Any (1-7 days) exposure to smoking in the home# | 29.8                       | 3.3 (3.1-3.5)           | 1.7 (1.5-1.8)       | 28.8                       | 6.3 (5.5-7.2)           | 2.6 (2.1-3.1)       |
| Neither parent smokes                           | 59.6                       | 1.0                     | 1.0                 | 67.1                       | 1.0                     | 1.0                 |
| Only mother smokes                              | 11.7                       | 2.7 (2.4-2.9)           | 1.3 (1.2-1.5)       | 9.8                        | 3.9 (3.2-4.7)           | 1.2 (1.0-1.5)*      |
| Only father smokes                              | 14.4                       | 1.9 (1.7-2.0)           | 1.3 (1.2-1.4)       | 11.9                       | 2.5 (2.1-3.1)           | 1.2 (0.9-1.5)*      |
| Both parents smoke                              | 14.3                       | 4.2 (3.9-4.6)           | 1.3 (1.2-1.5)       | 11.2                       | 6.2 (5.3-7.3)           | 1.2 (1.0-1.5)*      |
| Older sibling smokes                            | 24.9                       | 3.6 (3.4-3.8)           | 2.1 (1.9-2.2)       | 16.6                       | 4.7 (4.1-5.3)           | 1.7 (1.5-2.0)       |
| Best friend smokes                              | 28.5                       | 11.4 (10.7-12.1)        | 8.4 (7.9 -9.0)      | 9.3                        | 19.6 (17.0-22.5)        | 11.8 (10.1-13.6)    |
|                                                 | MĀORI                      |                         |                     |                            |                         |                     |
|                                                 | N=5,425                    |                         |                     | N=4,215                    |                         |                     |
| No exposure to smoking in the home (0 days)     | 52                         | 1.0                     | 1.0                 | 50.6                       | 1.0                     | 1.0                 |
| Daily exposure to smoking in the home           | 38.0                       | 2.8 (2.4-3.1)           | 1.9 (1.6-2.2)       | 25.3                       | 6.9 (5.3-9.0)           | 4.2 (3.0-5.9)       |
| Any (1-7 days) exposure to smoking in the home# | 47.6                       | 2.6 (2.3-2.9)           | 1.8 (1.6-2.1)       | 49.4                       | 5.2 (4.1-6.6)           | 3.4 (2.5-4.5)       |
| Neither parent smokes                           | 36.0                       | 1.0                     | 1.0                 | 43.6                       | 1.0                     | 1.0                 |
| Only mother smokes                              | 20.1                       | 2.0 (1.7-2.3)           | 1.3 (1.1-1.6)       | 17.5                       | 2.2 (1.6-2.9)           | 0.8 (0.5-1.1)*      |
| Only father smokes                              | 13.8                       | 1.9 (1.6-2.3)           | 1.5 (1.2-1.8)       | 14.0                       | 1.8 (1.3-2.5)           | 0.9 (0.6-1.3)*      |
| Both parents smoke                              | 30.2                       | 2.7 (2.3-3.1)           | 1.2 (1.0-1.4)*      | 24.8                       | 3.7 (2.9-4.7)           | 0.9 (0.7-1.3)*      |

|                      |      |               |               |      |                 |                |
|----------------------|------|---------------|---------------|------|-----------------|----------------|
| Older sibling smokes | 42.5 | 2.4 (2.1-2.7) | 1.6 (1.4-1.9) | 32.6 | 2.9 (2.4-3.5)   | 1.5 (1.2-1.9)  |
| Best friend smokes   | 46.0 | 6.8 (6.0-7.8) | 5.5 (4.8-6.3) | 18.5 | 11.2 (9.0-13.4) | 8.2 (6.5-10.2) |

Notes: model includes age, sex, ethnicity, decile (low, medium, high), smoking status of parents (none, mother, father, both), older sibling, best friend, and days exposed to smoking in the home (0, 1-2, 3-4, 5-6,7) except:

# model uses exposure to smoking in the home (any/none) instead of days exposed to smoking in the home (0, 1-2, 3-4, 5-6,7)

Models for Māori students only do not include ethnicity

All Odds Ratios are statistically significant ( $p < .001$ ) except those marked with \* which did not reach statistical significance at the 95% level.

Confidence intervals for prevalence are uniformly narrow, and have been omitted to aid the legibility of the table.

1  
2  
3 We found that some risk factors had an increasing strength of association with smoking over  
4 time. As shown in Table 2 and Figure 2, the adjusted odds ratio for daily exposure to  
5 smoking in the home (OR 1.8 (1.7-2.0) in 2003, OR 3.3 (2.7-4.1) in 2015) and best friend  
6 smoking (8.4 (7.9 -9.0) in 2003; 11.8 (10.1-13.6) in 2015) increased markedly over the study  
7 period. In contrast, there was little change in adjusted ORs for parental and sibling smoking  
8 between 2003 and 2015. A similar pattern was seen in both the sample overall, and in Māori  
9 (not shown).  
10  
11  
12  
13  
14  
15  
16  
17

## 18 **DISCUSSION**

19  
20  
21 We found that the longstanding decline in 14-15 year old smoking in NZ continued in 2015.  
22 Best friend smoking declined at a similar rate to 14-15 year old smoking during the 2002-  
23 2015 period and exposure to other risk factors decreased more modestly. There was no  
24 change in past week exposure to smoking in the home at the 1-7 days level, but daily  
25 exposure fell significantly. With the exception of parental smoking, all the risk factors  
26 examined were significant independent risk factors for adolescent smoking in all years. The  
27 strength of association (adjusted OR) between adolescent smoking and certain risk factors -  
28 exposure to smoking in the home and best friend smoking - increased markedly over the  
29 study period, while other relationships remained unchanged. Trends were similar in Māori  
30 and the population overall, although Māori adolescents were exposed to all risk factors at  
31 markedly higher rates than the general population, which accounts for higher adolescent  
32 smoking prevalence in this group.  
33  
34  
35  
36  
37  
38  
39  
40  
41  
42  
43  
44  
45  
46

47  
48 The aim of the study was to determine whether changing exposure to known risk factors  
49 explained the dramatic decline in adolescent smoking seen recently in NZ. Based on our  
50 results, we can conclude that declines in daily exposure to smoking inside the home, older  
51 sibling smoking and best friend smoking were all likely contributors, as each was  
52  
53  
54  
55  
56  
57

1  
2  
3 independently associated with regular smoking (with previous research suggestive of a causal  
4 relationship) and prevalence of exposure declined over the study period. Our findings do not  
5 support the idea that reduced smoking prevalence among parents was a significant driver of  
6 adolescent smoking decline. In most years parental smoking was not a statistically significant  
7 independent predictor of adolescent smoking, so we can conclude that (modest) declines in  
8 exposure to parental smoking have made little if any contribution. Our findings, consistent  
9 with previous research,<sup>33-36</sup> suggest it is exposure to smoking in the home, rather than  
10 parental smoking per se, which influences smoking uptake in this age group. Our findings  
11 add to a growing body of research suggesting that exposure to second hand smoke may  
12 predispose young people to tobacco use and nicotine dependency via biological,  
13 psychological and/or social mechanisms.<sup>44</sup> Greater research and policy attention to  
14 smokefree homes (and cars) as part of a comprehensive smoking prevention approach is  
15 therefore warranted.

16  
17  
18  
19  
20  
21  
22  
23  
24  
25  
26  
27  
28  
29  
30  
31  
32 The smoking status of respondents' best friend was by far the strongest predictor of regular  
33 smoking in 14-15 year olds, with the association strengthening over the study period. It is  
34 important to note that this association may be partly due to smokers seeking out other  
35 smokers as friends, as well as via a probable causal influence.<sup>4</sup> However, at the population  
36 level, it would be a circular to suggest that declining best friend smoking was driving the  
37 decline in prevalence of adolescent smoking, since survey respondents and their best friends  
38 belong to the same cohort. The question remains: if decreases in best friend smoking are  
39 resulting in reduced risk of adolescent smoking at the individual level, what is driving the  
40 decline in best friend smoking? One possibility is that, since younger adolescents are strongly  
41 influenced by adolescents slightly older than themselves (including siblings), a virtuous cycle  
42 may have developed whereby a decline in smoking in one year group has led to lower  
43 smoking uptake in the subsequent year group, and so on. Further research, perhaps drawing  
44  
45  
46  
47  
48  
49  
50  
51  
52  
53  
54  
55  
56  
57  
58  
59  
60



1  
2  
3 on communicable disease methodology, could test this hypothesis and explore how the  
4  
5 'social transmission' of smoking (and other health risk behaviours) influences population  
6  
7 prevalence over time. Should this hypothesis prove to be correct, the trigger for the sudden  
8  
9 change from rapidly rising to rapidly falling adolescent tobacco use from the late 1990s to the  
10  
11 early 2000s still remains to be identified.  
12

13  
14 It is possible that changes in the social meaning of smoking<sup>45 46</sup> and the policy context<sup>10 47</sup>  
15  
16 may have played a role. For example, policy responses to rising adolescent smoking in the  
17  
18 1990s may have influence teen smoking in NZ, as they appear to have done in Australia<sup>9 10</sup>  
19  
20 and the US.<sup>8</sup> Smoking in NZ 14-15 year olds peaked in 1999, two years after the legal age of  
21  
22 tobacco purchase was raised from 16 to 18 years of age, and a year after a 1998 tax increase  
23  
24 which raised the price of a packet of 20 cigarettes by 13%.<sup>48</sup> The turning point in adolescent  
25  
26 smoking also closely followed the 'Why start?' mass media campaign targeting youth which  
27  
28 ran from 1996-1998. It is plausible that, collectively, these measures contributed to the  
29  
30 denormalisation of smoking, which, rather than any specific intervention, may have been the  
31  
32 trigger for adolescent smoking decline both in NZ and other jurisdictions. As Simon  
33  
34 Chapman has pointed out, denormalisation involves an 'interplay of continuous,  
35  
36 uncontrolled, unmeasured, and sometimes unmeasurable variables intended to influence  
37  
38 [tobacco] consumption', and cannot be reduced to the sum of its parts.<sup>49</sup> However if tobacco  
39  
40 denormalisation, along with the other factors discussed above, explains the decline in  
41  
42 adolescent smoking, is it simply a coincidence that teen alcohol use, teen pregnancy and  
43  
44 juvenile crime have also declined over the same period, or does this suggest other over-  
45  
46 arching influences that are impacting on a range of youth risk-taking behaviours?  
47  
48  
49  
50

51  
52 As far as we are aware, this is the first study to explore trends in exposure to known risk  
53  
54 factors with the purpose of better understanding the drivers of adolescent smoking decline.  
55

56  
57 Strengths of the study include the large sample size, and demographic similarity between the  
58  
59

1  
2  
3 sample and the Year 10 population, suggesting response bias was not a substantial issue.  
4  
5 Systematic under- and over-representation were found to be relatively consistent over time  
6  
7 and therefore unlikely to affect trend analysis, which was the focus of our study. The methods  
8  
9 for the ASH survey were broadly consistent between years, with minor changes (e.g. a  
10  
11 change in fieldwork timing from 2011) unlikely to contribute significantly to the trends  
12  
13 observed. Since there is strong similarity between NZ and other high income Western  
14  
15 countries at a late stage in the tobacco epidemic in terms of trends in adolescent smoking and  
16  
17 known risk factors, it is likely that our conclusions may be generalisable to similar countries,  
18  
19 but this remains to be confirmed through further research.  
20  
21

22  
23 Given the complex array of factors at various levels that are known to influence smoking  
24  
25 uptake, one of the limitations of our study was the limited number of risk factors for which  
26  
27 consistent data was available. Having said that, we found that less than 1% of students  
28  
29 unexposed to any of the included risk factors were regular smokers in 2015. So while we  
30  
31 have included only a small number of risk factors, collectively they have strong predictive  
32  
33 power. The study was based on self-report data, with its inherent limitations; however recent  
34  
35 biomarker testing of a sub-sample of ASH Year 10 participants indicated that the survey  
36  
37 provides an accurate population estimate of smoking prevalence.<sup>50</sup> We used school decile as  
38  
39 a proxy for socioeconomic status (SES), since more direct measures were unavailable.  
40  
41 Because school communities are heterogeneous, it is an imperfect measure at the individual  
42  
43 level, and residual confounding by socioeconomic status is possible in our adjusted  
44  
45 associations. Finally, it is not possible to draw causal inferences based on cross-sectional  
46  
47 data, and, much remains unknown about the mechanisms by which the risk factors examined  
48  
49 might influence adolescent behaviour.  
50  
51  
52  
53  
54  
55  
56  
57  
58  
59  
60

## Conclusions

In summary, our findings suggest that declining exposure to daily smoking in the home and older sibling smoking have contributed to the decline in adolescent smoking in New Zealand since 2002, but reduced exposure to these risk factors only partially explains the pattern observed. Changes in parental smoking prevalence appear to have had little or no effect. We hypothesise that adolescent smoking decline may have been (to some degree) self-perpetuating via a virtuous cycle of peer influence, however further research is needed to confirm this. It is likely that factors other than those in our model are at play, with changes in the social meaning of smoking, the policy context and broader socio-cultural changes all potential contributors. Further research is needed to identify other contributing factors and determine their relative importance.

## Acknowledgements

The authors wish to acknowledge the data owners, ASH New Zealand, for access to the ASH Year 10 Snapshot Survey data. The ASH Year 10 Snapshot Survey is part of the New Zealand Youth Tobacco Monitor, a national, school-based survey of young people's smoking behaviours, attitudes and associated risk factors.

We also thank the advisory group who provided project oversight, feedback, and/or technical advice. In particular we thank Rob McGee (University of Otago), Sicily Sunseri (Health Promotion Agency), and Andrew Waa (University of Otago) for feedback on earlier drafts.

## Contributorship statement

All authors contributed to the conception and design of the study. The analysis was executed by DS and JB, with oversight by RE. JB drafted the manuscript with input from all authors.

## Funding

This work was supported by a University of Otago Research Grant 507415.

## Competing interests

None declared.

## Data sharing statement

The data is owned by ASH New Zealand, and cannot be shared by the authors.

## References

1. Ministry of Health. Health Loss in New Zealand 1990-2013: A Report from the New Zealand Burden of Diseases, Injuries and Risk Factors Study. Wellington: Ministry of Health 2016.
2. Blakely T, Fawcett J, Hunt D, et al. What is the contribution of smoking and socioeconomic position to ethnic inequalities in mortality in New Zealand? *Lancet* 2006;368(9529):44-52.
3. David A, Esson K, Perucic A-M, et al. Tobacco use: equity and social determinants. In: E B, Sivasankara Kurup A, eds. Equity, social determinants and public health programmes. Geneva: World Health Organization 2010.
4. Centers for Disease Control. Preventing tobacco use among youth and young adults: A report of the Surgeon General. Atlanta, USA: Centers for Disease Control and Prevention 2012.
5. Action on Smoking and Health. ASH Year 10 Snapshot Survey: Topline Results. Auckland: Action on Smoking and Health (ASH), 2014.
6. Action on Smoking and Health. 2014 ASH Year 10 Snapshot Survey: Māori smoking. Auckland, New Zealand: ASH, 2014.
7. Ball J. Why are today's adolescents less likely to smoke, drink, take drugs or have sex than those in the 1990s? 15th World Congress on Public Health. Melbourne, Australia, 2017.
8. Pampel FC, Aguilar J. Changes in Youth Smoking, 1976-2002: A Time-Series Analysis. *Youth Soc* 2008;39(4):453-79. doi: 10.1177/0044118X07308070
9. White VM, Durkin SJ, Coomber K, et al. What is the role of tobacco control advertising intensity and duration in reducing adolescent smoking prevalence? Findings from 16 years of tobacco control mass media advertising in Australia. *Tob Control* 2015;24(2):198-204. doi: 10.1136/tobaccocontrol-2012-050945
10. White VM, Warne CD, Spittal MJ, et al. What impact have tobacco control policies, cigarette price and tobacco control programme funding had on Australian adolescents' smoking? Findings over a 15-year period. *Addiction* 2011;106(8):1493-502. doi: 10.1111/j.1360-0443.2011.03429.x
11. Charlton A, Bates C. Decline in teenage smoking with rise in mobile phone ownership: hypothesis. *BMJ* 2000;321:1155.
12. Twenge JM. IGen: Why Today's Super-Connected Kids Are Growing Up Less Rebellious, More Tolerant, Less Happy--and Completely Unprepared for Adulthood. New York: Simon and Schuster 2017.
13. Durkee T, Carli V, Floderus B, et al. Pathological Internet Use and Risk-Behaviors among European Adolescents. *Int J Environ Res Public Health* 2016;13(3):294.

14. Gommans R, Stevens GW, Finne E, et al. Frequent electronic media communication with friends is associated with higher adolescent substance use. *Int J Public Health* 2015;60(2):167-77. doi: 10.1007/s00038-014-0624-0
15. Huang GC, Okamoto J, Valente TW, et al. Effects of Media and Social Standing on Smoking Behaviors among Adolescents in China. *Journal of Children and Media* 2012;6(1):100-18. doi: 10.1080/17482798.2011.633411
16. Iannotti RJ, Kogan MD, Janssen I, et al. Patterns of adolescent physical activity, screen-based media use, and positive and negative health indicators in the U.S. and Canada. *J Adolesc Health* 2009;44(5):493-9. doi: 10.1016/j.jadohealth.2008.10.142
17. Koivusilta L, Lintonen T, Rimpela A. Mobile phone use has not replaced smoking in adolescence. *BMJ* 2003;326(7381):161.
18. Koivusilta L, Lintonen T, Rimpelä A. Intensity of mobile phone use and health compromising behaviours—how is information and communication technology connected to health-related lifestyle in adolescence? *Journal of adolescence* 2005;28(1):35-47.
19. Meldrum RC, Clark J. Adolescent virtual time spent socializing with peers, substance use, and delinquency. *Crime & Delinquency* 2015;61(8):1104-26.
20. Morioka H, Itani O, Osaki Y, et al. Association Between Smoking and Problematic Internet Use Among Japanese Adolescents: Large-Scale Nationwide Epidemiological Study. *Cyberpsychol Behav Soc Netw* 2016;19(9):557-61. doi: 10.1089/cyber.2016.0182
21. Osaki Y, Ohida T, Kanda H, et al. Mobile Phone Use does not Discourage Adolescent Smoking in Japan. *Asian Pacific Journal of Cancer Prevention* 2012;13(3):1011-14. doi: 10.7314/apjcp.2012.13.3.1011
22. Steggle N, Jarvis MJ. Do mobile phones replace cigarette smoking among teenagers? *Tob Control* 2003;12(3):339-40.
23. Gauthier AH, Smeeding TM, Furstenberg FF. Are parents investing less time in children? Trends in selected industrialized countries. *Population and development review* 2004;30(4):647-72.
24. Guryan J, Hurst E, Kearney M. Parental Education and Parental Time with Children. *The Journal of Economic Perspectives*, 2008;22(3):23-46.
25. Morman MT, Floyd K. A “changing culture of fatherhood”: Effects on affectionate communication, closeness, and satisfaction in men’s relationships with their fathers and their sons. *Western Journal of Communication* 2002;66(4):395-411. doi: 10.1080/10570310209374746
26. Thapa A, Cohen J, Guffey S, et al. A Review of School Climate Research. *Review of Educational Research* 2013;83(3):357-85. doi: 10.3102/0034654313483907
27. Cornell D, Huang F. Authoritative School Climate and High School Student Risk Behavior: A Cross-sectional Multi-level Analysis of Student Self-Reports. *J Youth Adolesc* 2016;45(11):2246-59. doi: 10.1007/s10964-016-0424-3
28. Jamal F, Fletcher A, Harden A, et al. The school environment and student health: a systematic review and meta-ethnography of qualitative research. *BMC public health* 2013;13(1):798.
29. Settersten Jr RA, Ray B. What’s going on with young people today? The long and twisting path to adulthood. *The future of children* 2010;20(1):19-41.
30. Rea D, Callister P. The changing nature of young people’s transitions in New Zealand. Wellington: Institute of Policy Studies, Victoria University, 2009.
31. Tyas SL, Pederson LL. Psychosocial factors related to adolescent smoking: a critical review of the literature. *Tob Control* 1998;7(4):409-20.
32. Darling H, Reeder A. Is exposure to secondhand tobacco smoke in the home related to daily smoking among youth? *Aust N Z J Public Health* 2003;27(6):655-56.
33. Waa A, Edwards R, Newcombe R, et al. Parental behaviours, but not parental smoking, influence current smoking and smoking susceptibility among 14 and 15 year-old children. *Aust N Z J Public Health* 2011;35(6):530-36.

- 1  
2  
3 34. Becklake MR, Ghezzi H, Ernst P. Childhood predictors of smoking in adolescence: a follow-up  
4 study of Montreal schoolchildren. *CMAJ* 2005;173(4):377-9. doi: 10.1503/cmaj.1041428
- 5 35. Wang MP, Ho SY, Lam TH. Parental smoking, exposure to secondhand smoke at home, and  
6 smoking initiation among young children. *Nicotine Tob Res* 2011;13(9):827-32. doi:  
7 10.1093/ntr/ntr083
- 8 36. Voorhees CC, Ye C, Carter-Pokras O, et al. Peers, tobacco advertising, and secondhand smoke  
9 exposure influences smoking initiation in diverse adolescents. *Am J Health Prom*  
10 2011;25(3):e1-e11.
- 11 37. Selya AS, Dierker LC, Rose JS, et al. Risk factors for adolescent smoking: parental smoking and the  
12 mediating role of nicotine dependence. *Drug and alcohol dependence* 2012;124(3):311-8.  
13 doi: 10.1016/j.drugalcdep.2012.02.004
- 14 38. Belanger M, O'Loughlin J, Okoli CT, et al. Nicotine dependence symptoms among young never-  
15 smokers exposed to secondhand tobacco smoke. *Addict Behav* 2008;33(12):1557-63. doi:  
16 10.1016/j.addbeh.2008.07.011
- 17 39. Schuck K, Kleinjan M, Otten R, et al. Responses to environmental smoking in never-smoking  
18 children: can symptoms of nicotine addiction develop in response to environmental tobacco  
19 smoke exposure? *J Psychopharmacol* 2013;27(6):533-40. doi: 10.1177/0269881112466184
- 20 40. Okoli CTC, Kelly T, Hahn EJ. Secondhand smoke and nicotine exposure: A brief review. *Addict*  
21 *Behav* 2007;32(10):1977-88. doi: <http://dx.doi.org/10.1016/j.addbeh.2006.12.024>
- 22 41. Brody AL, Mandelkern MA, London ED, et al. Effect of secondhand smoke on occupancy of  
23 nicotinic acetylcholine receptors in brain. *Arch Gen Psychiatry* 2011;68(9):953-60. doi:  
24 10.1001/archgenpsychiatry.2011.51
- 25 42. Action on Smoking and Health. 2014 ASH Year 10 Snapshot Survey: Information and  
26 methodology. Auckland: Action on Smoking and Health, 2014.
- 27 43. Ministry of Education. School deciles: Ministry of Education; 2017 [Available from:  
28 [https://education.govt.nz/school/running-a-school/resourcing/operational-funding/school-](https://education.govt.nz/school/running-a-school/resourcing/operational-funding/school-decile-ratings/)  
29 [decile-ratings/](https://education.govt.nz/school/running-a-school/resourcing/operational-funding/school-decile-ratings/) accessed 29 June 2017.
- 30 44. Okoli CT, Kodet J. A systematic review of secondhand tobacco smoke exposure and smoking  
31 behaviors: Smoking status, susceptibility, initiation, dependence, and cessation. *Addict*  
32 *Behav* 2015;47:22-32. doi: 10.1016/j.addbeh.2015.03.018
- 33 45. Plumridge EW, Fitzgerald LJ, Abel GM. Performing coolness: smoking refusal and adolescent  
34 identities. *Health Education Research* 2002;17(2):167-79.
- 35 46. Nichter M. Smoking: what does culture have to do with it? *Addiction* 2003;98(s1):139-45.
- 36 47. Dessaix A, Maag A, McKenzie J, et al. Factors influencing reductions in smoking among Australian  
37 adolescents. *Public Health Res Pract* 2016;26(1) doi: 10.17061/phrp2611605
- 38 48. O'Dea D, Thomson G. Report on Tobacco Taxation in New Zealand Volume I. Wellington, New  
39 Zealand, 2007.
- 40 49. Chapman S. Unravelling gossamer with boxing gloves: problems in explaining the decline in  
41 smoking. *British Medical Journal* 2003;307:429-32.
- 42 50. Sunseri S, White J. Class, please spit: using a biochemical validation of self-reported smoking in a  
43 national sample of young people. 13th Behavioural Research in Cancer Control Conference.  
44 Melbourne, Australia: Cancer Council Victoria., 2017.
- 45  
46  
47  
48  
49  
50  
51  
52  
53  
54  
55  
56  
57  
58  
59  
60

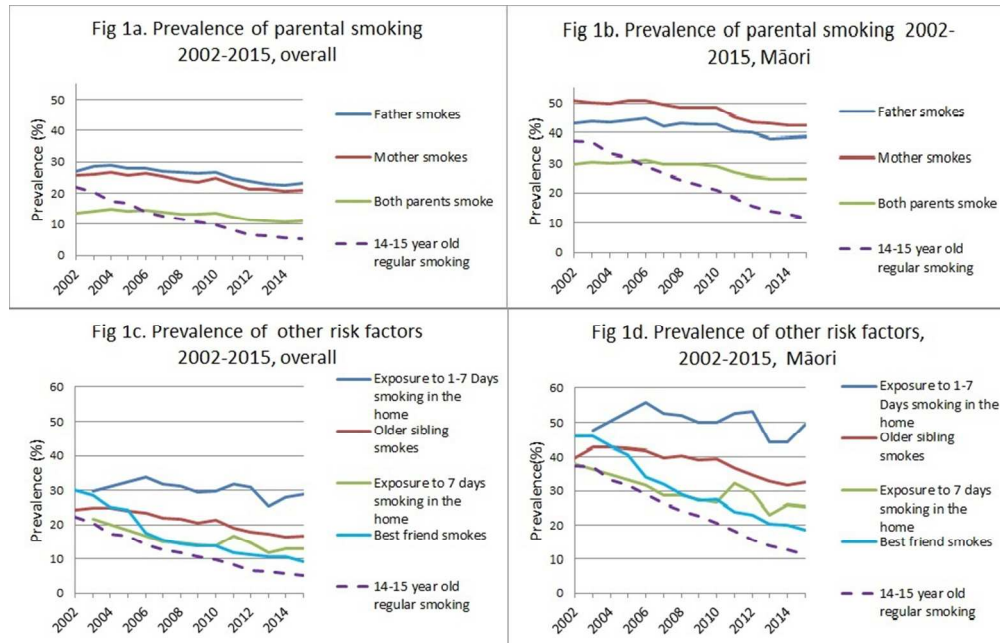

Prevalence of regular smoking and risk factors, 2002-2015, overall and Māori.

265x170mm (96 x 96 DPI)



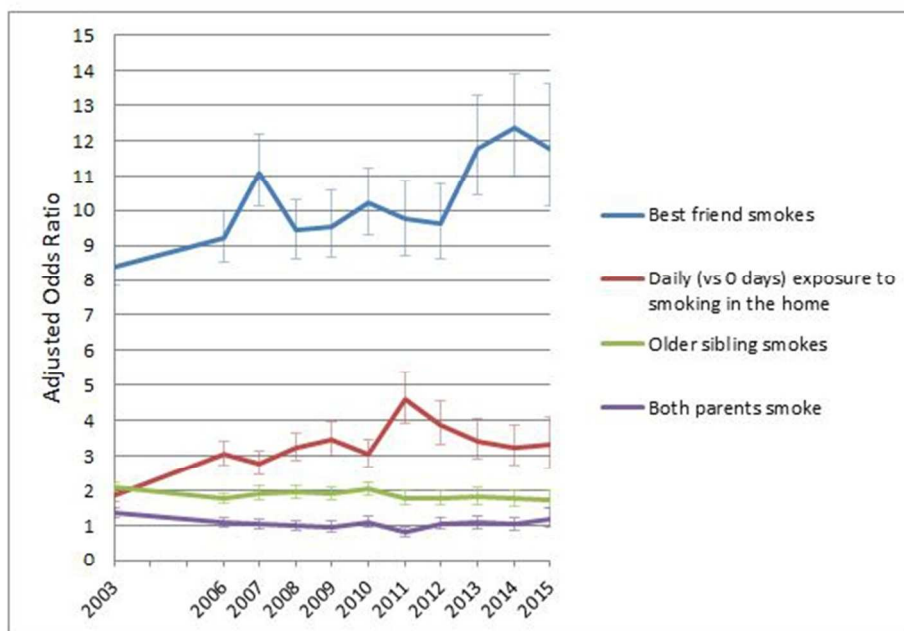

Adjusted odds ratios for key risk factors, 2003-2015.

165x110mm (96 x 96 DPI)



1  
2  
3  
4  
5  
6  
7  
8  
9  
10  
11  
12  
13  
14  
15  
16  
17  
18  
19  
20  
21  
22  
23  
24  
25  
26  
27  
28  
29  
30  
31  
32  
33  
34  
35  
36  
37  
38  
39  
40  
41  
42  
43  
44  
45  
46  
47

Supplementary table: Sample characteristics and comparison with Year 10 population (% absolute difference)

|             |              | Total | Age      |          | Sex   |        | School Decile |        |       | Ethnicity |       |         |       |
|-------------|--------------|-------|----------|----------|-------|--------|---------------|--------|-------|-----------|-------|---------|-------|
|             |              |       | 14 years | 15 years | Male  | Female | Low           | Medium | High  | NZEO      | Maori | Pacific | Asian |
| <b>2002</b> | <b>N</b>     | 28088 | 13161    | 14927    | 13911 | 14177  | 4505          | 13007  | 10576 | 19395     | 4670  | 1833    | 2190  |
|             | %            |       | 47%      | 53%      | 50%   | 50%    | 16%           | 46%    | 38%   | 69%       | 17%   | 7%      | 8%    |
|             | dif from pop |       |          |          | -1%   | 1%     | -4%           | 2%     | 4%    |           |       |         |       |
| <b>2003</b> | <b>N</b>     | 31377 | 14585    | 16792    | 15492 | 15885  | 5272          | 14274  | 11831 | 20716     | 5425  | 2174    | 3062  |
|             | %            |       | 46%      | 54%      | 49%   | 51%    | 17%           | 45%    | 38%   | 66%       | 17%   | 7%      | 10%   |
|             | dif from pop |       |          |          | -2%   | 2%     | -3%           | 3%     | 5%    |           |       |         |       |
| <b>2004</b> | <b>N</b>     | 30807 | 18668    | 12139    | 14996 | 15811  | 5889          | 13373  | 11545 | 19888     | 5694  | 2244    | 2981  |
|             | %            |       | 61%      | 39%      | 49%   | 51%    | 19%           | 43%    | 37%   | 65%       | 18%   | 7%      | 10%   |
|             | dif from pop |       |          |          | -2%   | 2%     | -1%           | 1%     | 4%    |           |       |         |       |
| <b>2005</b> | <b>N</b>     | 31833 | 15901    | 15932    | 15211 | 16622  | 4719          | 15374  | 11740 | 21176     | 5435  | 2172    | 3050  |
|             | %            |       | 50%      | 50%      | 48%   | 52%    | 15%           | 48%    | 37%   | 67%       | 17%   | 7%      | 10%   |
|             | dif from pop |       |          |          | -3%   | 3%     | -3%           | 2%     | 5%    |           |       |         |       |
| <b>2006</b> | <b>N</b>     | 31690 | 19996    | 11694    | 15642 | 16048  | 4416          | 15935  | 11339 | 20161     | 6237  | 2252    | 3040  |
|             | %            |       | 63%      | 37%      | 49%   | 51%    | 14%           | 50%    | 36%   | 64%       | 20%   | 7%      | 10%   |
|             | dif from pop |       |          |          | -2%   | 2%     | -4%           | 4%     | 4%    | 2%        | -2%   | -1%     | 1%    |
| <b>2007</b> | <b>N</b>     | 25109 | 16213    | 8896     | 11988 | 13121  | 3558          | 11062  | 10489 | 16187     | 4653  | 1804    | 2465  |
|             | %            |       | 65%      | 35%      | 48%   | 52%    | 14%           | 44%    | 42%   | 64%       | 19%   | 7%      | 10%   |
|             | dif from pop |       |          |          | -4%   | 4%     | -4%           | -2%    | 10%   | 5%        | -3%   | -2%     | 0%    |
| <b>2008</b> | <b>N</b>     | 29682 | 18395    | 11287    | 14462 | 15220  | 4732          | 12875  | 12075 | 17913     | 5552  | 2863    | 3354  |

|             |              |       |       |       |       |       |      |       |       |       |      |      |      |
|-------------|--------------|-------|-------|-------|-------|-------|------|-------|-------|-------|------|------|------|
|             | %            |       | 62%   | 38%   | 49%   | 51%   | 16%  | 43%   | 41%   | 60%   | 19%  | 10%  | 11%  |
|             | dif from pop |       |       |       | -3%   | 3%    | -2%  | 0%    | 3%    | 1%    | -3%  | 1%   | 1%   |
| <b>2009</b> | N            | 24755 | 15977 | 8778  | 11607 | 13148 | 3235 | 11029 | 10491 | 15410 | 4304 | 2211 | 2830 |
|             | %            |       | 65%   | 35%   | 47%   | 53%   | 13%  | 45%   | 42%   | 62%   | 17%  | 9%   | 11%  |
|             | dif from pop |       |       |       | -4%   | 4%    | -5%  | 1%    | 4%    | 4%    | -5%  | 0%   | 2%   |
| <b>2010</b> | N            | 31696 | 19725 | 11971 | 16636 | 15060 | 5111 | 14049 | 12536 | 18806 | 6315 | 3041 | 3534 |
|             | %            |       | 62%   | 38%   | 52%   | 48%   | 16%  | 44%   | 40%   | 59%   | 20%  | 10%  | 11%  |
|             | dif from pop |       |       |       | 1%    | -1%   | -2%  | 1%    | 2%    | 2%    | -3%  | 0%   | 1%   |
| <b>2011</b> | N            | 26028 | 21390 | 4638  | 12462 | 13566 | 3720 | 10843 | 11465 | 15669 | 4995 | 2453 | 2911 |
|             | %            |       | 82%   | 18%   | 48%   | 52%   | 14%  | 42%   | 44%   | 60%   | 19%  | 9%   | 11%  |
|             | dif from pop |       |       |       | -3%   | 3%    | -4%  | -1%   | 6%    | 3%    | -4%  | 0%   | 0%   |
| <b>2012</b> | N            | 30396 | 25098 | 5298  | 14918 | 15478 | 4982 | 12461 | 12953 | 17878 | 5800 | 3048 | 3670 |
|             | %            |       | 83%   | 17%   | 49%   | 51%   | 16%  | 41%   | 43%   | 59%   | 19%  | 10%  | 12%  |
|             | dif from pop |       |       |       | -2%   | 2%    | -1%  | -2%   | 4%    | 4%    | -3%  | 1%   | 1%   |
| <b>2013</b> | N            | 27014 | 22126 | 4888  | 13546 | 13468 | 4049 | 10875 | 12090 | 16146 | 5111 | 2628 | 3129 |
|             | %            |       | 82%   | 18%   | 50%   | 50%   | 15%  | 40%   | 45%   | 60%   | 19%  | 10%  | 12%  |
|             | dif from pop |       |       |       | -1%   | 1%    | -3%  | -2%   | 5%    | 3%    | -4%  | 0%   | 1%   |
| <b>2014</b> | N            | 29303 | 24206 | 5097  | 14164 | 15139 | 4359 | 12836 | 12108 | 16847 | 5779 | 2952 | 3725 |
|             | %            |       | 83%   | 17%   | 48%   | 52%   | 15%  | 44%   | 41%   | 57%   | 20%  | 10%  | 13%  |
|             | dif from pop |       |       |       | -3%   | 3%    | -3%  | 2%    | 2%    | 2%    | -4%  | 1%   | 1%   |
| <b>2015</b> | N            | 20443 | 16630 | 3813  | 10155 | 10288 | 3540 | 10024 | 6879  | 12123 | 4215 | 1884 | 2221 |
|             | %            |       | 81%   | 19%   | 50%   | 50%   | 17%  | 49%   | 34%   | 59%   | 21%  | 9%   | 11%  |
|             | dif from     |       |       |       | -2%   | 2%    | -2%  | 5%    | -2%   | 4%    | -3%  | 0%   | -1%  |

1  
2  
3  
4  
5  
6  
7  
8  
9  
10  
11  
12  
13  
14  
15  
16  
17  
18  
19  
20  
21  
22  
23  
24  
25  
26  
27  
28  
29  
30  
31  
32  
33  
34  
35  
36  
37  
38  
39  
40  
41  
42  
43  
44  
45  
46  
47

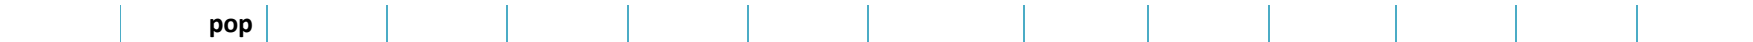

*Notes: Population data is based on Ministry of Education (MoE) records. Ethnicity data is not available from MoE prior to 2006, so ethnic comparison of population and sample is not possible 2002-2005.*

*Comparison between sample and population on age of students (14 or 15 years) is not shown since MoE data is measured at the midpoint in the year, whereas fieldwork dates differ from year to year, and as a result meaningful comparison is not possible.*

For peer review only

STROBE Statement—Checklist of items that should be included in reports of *cross-sectional studies*

|                           | Item No | Recommendation                                                                                                                                                                                    | Page no.   |
|---------------------------|---------|---------------------------------------------------------------------------------------------------------------------------------------------------------------------------------------------------|------------|
| <b>Title and abstract</b> | 1       | (a) Indicate the study's design with a commonly used term in the title or the abstract                                                                                                            | 1          |
|                           |         | (b) Provide in the abstract an informative and balanced summary of what was done and what was found                                                                                               | 2          |
| <b>Introduction</b>       |         |                                                                                                                                                                                                   |            |
| Background/rationale      | 2       | Explain the scientific background and rationale for the investigation being reported                                                                                                              | 3-4        |
| Objectives                | 3       | State specific objectives, including any prespecified hypotheses                                                                                                                                  | 6          |
| <b>Methods</b>            |         |                                                                                                                                                                                                   |            |
| Study design              | 4       | Present key elements of study design early in the paper                                                                                                                                           | 6-7        |
| Setting                   | 5       | Describe the setting, locations, and relevant dates, including periods of recruitment, exposure, follow-up, and data collection                                                                   | 6          |
| Participants              | 6       | (a) Give the eligibility criteria, and the sources and methods of selection of participants                                                                                                       | 6          |
| Variables                 | 7       | Clearly define all outcomes, exposures, predictors, potential confounders, and effect modifiers. Give diagnostic criteria, if applicable                                                          | 8          |
| Data sources/ measurement | 8*      | For each variable of interest, give sources of data and details of methods of assessment (measurement). Describe comparability of assessment methods if there is more than one group              | 8          |
| Bias                      | 9       | Describe any efforts to address potential sources of bias                                                                                                                                         | NA         |
| Study size                | 10      | Explain how the study size was arrived at                                                                                                                                                         | 6          |
| Quantitative variables    | 11      | Explain how quantitative variables were handled in the analyses. If applicable, describe which groupings were chosen and why                                                                      | 9          |
| Statistical methods       | 12      | (a) Describe all statistical methods, including those used to control for confounding                                                                                                             | 9          |
|                           |         | (b) Describe any methods used to examine subgroups and interactions                                                                                                                               | 9          |
|                           |         | (c) Explain how missing data were addressed                                                                                                                                                       | 9          |
|                           |         | (d) If applicable, describe analytical methods taking account of sampling strategy                                                                                                                | 9          |
|                           |         | (e) Describe any sensitivity analyses                                                                                                                                                             | NA         |
| <b>Results</b>            |         |                                                                                                                                                                                                   |            |
| Participants              | 13*     | (a) Report numbers of individuals at each stage of study—eg numbers potentially eligible, examined for eligibility, confirmed eligible, included in the study, completing follow-up, and analysed | 7          |
|                           |         | (b) Give reasons for non-participation at each stage                                                                                                                                              | NA         |
|                           |         | (c) Consider use of a flow diagram                                                                                                                                                                | NA         |
| Descriptive data          | 14*     | (a) Give characteristics of study participants (eg demographic, clinical, social) and information on exposures and potential confounders                                                          | 7<br>+Supl |
|                           |         | (b) Indicate number of participants with missing data for each variable of interest                                                                                                               | NA         |
| Outcome data              | 15*     | Report numbers of outcome events or summary measures                                                                                                                                              | 9          |
| Main results              | 16      | (a) Give unadjusted estimates and, if applicable, confounder-adjusted estimates and their precision (eg, 95% confidence interval). Make clear                                                     | 10-12      |

|                          |    |                                                                                                                                                                            |       |
|--------------------------|----|----------------------------------------------------------------------------------------------------------------------------------------------------------------------------|-------|
|                          |    | which confounders were adjusted for and why they were included                                                                                                             |       |
|                          |    | (b) Report category boundaries when continuous variables were categorized                                                                                                  | 9     |
|                          |    | (c) If relevant, consider translating estimates of relative risk into absolute risk for a meaningful time period                                                           | NA    |
| Other analyses           | 17 | Report other analyses done—eg analyses of subgroups and interactions, and sensitivity analyses                                                                             | 9-13  |
| <b>Discussion</b>        |    |                                                                                                                                                                            |       |
| Key results              | 18 | Summarise key results with reference to study objectives                                                                                                                   | 13-14 |
| Limitations              | 19 | Discuss limitations of the study, taking into account sources of potential bias or imprecision. Discuss both direction and magnitude of any potential bias                 | 16    |
| Interpretation           | 20 | Give a cautious overall interpretation of results considering objectives, limitations, multiplicity of analyses, results from similar studies, and other relevant evidence | 27    |
| Generalisability         | 21 | Discuss the generalisability (external validity) of the study results                                                                                                      | 16    |
| <b>Other information</b> |    |                                                                                                                                                                            |       |
| Funding                  | 22 | Give the source of funding and the role of the funders for the present study and, if applicable, for the original study on which the present article is based              | 18    |

\*Give information separately for exposed and unexposed groups.

**Note:** An Explanation and Elaboration article discusses each checklist item and gives methodological background and published examples of transparent reporting. The STROBE checklist is best used in conjunction with this article (freely available on the Web sites of PLoS Medicine at <http://www.plosmedicine.org/>, Annals of Internal Medicine at <http://www.annals.org/>, and Epidemiology at <http://www.epidem.com/>). Information on the STROBE Initiative is available at [www.strobe-statement.org](http://www.strobe-statement.org).

# BMJ Open

**Why has adolescent smoking declined dramatically? An investigation of changing exposure to risk factors using analysis of repeat cross-sectional data from New Zealand 2002-2015.**

|                                 |                                                                                                                                                                                                                                                    |
|---------------------------------|----------------------------------------------------------------------------------------------------------------------------------------------------------------------------------------------------------------------------------------------------|
| Journal:                        | <i>BMJ Open</i>                                                                                                                                                                                                                                    |
| Manuscript ID                   | bmjopen-2017-020320.R1                                                                                                                                                                                                                             |
| Article Type:                   | Research                                                                                                                                                                                                                                           |
| Date Submitted by the Author:   | 11-Mar-2018                                                                                                                                                                                                                                        |
| Complete List of Authors:       | Ball, Jude; University of Otago, Wellington, Department of Public Health; University of Otago, Wellington<br>Sim, Dalice; University of Otago, Wellington, Dean's Department<br>Edwards, Richard; University of Otago, Department of Public Health |
| <b>Primary Subject Heading</b>: | Smoking and tobacco                                                                                                                                                                                                                                |
| Secondary Subject Heading:      | Public health, Paediatrics, Epidemiology                                                                                                                                                                                                           |
| Keywords:                       | PAEDIATRICS, PREVENTIVE MEDICINE, PUBLIC HEALTH, EPIDEMIOLOGY                                                                                                                                                                                      |
|                                 |                                                                                                                                                                                                                                                    |

SCHOLARONE™  
Manuscripts

Peer Review Only

1  
2  
3  
4  
5  
6  
7  
8 **Why has adolescent smoking declined dramatically? An investigation of changing**  
9 **exposure to risk factors using analysis of repeat cross-sectional data from New Zealand**  
10 **2002-2015.**  
11

12  
13  
14 **Corresponding author:**

15 Jude Ball

16 Public Health Department,

17 University of Otago, Wellington

18 PO Box 7343, Newtown, Wellington 6242

19 New Zealand

20 Email: [jude.ball@otago.ac.nz](mailto:jude.ball@otago.ac.nz)

21 Phone: ++64 21 544 207  
22  
23  
24  
25  
26  
27  
28  
29  
30

31 **Co-authors:**

32 Dr Dalice Sim

33 Dean's Department, University of Otago, Wellington

34 Wellington, New Zealand  
35  
36  
37  
38  
39  
40

41 Prof Richard Edwards

42 Department of Public Health, University of Otago, Wellington

43 Wellington, New Zealand  
44  
45  
46  
47  
48  
49  
50

51 **Word Count: 4, 343**  
52  
53  
54  
55  
56  
57  
58  
59  
60

## ABSTRACT

**Objectives:** Adolescent smoking has declined in New Zealand and in many other countries since the late 1990s, yet the drivers of the decline are not well understood. We set out to determine i) whether changes in exposure to known predictors account for the decline, ii) whether relationships between known predictors and smoking outcomes have changed over time.

**Design:** Analysis of repeat cross-sectional data from a nationally representative survey.

**Setting:** New Zealand

**Participants:** Secondary school students aged 14-15. N=20,443 - 31,833 per year.

**Outcome measure:** Regular (at least monthly) smoking

**Methods:** We analysed smoking prevalence and exposure to risk factors (parental smoking, best friend smoking, older sibling smoking, and past week exposure to smoking in the home) based annual survey data 2002-2015. For each risk factor we calculated annual average change in exposure, and strength of association with adolescent smoking, expressed as odds ratios, (OR) for each year.

**Results:** There were declines in exposure to best friend smoking (absolute annual average decrease 1.5%), older sibling smoking (0.7%), daily exposure to smoking in the home (0.6%), maternal (0.5%) and paternal (0.5%) smoking. Adjusted ORs for exposure to smoking in the home and best friend smoking increased markedly over the study period while ORs for other risk factors remain unchanged.



1  
2  
3 **Conclusions:** Decreasing exposure to daily smoking in the home and older sibling smoking  
4 have likely contributed to declining adolescent smoking, but do not fully account for  
5 observed trends. Smoking status of best friend remains the strongest risk factor, with  
6 exposure falling dramatically, in line with population declines in adolescent smoking since  
7 2002. Further research is need to determine whether a ‘virtuous cycle’ (with declines in  
8 adolescent smoking begetting further declines) has contributed to observed trends, and to  
9 assess the contribution of factors outside our model.  
10  
11  
12  
13  
14  
15  
16  
17

## 18 **ARTICLE SUMMARY**

### 19 **Strengths and limitations of this study**

- 20  
21  
22  
23  
24 • The survey has a large sample size (N=20,443 - 31,833 per year), allowing accurate  
25 population estimates of smoking prevalence and exposure to risk factors (and  
26 estimates of the strength of relationships between risk factors and smoking outcomes)  
27 based on individual-level data.  
28  
29
- 30  
31  
32 • Due to data limitations, the study only includes a small number of risk factors,  
33 however the risk factors included have consistently been found to be among the  
34 strongest and most important predictors of adolescent smoking.  
35  
36
- 37  
38  
39 • Our study design (using repeat cross sectional data) does not enable causal inferences  
40 to be drawn, however our study builds on existing knowledge about the predictors of  
41 adolescent smoking initiation and, in the absence of certainty about causality,  
42 accounts for change over time in statistical terms.  
43  
44  
45  
46  
47  
48  
49  
50

## 51 **INTRODUCTION**

52  
53 Smoking is a leading cause of preventable illness and premature death<sup>1</sup> and a key driver of  
54 health disparities between ethnic and socioeconomic groups.<sup>2,3</sup> Long-term tobacco use  
55  
56  
57

1  
2  
3 typically begins with experimental smoking in adolescence,<sup>4</sup> and, internationally,  
4  
5 considerable research and policy attention has focused on understanding and preventing  
6  
7 smoking uptake in this age group.  
8  
9

10  
11  
12 The dramatic decline in adolescent smoking observed since the late 1990s in many high  
13  
14 income countries is good news from a public health perspective. In New Zealand (NZ), for  
15  
16 example, regular smoking (defined as at least monthly) among 14-15 year olds declined from a  
17  
18 peak of 29% in 1999 to 6% in 2014, with decreases across all main ethnic and socioeconomic  
19  
20 groups, and a convergence between boys and girls over the period.<sup>5</sup> Over the same period, the  
21  
22 proportion who had never smoked (i.e. not even a few puffs) rose from 32% to 78%.<sup>5</sup>  
23  
24 However, as in other countries,<sup>6</sup> ethnic and socioeconomic disparities remain pronounced, for  
25  
26 example Māori (indigenous) smoking prevalence in this age group was 13.2% in 2014  
27  
28 compared to 4.2% among non-Māori.<sup>7</sup> In the context of such marked disparities, understanding  
29  
30 the risk factor profile of priority groups is particularly important, to inform policies and  
31  
32 programmes aimed at further reducing smoking uptake.  
33  
34  
35  
36  
37

38  
39 Other countries including the USA, England and Australia have also experienced a decline in  
40  
41 teen smoking from the late 1990s, following a sharp rise in the early 1990s.<sup>8</sup> It is important to  
42  
43 understand the causes of this decline in order to help ensure it is sustained, and to enable  
44  
45 replication in other countries. Yet little research has focused on explaining this phenomenon.  
46  
47 Public health interventions such as increases in tobacco tax or smokefree environment  
48  
49 legislation may have played a role,<sup>9-11</sup> but they do not fully explain the observed trends, since  
50  
51 declines in adolescent smoking have occurred in countries with widely differing regulatory  
52  
53 contexts. This, and the fact that other adolescent risk behaviours (e.g. alcohol use, teen  
54  
55  
56  
57

1  
2  
3 pregnancy) have also declined over a similar time period,<sup>8</sup> suggests broader socio-cultural  
4 changes rather than specific tobacco control policies may contribute to this international trend.  
5  
6

7  
8 Such shifts could be generated by new technologies, for example. When the use of cell phones  
9 rose and smoking fell among adolescents in the late 1990s, a causal association was  
10 hypothesised.<sup>12</sup> More recently, attention has turned to other new technologies – smartphones  
11 and social media - and their potential role in driving generational change in attitudes and  
12 behaviour.<sup>13</sup> There is face validity to the idea that these new technologies may have changed  
13 the way young people socialise or project their identity, displacing the role of smoking or  
14 providing less opportunity for it. However, this hypothesis is challenged by a consistent body  
15 of evidence showing a *positive* association between smoking and cell phone/ internet/social  
16 media use at the individual level.<sup>14-23</sup>  
17  
18  
19  
20  
21  
22  
23  
24  
25  
26  
27

28 Other major changes since the mid-90s that could potentially impact on youth behaviour  
29 include changes in parenting,<sup>24-26</sup> changes in the school environment and ethos;<sup>27-29</sup> and broad  
30 economic and labour market conditions resulting in young people leaving school and achieving  
31 independence later than previous cohorts.<sup>30 31</sup> But before exploring these novel explanations for  
32 smoking decline, it is important to determine the extent to which the observed trends can be  
33 explained by changing exposure to known predictors of smoking initiation.  
34  
35  
36  
37  
38  
39  
40  
41

42 Proximal risk factors for adolescent smoking have been studied extensively. For example  
43 parental, sibling and peer smoking have consistently been identified as key risk factors,<sup>4 32</sup> with  
44 the Surgeon General's 2012 review concluding that the evidence is suggestive of a causal role  
45 for peer influences, and a potential causal role for parental smoking.<sup>4</sup> The review found that  
46 smoking by older siblings influences smoking in adolescents more consistently than does  
47 smoking by parents.<sup>4</sup> Exposure to smoking in the home, although a less studied factor, has also  
48 been shown to be strongly related to the likelihood of smoking in adolescents independent of  
49  
50  
51  
52  
53  
54  
55  
56  
57  
58  
59  
60

1  
2  
3 parental smoking status.<sup>33-37</sup> Studies suggest second hand smoke exposure may biologically  
4 predispose children to nicotine dependence<sup>38-42</sup> in addition to providing pro-smoking  
5 socialization.<sup>34</sup>  
6  
7  
8  
9

10 Despite extensive risk factor research, few studies have explored how exposure to risk factors  
11 has changed over time, whether the relationships between established risk factors and outcomes  
12 have changed over time, or how such changes may be contributing to changes in adolescent  
13 smoking at the population level. Assuming that an observed individual-level relationship  
14 between a risk factor and adolescent smoking is causal, then declining exposure to that risk  
15 factor over time at the population level (while the strength of association is maintained or  
16 increased at the individual level) must contribute to a population decline in adolescent smoking.  
17  
18 Even in the absence of certainty about causality, exploration of changes in level of exposure  
19 and strength of association over time allows us to 'explain' or account for changes in outcomes  
20 over time in statistical terms.  
21  
22  
23  
24  
25  
26  
27  
28  
29  
30  
31

32 The current study explores trends in exposure of 14-15 year olds to known predictors of  
33 adolescent smoking (parental, sibling and peer smoking and exposure to smoking in the home)  
34 and the strength of the relationships between these risk factors and adolescent smoking from  
35 2002 to 2015 in NZ. We sought to better understand the potential drivers of adolescent smoking  
36 decline to inform the continuation and replication of this positive trend. Our study also updates  
37 regular smoking trends (overall, and by ethnicity, gender and socioeconomic position) using  
38 2015 data.  
39  
40  
41  
42  
43  
44  
45  
46  
47

## 48 **METHODS**

49  
50 We analysed repeat cross-sectional data from the ASH Year 10 Snapshot Survey series, an  
51 annual school-based survey of 14-15 year olds in NZ, which is administered by Action on  
52 Smoking and Health NZ (ASH) and is part of the New Zealand Youth Tobacco Monitor. The  
53  
54  
55  
56  
57

questionnaire includes a set of 'core' questions that have remained consistent over time to enable trend monitoring, and additional questions which change from year to year. Years included in the current study were 2002-2015, since key variables of interest were unavailable prior to 2002. Furthermore, exposure to smoking in the home was not included in the questionnaire in 2002 or 2004-5, and therefore multivariable analysis includes only data from 2003 and 2006-15.

All public and private schools with Year 10 students were invited to participate in the ASH Year 10 Snapshot each year. School response rates range from 44-67%<sup>43</sup> (with a lower school response rate in 2015 due to limited resources for liaising with schools that year). Table 1 shows the sample size and student response rate (as a proportion of the total Year 10 population) by year.

Following previously published ASH analyses, analysis was restricted to respondents aged 14 or 15 at the time of the survey. For consistency between bivariate (unadjusted) and multivariable (adjusted) analyses, only respondents with complete data for all variables (smoking status, parental smoking, sibling smoking, best friend smoking, age, gender, ethnicity, school decile, and school ID, and for 2003 and 2006-15 exposure to smoking in the home) were included in the analyses. In addition, only schools with at least 20 respondents were included. Table 1 shows the number of valid survey responses received (i.e. those with complete data for age (14/15 years), sex, ethnicity and smoking status), and the number included in our study (after exclusions above), by year, and shows that after application of our exclusion criteria 96% of valid responses were included.

*Table 1. Sample size and student response rate by year*

| Year | NZ Year 10 | Valid | Responses | % Year 10 |
|------|------------|-------|-----------|-----------|
|------|------------|-------|-----------|-----------|

|              | population     | survey responses | included in study | population included in study |
|--------------|----------------|------------------|-------------------|------------------------------|
| <b>2002</b>  | 58,812         | 29,173           | 28,088            | 50%                          |
| <b>2003</b>  | 61,028         | 32,705           | 31,377            | 54%                          |
| <b>2004</b>  | 62,852         | 31,630           | 30,807            | 46%                          |
| <b>2005</b>  | 64,619         | 32,561           | 31,833            | 51%                          |
| <b>2006</b>  | 63,086         | 32,844           | 31,690            | 52%                          |
| <b>2007</b>  | 62,012         | 25,978           | 25,109            | 42%                          |
| <b>2008</b>  | 61,485         | 30,903           | 29,682            | 50%                          |
| <b>2009</b>  | 61,355         | 25,757           | 24,755            | 42%                          |
| <b>2010</b>  | 61,210         | 32,832           | 31,696            | 54%                          |
| <b>2011</b>  | 59,562         | 26,856           | 26,028            | 45%                          |
| <b>2012</b>  | 59,627         | 31,983           | 30,396            | 43%                          |
| <b>2013</b>  | 57,929         | 28,340           | 27,014            | 49%                          |
| <b>2014</b>  | 59,612         | 31,125           | 29,303            | 47%                          |
| <b>2015</b>  | 59,528         | 21,567           | 20,443            | 36%                          |
| <b>Total</b> | <b>852,717</b> | <b>414,254</b>   | <b>398,221</b>    | <b>47%</b>                   |

The sample (N=20,443 to 31,833 per year) comprised approximately half the Year 10 population each year. Detailed comparison of the included sample and population, by year, is provided in a Supplementary Table S1. This comparison shows that the sample closely resembles the population albeit with modest but consistent under-representation of Māori and students from low decile schools. (School decile is a school-level measure of the socio-economic position of a school's student community, explained further below.<sup>44</sup>)

Fieldwork was undertaken earlier in the year in 2011 and subsequently, meaning respondents were 2-3 months younger on average in 2011 and subsequent years, than in 2010 and prior years. Excluding the timing of fieldwork and changes to non-core questions, there has been consistency in survey instruments, administration and data management across included years.

In participating schools, the one-page survey is completed in class time under the supervision of teaching staff. Individual students may choose not to participate. To protect the confidentiality of students' responses, identifying information is not collected, and teachers

1  
2  
3 are requested not to check the completed surveys. Completed surveys are returned to ASH,  
4  
5 which oversees data entry, cleaning and coding.  
6  
7

8 The survey was approved, as a component of the NZ Youth Tobacco Monitor, by the  
9  
10 Ministry of Health Multiregional Health and Disability Ethics Committee in 2007. Further  
11  
12 details on survey methodology are available elsewhere.<sup>43</sup>  
13  
14

### 15 **Variables**

16  
17  
18 The outcome variable, 'regular smoking' (Y/N) was defined as smoking at least monthly,  
19  
20 based on the question 'How often do you smoke now?' The answer categories were: 'I have  
21  
22 never smoked/I am not a smoker now'; 'At least once a day'; 'At least once a week'; 'At least  
23  
24 once a month'; and 'Less often than once a month'.  
25

26  
27 Smoking status of mother, father, older sibling(s), and best friend were based on the question  
28  
29 'Which of the following people smoke?' with a dichotomous variable (current smoker,  
30  
31 yes/no) created for each. Previous research suggests that maternal smoking is more strongly  
32  
33 associated with adolescent smoking initiation than paternal smoking, therefore we examined  
34  
35 exposure to maternal and paternal smoking separately. For the purposes of multivariable  
36  
37 analysis, parental smoking was grouped into one variable, coded 0 = neither parent smokes, 1  
38  
39 = only mother smokes, 2 = only father smokes, 3 = both parents smoke.  
40  
41  
42

43  
44 Past week exposure to smoking in the home was based on the question 'During the past 7  
45  
46 days, on how many days have people smoked around you in your home?' Response  
47  
48 categories were 0 days, 1-2 days, 3-4 days, 5-6 days and 7 days. We recoded the responses  
49  
50 into three categories: 'Daily exposure' (7 days) 'less than daily exposure' (2-7 days) and 'no  
51  
52 exposure' (0 days).  
53  
54  
55  
56  
57  
58  
59  
60

1  
2  
3 Demographic variables were age (14 or 15 years old), sex (male or female), ethnicity  
4 (prioritised Māori, Pacific, Asian, NZ European/other (NZEO); and dichotomised into Māori  
5 and non-Māori) and school decile. School decile is calculated by the Ministry of Education  
6 for purposes of funding allocation, and is a school-level measure of the socioeconomic  
7 position of a school's student community. Details of how school decile is calculated are  
8 available from the Ministry of Education.<sup>44</sup> We grouped school decile into low (deciles 1-3:  
9 most deprived), medium (4-7), and high (8-10: least deprived). Each school also had an  
10 identification number (school ID) which was assigned to all respondents from that school.  
11  
12  
13  
14  
15  
16  
17  
18  
19

## 20 21 **Analysis**

22  
23 We used SPSS (IBM Corp. Released 2016. IBM SPSS Statistics for Windows, Version 24.0.  
24 Armonk, NY: IBM Corp.) to tabulate prevalence of regular smoking and prevalence of  
25 exposure to risk factors (overall and by sex, ethnicity and school decile) for each year. We  
26 then quantified the mean annual absolute change in proportion of respondents exposed to  
27 each risk factor using weighted linear regression (to adjust for differing variance by year by  
28 giving more weight to more accurate estimates of prevalence) with year as the independent  
29 variable. The weights were  $1/SD^2$  of the proportions.  
30  
31  
32  
33  
34  
35  
36  
37  
38  
39

40 Logistic regression (PROC Glimmix) using SAS/STAT software, (Version 9.4 of the SAS  
41 system for Windows. Copyright © 2002-2012, SAS Institute Inc., Cary, NC, USA.) was  
42 used to calculate bivariate odds ratios (OR) to determine the strength of the relationship  
43 between each risk factor and regular smoking for each year (Model 1, unadjusted). To adjust  
44 for potential clustering at the school level, school ID was entered as a random effect in the  
45 estimation of odds ratios. Multivariable logistic regression analysis (again with a random  
46 effect of school) was then conducted for each year using three models. Model 2 assessed the  
47 association between each risk factor and regular smoking adjusting for demographic variables  
48  
49  
50  
51  
52  
53  
54  
55  
56  
57  
58  
59  
60



1  
2  
3 (sex, age, ethnicity, and school decile) only. Model 3 adjusted for demographic factors (as in  
4 Model 2) plus parental, sibling and best friend smoking, to determine the independent  
5 relationship of each with adolescent smoking. Model four adjusted for all of the variables in  
6 Model 3, plus past week exposure to smoking in the home. This approach allows us to  
7 present adjusted estimates for parental and sibling smoking including and excluding smoking  
8 in the home, a factor which is likely to be on the causal pathway between parental and sibling  
9 smoking and adolescent smoking.  
10  
11  
12  
13  
14  
15  
16  
17

18 Because Māori adolescents have high smoking rates and are therefore a key priority group for  
19 preventive interventions, we wanted to test whether the relationships between risk factors and  
20 outcomes identified in the main analyses were also applicable to Māori. We conducted  
21 supplementary analyses for Māori, using logistic regression methods described above for  
22 Model 1 (unadjusted) and Model 4 (fully adjusted) models, except multivariate models did  
23 not include ethnicity.  
24  
25  
26  
27  
28  
29  
30  
31

### 32 **Patient and Public Involvement**

33  
34  
35 Patients were not involved in the design or conduct of this study, and nor were members of  
36 the general public.  
37  
38  
39

## 40 **RESULTS**

### 41 **Prevalence of regular smoking**

42  
43  
44  
45 We found that the long-term decline in prevalence of regular smoking among 14-15 year olds  
46 continued in 2015, to 5.4% (Figure 1). Based on weighted linear regression, the overall  
47 regular smoking rate reduced by an average of 1.2 % per year (in absolute terms) from 2002-  
48 2015.  
49  
50  
51  
52  
53  
54  
55  
56  
57  
58  
59  
60

1  
2  
3 Supplementary Figures S1, S2 and S3 show trends in prevalence of regular smoking stratified  
4 by ethnicity, school decile and gender, and indicate that smoking has declined in all  
5 demographic groups. Furthermore ethnic, socioeconomic position (SEP), and gender  
6 disparities have narrowed over time in absolute terms. However, as shown in Figure 2,  
7 smoking remains strongly patterned by both ethnicity and school decile, and is increasingly  
8 concentrated in Maori, Pacific and low decile groups (in relative terms) as adolescent  
9 smoking in other groups becomes increasingly rare.  
10  
11  
12  
13  
14  
15  
16  
17

### 18 **Changes in exposure to risk factors over time**

19  
20  
21 Trends in exposure to risk factors are shown in Figure 1. Parental smoking (Fig 1a) declined  
22 only modestly over the study period with maternal and paternal smoking both declining by an  
23 average rate of 0.5% per annum. Smoking among older siblings declined slightly more (Fig  
24 1b), at an average rate of 0.7% per annum, and ‘best friend smokes’ had the highest rate of  
25 decline at 1.5% per annum. Prevalence of daily exposure to smoking in the home fell from  
26 22% to 13% overall (an average decrease of 0.6% per annum), however less than daily  
27 exposure increased over the study period.  
28  
29  
30  
31  
32  
33  
34  
35  
36

37  
38 Supplementary Figures S4 to S10 show exposure to risk factors over time by ethnicity and  
39 school decile. They show that trends in exposure to risk factors followed a similar pattern in  
40 all ethnic and SEP subgroups, but disparities in levels of exposure were marked in all years.  
41  
42  
43  
44

### 45 **Changes in the relationship between risk factors and regular smoking over time**

46  
47  
48 As shown in Table 2, bivariate analysis (Model 1, unadjusted) confirmed that smoking status  
49 of best friend, older sibling(s), and parents were all strongly associated with smoking in 14-  
50 15 year olds in 2003 and 2015 at the individual level, as was exposure to smoking in the  
51 home. After adjusting for age, sex, and school decile (Model 2) the associations were slightly  
52  
53  
54  
55  
56  
57  
58  
59  
60

1  
2  
3 attenuated but remained strong. Model 3 added parental smoking, sibling smoking and best  
4 friend smoking to the model (but excluded exposure to smoking in the home), and after  
5  
6 adjustment for these and the demographic factors, associations were weakened but remained  
7  
8 statistically significant in both 2003 and 2012. The fully adjusted model (Model 4) included  
9  
10 exposure to smoking in the home as well as all the other risk and demographic factors. In  
11  
12 Model 4, strong and statistically significant associations with smoking status of best friend  
13  
14 and older sibling(s) and exposure to smoking in the home persisted, but parental smoking had  
15  
16 only a weak (2003) or non-significant (2015) association with the likelihood of regular  
17  
18 smoking.  
19  
20  
21  
22  
23  
24  
25  
26  
27  
28  
29  
30  
31  
32  
33  
34  
35  
36  
37  
38  
39  
40  
41  
42  
43  
44  
45  
46  
47  
48  
49  
50  
51  
52  
53  
54  
55  
56  
57  
58  
59  
60

Table 2: Associations between risk factors and regular smoking among adolescents, 2003 and 2015 expressed as odds ratios and 95% confidence intervals.

| 2003 (N=31,377)                                            |                            |                                |                                                       |                                                                                          |                                                                          |
|------------------------------------------------------------|----------------------------|--------------------------------|-------------------------------------------------------|------------------------------------------------------------------------------------------|--------------------------------------------------------------------------|
|                                                            | Prevalence of exposure (%) | Model 1: unadjusted odds ratio | Model 2: Odds ratio, adjusted for demographic factors | Model 3: Odds ratio adjusted for demographics, parental, sibling and best friend smoking | Model 4: Odds ratio fully adjusted for all demographics and risk factors |
| No exposure to smoking in the home (0 days)                | 70.2                       | 1.0                            | 1.0                                                   | -                                                                                        | 1.0                                                                      |
| Daily exposure to smoking in the home (7 days)             | 21.6                       | 3.8 (3.6, 4.0)                 | 3.4 (3.2, 3.6)                                        | -                                                                                        | 1.8 (1.7, 2.0)                                                           |
| Less than daily exposure to smoking in the home (1-6 days) | 8.1                        | 2.2 (2.0, 2.4)                 | 2.1 (1.9, 2.3)                                        | -                                                                                        | 1.4 (1.3, 1.6)                                                           |
| Neither parent smokes                                      | 59.6                       | 1.0                            | 1.0                                                   | 1.0                                                                                      | 1.0                                                                      |
| Only mother smokes                                         | 11.7                       | 2.7 (2.4, 2.9)                 | 2.3 (2.1, 2.5)                                        | 1.8 (1.6, 2.0)                                                                           | 1.3 (1.2, 1.5)                                                           |
| Only father smokes                                         | 14.4                       | 1.9 (1.7, 2.0)                 | 1.8 (1.7, 2.0)                                        | 1.5 (1.4, 1.7)                                                                           | 1.3 (1.2, 1.4)                                                           |
| Both parents smoke                                         | 14.3                       | 4.2 (3.9, 4.6)                 | 3.6 (3.3, 3.9)                                        | 2.0 (1.8, 2.1)                                                                           | 1.4 (1.2, 1.5)                                                           |
| Older sibling smokes                                       | 24.9                       | 3.6 (3.4, 3.8)                 | 3.1 (3.0, 3.3)                                        | 2.2 (2.0, 2.3)                                                                           | 2.1 (1.9, 2.2)                                                           |
| Best friend smokes                                         | 28.5                       | 11.4 (10.7, 12.1)              | 10.2 (9.5, 10.8)                                      | 8.6 (8.1, 9.2)                                                                           | 8.4 (7.9, 9.0)                                                           |
| 2015 (N=20,443)                                            |                            |                                |                                                       |                                                                                          |                                                                          |
|                                                            | Prevalence of exposure (%) | Model 1: unadjusted odds ratio | Model 2: Odds ratio, adjusted for demographic factors | Model 3: Odds ratio adjusted for demographics, parental, sibling and best friend smoking | Model 4: Odds ratio fully adjusted for all demographics and risk factors |
| No exposure to smoking                                     | 71.2                       | 1.0                            | 1.0                                                   | -                                                                                        | 1.0                                                                      |

1  
2  
3  
4  
5  
6  
7  
8  
9  
10  
11  
12  
13  
14  
15  
16  
17  
18  
19  
20  
21  
22  
23  
24  
25  
26  
27  
28  
29  
30  
31  
32  
33  
34  
35  
36  
37  
38  
39  
40  
41  
42  
43  
44  
45  
46  
47

|                                                 |      |                   |                   |                   |                   |
|-------------------------------------------------|------|-------------------|-------------------|-------------------|-------------------|
| in the home (0 days)                            |      |                   |                   |                   |                   |
| Daily exposure to smoking in the home           | 12.9 | 9.0 (7.7, 10.5)   | 7.3 (6.2, 8.5)    | -                 | 3.3 (2.7, 4.1)    |
| Less than daily exposure to smoking in the home | 28.8 | 6.3 (5.5, 7.2)    | 3.7 (3.1, 4.4)    | -                 | 2.6 (2.1, 3.1)    |
| Neither parent smokes                           | 67.1 | 1.0               | 1.0               | 1.0               | 1.0               |
| Only mother smokes                              | 9.8  | 3.9 (3.2, 4.7)    | 3.2 (2.6, 3.8)    | 2.1 (1.7, 2.6)    | 1.2 (1.0, 1.5)*   |
| Only father smokes                              | 11.9 | 2.5 (2.1-3.1)     | 2.3 (1.9, 2.8)    | 1.8 (1.4, 2.2)    | 1.2 (0.9, 1.5)*   |
| Both parents smoke                              | 11.2 | 6.2 (5.3, 7.3)    | 4.8 (4.0, 5.6)    | 2.3 (1.9, 2.8)    | 1.2 (1.0, 1.5)*   |
| Older sibling smokes                            | 16.6 | 4.7 (4.1, 5.3)    | 3.8 (3.3, 4.3)    | 2.0 (1.7, 2.3)    | 1.7 (1.5, 2.0)    |
| Best friend smokes                              | 9.3  | 19.6 (17.0, 22.5) | 17.1 (14.9, 19.7) | 13.0 (11.2, 15.0) | 11.8 (10.1, 13.6) |

*All Odds Ratios are statistically significant (p<.001) except those marked with \* which did not reach statistical significance at the 95% level.*

*Confidence intervals for prevalence are uniformly narrow, and have been omitted to aid the legibility of the table.*

1  
2  
3 We found that some risk factors had an increasing strength of association with smoking over  
4 time. As shown in Table 2, the fully-adjusted odds ratio (Model 4) for daily exposure to  
5 smoking in the home (OR 1.8 (1.7, 2.0) in 2003, OR 3.3 (2.7, 4.1) in 2015) and best friend  
6 smoking (8.4 (7.9, 9.0) in 2003; 11.8 (10.1, 13.6) in 2015) increased markedly over the study  
7 period. The statistical significance ( $p < 0.0001$ ) of these changes in OR was confirmed by  
8 modelling the interaction effect between risk factors and year (Supplementary Table S2). In  
9 contrast, there was no significant change in fully-adjusted ORs for parental and sibling  
10 smoking between 2003 and 2015. A similar pattern was seen in both the sample overall, and  
11 in Māori (Supplementary Table S3). Fully adjusted ORs for key risk factors for all available  
12 years are presented in Supplementary Figure S11, showing considerable year to year  
13 variation (and overall upward trend) in ORs for best friend smoking and exposure to smoking  
14 in the home, while ORs for parental and sibling smoking remained relatively constant over  
15 time.

## 31 **DISCUSSION**

32 We found that the longstanding decline in 14-15 year old smoking in NZ continued in 2015.  
33 Exposure to best friend smoking declined strongly during the 2002-2015 period and exposure  
34 to other risk factors decreased more modestly. There was no change in past week exposure to  
35 smoking in the home overall (i.e. 1-7 days), but daily exposure fell significantly, whilst less  
36 than daily exposure increased. With the exception of parental smoking, all the risk factors  
37 examined were significant independent risk factors for adolescent smoking in the fully  
38 adjusted models in all years. The strength of association (adjusted OR) between adolescent  
39 smoking and certain risk factors - exposure to smoking in the home and best friend smoking -  
40 increased markedly over the study period, while other relationships remained unchanged.  
41  
42  
43  
44  
45  
46  
47  
48  
49  
50  
51  
52  
53  
54  
55  
56  
57  
58  
59  
60

1  
2  
3 The aim of the study was to determine whether changing exposure to known risk factors  
4 explained (in statistical terms) the dramatic decline in adolescent smoking seen recently in  
5 NZ. Based on our results, we can conclude that declines in daily exposure to smoking in the  
6 home, older sibling smoking and best friend smoking were all likely contributors, as each was  
7 independently associated with regular smoking (with previous research suggestive of a causal  
8 relationship) and prevalence of exposure declined over the study period.  
9  
10  
11  
12  
13  
14  
15

16 The marked differences between unadjusted and adjusted ORs suggest that the risk factors in  
17 our study were strongly related to one another. This is consistent with research that shows  
18 that smoking clusters within occupations and neighbourhoods and is becoming increasingly  
19 concentrated in low-income communities.<sup>45 46</sup> As a result, adolescents tend experience life  
20 within smoking or non-smoking social circles, and therefore the smoking status of family  
21 members and friends are strongly correlated.  
22  
23  
24  
25  
26  
27  
28  
29

30 Our findings with regards to parental smoking are complex to interpret. Parental smoking was  
31 strongly associated with adolescent smoking in the unadjusted model and (somewhat less so)  
32 in adjusted models that excluded smoking in the home. However, in the fully adjusted model,  
33 the association became weak or non-significant. This, together with the strong association  
34 between parental smoking and SHS exposure in the home (data not shown), suggests that  
35 exposure to smoking in the home mediates or confounds (or both) the relationship between  
36 parental smoking and adolescent smoking. Our data and study design do not allow us to  
37 determine whether confounding or mediation is the dominant phenomenon. However, our  
38 findings suggest that declines in parental smoking have probably influenced the decline in  
39 adolescent smoking not directly (since parental smoking was not an independent risk factor in  
40 most years) but via declining exposure to other risk factors, particularly daily exposure to  
41 smoking in the home. This interpretation is consistent with previous research,<sup>34-37</sup> suggesting  
42 parental smoking may influence adolescent smoking primarily via exposure to smoking in the  
43  
44  
45  
46  
47  
48  
49  
50  
51  
52  
53  
54  
55  
56  
57  
58  
59  
60

1  
2  
3 home. Our findings add to a growing body of research suggesting that exposure to second  
4  
5 hand smoke may predispose young people to tobacco use and nicotine dependency via  
6  
7 biological, psychological and/or social mechanisms.<sup>47</sup> Greater research and policy attention to  
8  
9 smokefree homes (and cars) as part of a comprehensive smoking prevention approach is  
10  
11 therefore warranted.

12  
13  
14 The smoking status of respondents' best friend was by far the strongest risk factor for regular  
15  
16 smoking in 14-15 year olds, with the association strengthening over the study period. It is  
17  
18 important to note that this association may be partly due to smokers seeking out other  
19  
20 smokers as friends, as well as via a probable causal influence.<sup>4</sup> However, at the population  
21  
22 level, it would be a circular to suggest that declining best friend smoking was driving the  
23  
24 decline in prevalence of adolescent smoking, since survey respondents and their best friends  
25  
26 belong to the same cohort. The question remains: if decreases in best friend smoking are  
27  
28 resulting in reduced risk of adolescent smoking at the individual level, what is driving the  
29  
30 decline in best friend smoking? One possibility is that, since younger adolescents are strongly  
31  
32 influenced by peers and adolescents slightly older than themselves (including siblings), a  
33  
34 virtuous cycle may have developed whereby a decline in adolescent smoking at time 1 has  
35  
36 led to a subsequent decline in adolescent smoking at time 2 and so on. Further research,  
37  
38 perhaps drawing on communicable disease methodology, could test this hypothesis and  
39  
40 explore how the 'social transmission' of smoking (and other health risk behaviours)  
41  
42 influences population prevalence over time. Should this hypothesis prove to be correct, the  
43  
44 trigger for the sudden change from rapidly rising to rapidly falling adolescent tobacco use  
45  
46 from the late 1990s to the early 2000s still remains to be identified.

47  
48  
49 Whilst we found strong associations with established risk factors in our analyses, there are  
50  
51 likely to be other factors influencing the decline in adolescent smoking that this study did not  
52  
53 address. For example, it is possible that changes in the social meaning of smoking<sup>48 49</sup> and the  
54  
55



1  
2  
3 policy context<sup>11 50</sup> – factors that were not included in our analyses - may have played a role in  
4  
5 triggering adolescent smoking decline. For example, policy responses to rising adolescent  
6  
7 smoking in the 1990s may have influence teen smoking in NZ, as they appear to have done in  
8  
9 Australia<sup>10 11</sup> and the US.<sup>9</sup> Smoking in NZ 14-15 year olds peaked in 1999, two years after  
10  
11 the legal age of tobacco purchase was raised from 16 to 18 years of age, and a year after a  
12  
13 1998 tax increase which raised the price of a packet of 20 cigarettes by 13%.<sup>51</sup> The turning  
14  
15 point in adolescent smoking also closely followed the ‘Why start?’ mass media campaign  
16  
17 targeting youth which ran from 1996-1998. It is plausible that, collectively, these measures  
18  
19 contributed to the denormalisation of smoking, which, rather than any specific intervention,  
20  
21 may have been the trigger for adolescent smoking decline both in NZ and other jurisdictions.  
22  
23 Mass media campaigns from 2000 focusing on second hand smoke and a 2004 ban on  
24  
25 smoking in pubs and all other indoor workplaces likely contributed to the ongoing  
26  
27 denormalisation of smoking (in particular indoor smoking),<sup>52</sup> and may underpin the observed  
28  
29 decline in daily exposure to smoking in the home. As Simon Chapman has pointed out,  
30  
31 denormalisation involves an ‘interplay of continuous, uncontrolled, unmeasured, and  
32  
33 sometimes unmeasurable variables intended to influence [tobacco] consumption’, and cannot  
34  
35 be reduced to the sum of its parts.<sup>53</sup>

36  
37  
38  
39  
40 However if tobacco denormalisation, along with the other factors discussed above, explains  
41  
42 the decline in adolescent smoking, is it simply a coincidence that teen alcohol use, teen  
43  
44 pregnancy and juvenile crime have also declined over the same period, or does this suggest  
45  
46 other over-arching influences that are impacting on a range of youth risk-taking behaviours?  
47  
48

49  
50 As far as we are aware, this is the first study to explore trends in exposure to known risk  
51  
52 factors with the purpose of better understanding the drivers of adolescent smoking decline.  
53  
54 Strengths of the study include the large sample size, and the demographic similarity between  
55  
56 the sample and the Year 10 population, suggesting response bias was not a substantial issue.  
57

1  
2  
3 Systematic under- and over-representation were found to be relatively consistent over time  
4  
5 and therefore unlikely to affect trend analysis, which was the focus of our study. The methods  
6  
7 for the ASH survey were broadly consistent between years, with minor changes (e.g. a  
8  
9 change in fieldwork timing from 2011) unlikely to contribute significantly to the trends  
10  
11 observed. Since there is strong similarity between NZ and other countries at a late stage in  
12  
13 the tobacco epidemic in terms of trends in adolescent smoking and known risk factors, it is  
14  
15 likely that our conclusions may be generalisable to similar countries, but this remains to be  
16  
17 confirmed through further research.  
18  
19

20  
21 Given the complex array of factors at various levels that are known to influence smoking  
22  
23 uptake, one of the limitations of our study was the limited number of risk factors for which  
24  
25 consistent data was available. Having said that, we found that less than 1% of students  
26  
27 unexposed to any of the included risk factors were regular smokers in 2015. So while we  
28  
29 have included only a small number of risk factors, collectively they have strong predictive  
30  
31 power. The study was based on self-report questionnaire data, with its inherent limitations  
32  
33 (e.g. potential for social desirability bias, and misinterpretation of questions resulting in  
34  
35 misclassification); however recent biomarker testing of a sub-sample of ASH Year 10  
36  
37 participants indicated that the survey provides an accurate population estimate of smoking  
38  
39 prevalence.<sup>54</sup> We used school decile as a proxy for socioeconomic position (SEP), since more  
40  
41 direct measures were unavailable. Because school communities are heterogeneous, it is an  
42  
43 imperfect measure at the individual level, and residual confounding by socioeconomic status  
44  
45 is possible in our adjusted associations. Finally, it is not possible to draw causal inferences  
46  
47 based on cross-sectional data, and, much remains unknown about the mechanisms by which  
48  
49 the risk factors examined might influence adolescent behaviour.  
50  
51  
52  
53  
54  
55  
56  
57  
58  
59  
60

## Conclusions

In summary, our findings suggest that declining exposure to daily smoking in the home and older sibling smoking have contributed to the decline in adolescent smoking in New Zealand since 2002, but reduced exposure to these risk factors only partially explains the pattern observed. We hypothesise that adolescent smoking decline may have been (to some degree) self-perpetuating via a virtuous cycle of peer influence, however further research is needed to confirm this. It is likely that factors other than those in our model are at play, with changes in the social meaning of smoking, the policy context and broader socio-cultural changes all potential contributors. Further research is needed to identify other contributing factors and determine their relative importance.

## Acknowledgements

The authors wish to acknowledge the data owners, ASH New Zealand, for access to the ASH Year 10 Snapshot Survey data. The ASH Year 10 Snapshot Survey is part of the New Zealand Youth Tobacco Monitor, a national, school-based survey of young people's smoking behaviours, attitudes and associated risk factors.

We also thank the advisory group who provided project oversight, feedback, and/or technical advice. In particular we thank Rob McGee (University of Otago), Sicily Sunseri (Health Promotion Agency), and Andrew Waa (University of Otago) for feedback on earlier drafts.

## Contributorship statement

All authors contributed to the conception and design of the study. The analysis was executed by DS and JB, with oversight by RE. JB drafted the manuscript with input from all authors.

## Funding

This work was supported by a University of Otago Research Grant 507415.

### Competing interests

None declared.

### Data sharing statement

The data is owned by ASH New Zealand, and cannot be shared by the authors.

### References

1. Ministry of Health. Health Loss in New Zealand 1990-2013: A Report from the New Zealand Burden of Diseases, Injuries and Risk Factors Study. Wellington: Ministry of Health 2016.
2. Blakely T, Fawcett J, Hunt D, et al. What is the contribution of smoking and socioeconomic position to ethnic inequalities in mortality in New Zealand? *Lancet* 2006;368(9529):44-52.
3. David A, Esson K, Perucic A-M, et al. Tobacco use: equity and social determinants. In: E B, Sivasankara Kurup A, eds. Equity, social determinants and public health programmes. Geneva: World Health Organization 2010.
4. Centers for Disease Control. Preventing tobacco use among youth and young adults: A report of the Surgeon General. Atlanta, USA: Centers for Disease Control and Prevention 2012.
5. Action on Smoking and Health. ASH Year 10 Snapshot Survey: Topline Results. Auckland: Action on Smoking and Health (ASH) 2014.
6. Green MJ, Leyland AH, Sweeting H, et al. Socioeconomic position and early adolescent smoking development: evidence from the British Youth Panel Survey (1994-2008). *Tob Control* 2016;25(2):203-10. doi: 10.1136/tobaccocontrol-2014-051630
7. Action on Smoking and Health. 2014 ASH Year 10 Snapshot Survey: Māori smoking. Auckland, New Zealand: ASH 2014.
8. Ball J, Edwards R, Cook H. Why are today's adolescents less likely to smoke, drink, take drugs or have sex than those in the 1990s? 15th World Congress on Public Health. Melbourne, Australia, 2017.
9. Pampel FC, Aguilar J. Changes in Youth Smoking, 1976-2002: A Time-Series Analysis. *Youth Soc* 2008;39(4):453-79. doi: 10.1177/0044118X07308070
10. White VM, Durkin SJ, Coomber K, et al. What is the role of tobacco control advertising intensity and duration in reducing adolescent smoking prevalence? Findings from 16 years of tobacco control mass media advertising in Australia. *Tob Control* 2015;24(2):198-204. doi: 10.1136/tobaccocontrol-2012-050945
11. White VM, Warne CD, Spittal MJ, et al. What impact have tobacco control policies, cigarette price and tobacco control programme funding had on Australian adolescents' smoking? Findings over a 15-year period. *Addiction* 2011;106(8):1493-502. doi: 10.1111/j.1360-0443.2011.03429.x
12. Charlton A, Bates C. Decline in teenage smoking with rise in mobile phone ownership: hypothesis. *BMJ* 2000;321:1155.
13. Twenge JM. I Gen: Why Today's Super-Connected Kids Are Growing Up Less Rebellious, More Tolerant, Less Happy--and Completely Unprepared for Adulthood. New York: Simon and Schuster 2017.

14. Durkee T, Carli V, Floderus B, et al. Pathological Internet Use and Risk-Behaviors among European Adolescents. *Int J Environ Res Public Health* 2016;13(3):294.
15. Gommans R, Stevens GW, Finne E, et al. Frequent electronic media communication with friends is associated with higher adolescent substance use. *Int J Public Health* 2015;60(2):167-77. doi: 10.1007/s00038-014-0624-0
16. Huang GC, Okamoto J, Valente TW, et al. Effects of Media and Social Standing on Smoking Behaviors among Adolescents in China. *J Child Media* 2012;6(1):100-18. doi: 10.1080/17482798.2011.633411
17. Iannotti RJ, Kogan MD, Janssen I, et al. Patterns of adolescent physical activity, screen-based media use, and positive and negative health indicators in the U.S. and Canada. *J Adolesc Health* 2009;44(5):493-9. doi: 10.1016/j.jadohealth.2008.10.142
18. Koivusilta L, Lintonen T, Rimpela A. Mobile phone use has not replaced smoking in adolescence. *BMJ* 2003;326(7381):161.
19. Koivusilta L, Lintonen T, Rimpelä A. Intensity of mobile phone use and health compromising behaviours—how is information and communication technology connected to health-related lifestyle in adolescence? *J Adolesc* 2005;28(1):35-47.
20. Meldrum RC, Clark J. Adolescent virtual time spent socializing with peers, substance use, and delinquency. *Crime Delinq* 2015;61(8):1104-26.
21. Morioka H, Itani O, Osaki Y, et al. Association Between Smoking and Problematic Internet Use Among Japanese Adolescents: Large-Scale Nationwide Epidemiological Study. *Cyberpsychol Behav Soc Netw* 2016;19(9):557-61. doi: 10.1089/cyber.2016.0182
22. Osaki Y, Ohida T, Kanda H, et al. Mobile Phone Use does not Discourage Adolescent Smoking in Japan. *Asian Pac J Cancer Prev* 2012;13(3):1011-14. doi: 10.7314/apjcp.2012.13.3.1011
23. Steggles N, Jarvis MJ. Do mobile phones replace cigarette smoking among teenagers? *Tob Control* 2003;12(3):339-40.
24. Gauthier AH, Smeeding TM, Furstenberg FF. Are parents investing less time in children? Trends in selected industrialized countries. *Popul Dev Rev* 2004;30(4):647-72.
25. Guryan J, Hurst E, Kearney M. Parental Education and Parental Time with Children. *J Econ Perspect*, 2008;22(3):23-46.
26. Morman MT, Floyd K. A “changing culture of fatherhood”: Effects on affectionate communication, closeness, and satisfaction in men's relationships with their fathers and their sons. *West J Commun* 2002;66(4):395-411. doi: 10.1080/10570310209374746
27. Thapa A, Cohen J, Guffey S, et al. A Review of School Climate Research. *Rev Educ Res* 2013;83(3):357-85. doi: 10.3102/0034654313483907
28. Cornell D, Huang F. Authoritative School Climate and High School Student Risk Behavior: A Cross-sectional Multi-level Analysis of Student Self-Reports. *J Youth Adolesc* 2016;45(11):2246-59. doi: 10.1007/s10964-016-0424-3
29. Jamal F, Fletcher A, Harden A, et al. The school environment and student health: a systematic review and meta-ethnography of qualitative research. *BMC public health* 2013;13(1):798.
30. Settersten Jr RA, Ray B. What's going on with young people today? The long and twisting path to adulthood. *Future Child* 2010;20(1):19-41.
31. Rea D, Callister P. The changing nature of young people's transitions in New Zealand. Wellington: Institute of Policy Studies, Victoria University, 2009.
32. Tyas SL, Pederson LL. Psychosocial factors related to adolescent smoking: a critical review of the literature. *Tob Control* 1998;7(4):409-20.
33. Darling H, Reeder A. Is exposure to secondhand tobacco smoke in the home related to daily smoking among youth? *Aust N Z J Public Health* 2003;27(6):655-56.
34. Waa A, Edwards R, Newcombe R, et al. Parental behaviours, but not parental smoking, influence current smoking and smoking susceptibility among 14 and 15 year-old children. *Aust N Z J Public Health* 2011;35(6):530-36.

- 1  
2  
3 35. Becklake MR, Ghezzi H, Ernst P. Childhood predictors of smoking in adolescence: a follow-up  
4 study of Montreal schoolchildren. *CMAJ* 2005;173(4):377-9. doi: 10.1503/cmaj.1041428
- 5 36. Wang MP, Ho SY, Lam TH. Parental smoking, exposure to secondhand smoke at home, and  
6 smoking initiation among young children. *Nicotine Tob Res* 2011;13(9):827-32. doi:  
7 10.1093/ntr/ntr083
- 8 37. Voorhees CC, Ye C, Carter-Pokras O, et al. Peers, tobacco advertising, and secondhand smoke  
9 exposure influences smoking initiation in diverse adolescents. *Am J Health Prom*  
10 2011;25(3):e1-e11.
- 11 38. Selya AS, Dierker LC, Rose JS, et al. Risk factors for adolescent smoking: parental smoking and the  
12 mediating role of nicotine dependence. *Drug Alcohol Depend* 2012;124(3):311-8. doi:  
13 10.1016/j.drugalcdep.2012.02.004
- 14 39. Belanger M, O'Loughlin J, Okoli CT, et al. Nicotine dependence symptoms among young never-  
15 smokers exposed to secondhand tobacco smoke. *Addict Behav* 2008;33(12):1557-63. doi:  
16 10.1016/j.addbeh.2008.07.011
- 17 40. Schuck K, Kleinjan M, Otten R, et al. Responses to environmental smoking in never-smoking  
18 children: can symptoms of nicotine addiction develop in response to environmental tobacco  
19 smoke exposure? *J Psychopharmacol* 2013;27(6):533-40. doi: 10.1177/0269881112466184
- 20 41. Okoli CTC, Kelly T, Hahn EJ. Secondhand smoke and nicotine exposure: A brief review. *Addict*  
21 *Behav* 2007;32(10):1977-88. doi: <http://dx.doi.org/10.1016/j.addbeh.2006.12.024>
- 22 42. Brody AL, Mandelkern MA, London ED, et al. Effect of secondhand smoke on occupancy of  
23 nicotinic acetylcholine receptors in brain. *Arch Gen Psychiatry* 2011;68(9):953-60. doi:  
24 10.1001/archgenpsychiatry.2011.51
- 25 43. Action on Smoking and Health. 2014 ASH Year 10 Snapshot Survey: Information and  
26 methodology. Auckland: Action on Smoking and Health, 2014.
- 27 44. Ministry of Education. School deciles: Ministry of Education; 2017 Available from:  
28 [https://education.govt.nz/school/running-a-school/resourcing/operational-funding/school-](https://education.govt.nz/school/running-a-school/resourcing/operational-funding/school-decile-ratings/)  
29 [decile-ratings/](https://education.govt.nz/school/running-a-school/resourcing/operational-funding/school-decile-ratings/) (Accessed 29 June 2017).
- 30 45. Syamlal G, Mazurek JM, Hendricks SA, et al. Cigarette smoking trends among U.S. working adult  
31 by industry and occupation: findings from the 2004-2012 National Health Interview Survey.  
32 *Nicotine Tob Res* 2015;17(5):599-606. doi: 10.1093/ntr/ntu185 [published Online First:  
33 2014/09/23]
- 34 46. Graham H. Smoking, Stigma and Social Class. *Journal of Social Policy* 2011;41(01):83-99. doi:  
35 10.1017/s004727941100033x
- 36 47. Okoli CT, Kodet J. A systematic review of secondhand tobacco smoke exposure and smoking  
37 behaviors: Smoking status, susceptibility, initiation, dependence, and cessation. *Addict*  
38 *Behav* 2015;47:22-32. doi: 10.1016/j.addbeh.2015.03.018
- 39 48. Plumridge EW, Fitzgerald LJ, Abel GM. Performing coolness: smoking refusal and adolescent  
40 identities. *Health Education Research* 2002;17(2):167-79.
- 41 49. Nichter M. Smoking: what does culture have to do with it? *Addiction* 2003;98(s1):139-45.
- 42 50. Dessaix A, Maag A, McKenzie J, et al. Factors influencing reductions in smoking among Australian  
43 adolescents. *Public Health Res Pract* 2016;26(1) doi: 10.17061/phrp2611605
- 44 51. O'Dea D, Thomson G. Report on Tobacco Taxation in New Zealand Volume I. Wellington, New  
45 Zealand, ASH & Smokefree Coalition 2007.
- 46 52. Edwards R, Thomson G, Wilson N, et al. After the smoke has cleared: evaluation of the impact of  
47 a new national smoke-free law in New Zealand. *Tob Control* 2008;17(1):e2. doi:  
48 10.1136/tc.2007.020347 [published Online First: 2008/01/26]
- 49 53. Chapman S. Unravelling gossamer with boxing gloves: problems in explaining the decline in  
50 smoking. *BMJ* 2003;307:429-32.
- 51 54. Sunseri S, White J. Class, please spit: using a biochemical validation of self-reported smoking in a  
52 national sample of young people. 13th Behavioural Research in Cancer Control Conference.  
53 Melbourne, Australia: Cancer Council Victoria, 2017.
- 54  
55  
56  
57  
58  
59  
60



Fig 1a. Trends in adolescent and parental smoking prevalence, 2002-2015

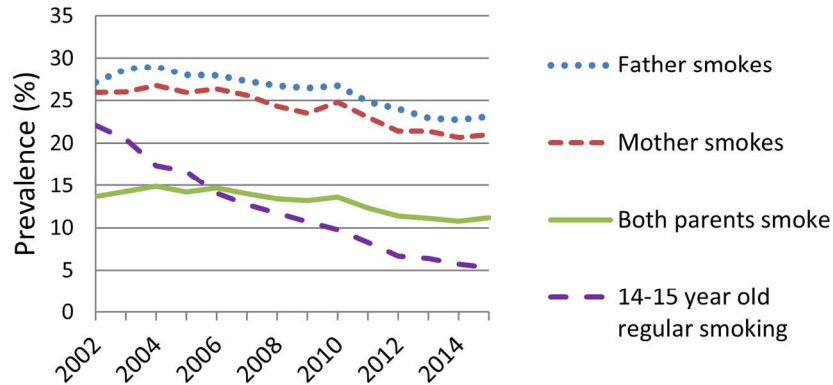

Fig 1b. Trends in exposure to other risk factors, 2002-2015

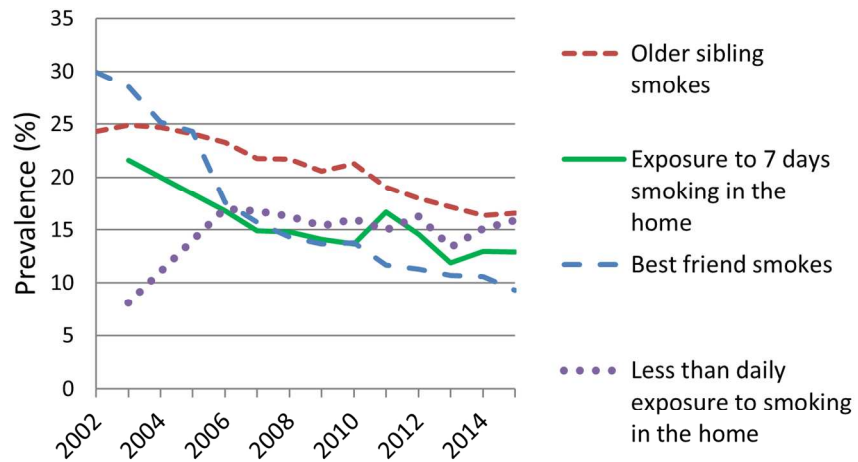

Fig 1: Prevalence of regular smoking and risk factors in 14-15 year olds, 2002 to 2015.

137x178mm (300 x 300 DPI)

1  
2  
3  
4  
5  
6  
7  
8  
9  
10  
11  
12  
13  
14  
15  
16  
17  
18  
19  
20  
21  
22  
23  
24  
25  
26  
27  
28  
29  
30  
31  
32  
33  
34  
35  
36  
37  
38  
39  
40  
41  
42  
43  
44  
45  
46  
47  
48  
49  
50  
51  
52  
53  
54  
55  
56  
57  
58  
59  
60

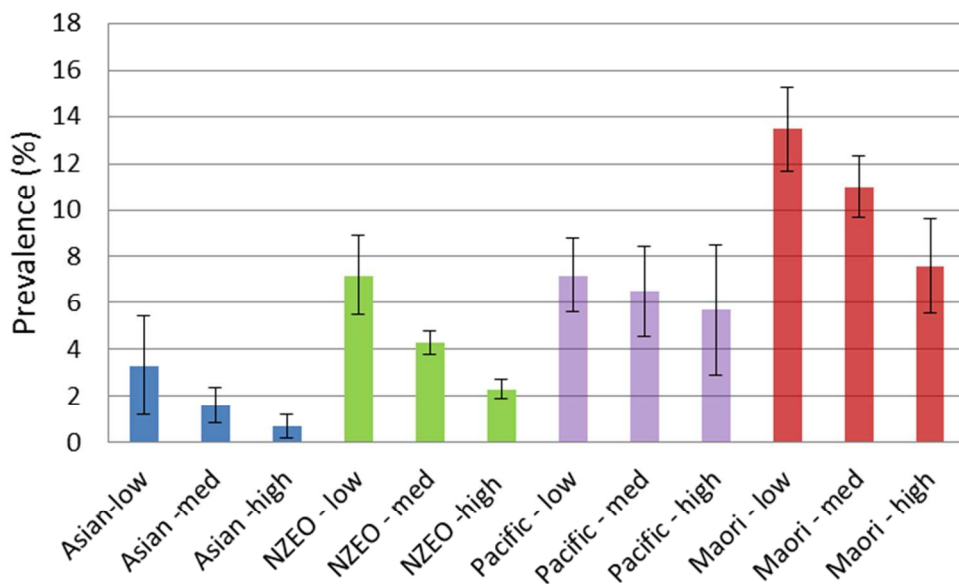

Fig 2: Regular smoking in 14-15 year olds, stratified by ethnicity and school decile, 2015.

242x153mm (300 x 300 DPI)

Review only



1  
2  
3  
4  
5  
6  
7  
8  
9  
10  
11  
12  
13  
14  
15  
16  
17  
18  
19  
20  
21  
22  
23  
24  
25  
26  
27  
28  
29  
30  
31  
32  
33  
34  
35  
36  
37  
38  
39  
40  
41  
42  
43  
44  
45  
46

**SUPPLEMENTARY MATERIAL**

**Characteristics of the sample**

*Supplementary Table S1: Sample characteristics and comparison with Year 10 population (% absolute difference)*

|             |                     | Total | Age      |          | Sex   |        | School Decile |        |       | Ethnicity |       |         |       |
|-------------|---------------------|-------|----------|----------|-------|--------|---------------|--------|-------|-----------|-------|---------|-------|
|             |                     |       | 14 years | 15 years | Male  | Female | Low           | Medium | High  | NZEO      | Maori | Pacific | Asian |
| <b>2002</b> | <b>N</b>            | 28088 | 13161    | 14927    | 13911 | 14177  | 4505          | 13007  | 10576 | 19395     | 4670  | 1833    | 2190  |
|             | <b>%</b>            |       | 47%      | 53%      | 50%   | 50%    | 16%           | 46%    | 38%   | 69%       | 17%   | 7%      | 8%    |
|             | <b>dif from pop</b> |       |          |          | -1%   | 1%     | -4%           | 2%     | 4%    |           |       |         |       |
| <b>2003</b> | <b>N</b>            | 31377 | 14585    | 16792    | 15492 | 15885  | 5272          | 14274  | 11831 | 20716     | 5425  | 2174    | 3062  |
|             | <b>%</b>            |       | 46%      | 54%      | 49%   | 51%    | 17%           | 45%    | 38%   | 66%       | 17%   | 7%      | 10%   |
|             | <b>dif from pop</b> |       |          |          | -2%   | 2%     | -3%           | 3%     | 5%    |           |       |         |       |
| <b>2004</b> | <b>N</b>            | 30807 | 18668    | 12139    | 14996 | 15811  | 5889          | 13373  | 11545 | 19888     | 5694  | 2244    | 2981  |
|             | <b>%</b>            |       | 61%      | 39%      | 49%   | 51%    | 19%           | 43%    | 37%   | 65%       | 18%   | 7%      | 10%   |
|             | <b>dif from pop</b> |       |          |          | -2%   | 2%     | -1%           | 1%     | 4%    |           |       |         |       |
| <b>2005</b> | <b>N</b>            | 31833 | 15901    | 15932    | 15211 | 16622  | 4719          | 15374  | 11740 | 21176     | 5435  | 2172    | 3050  |
|             | <b>%</b>            |       | 50%      | 50%      | 48%   | 52%    | 15%           | 48%    | 37%   | 67%       | 17%   | 7%      | 10%   |
|             | <b>dif from pop</b> |       |          |          | -3%   | 3%     | -3%           | 2%     | 5%    |           |       |         |       |
| <b>2006</b> | <b>N</b>            | 31690 | 19996    | 11694    | 15642 | 16048  | 4416          | 15935  | 11339 | 20161     | 6237  | 2252    | 3040  |
|             | <b>%</b>            |       | 63%      | 37%      | 49%   | 51%    | 14%           | 50%    | 36%   | 64%       | 20%   | 7%      | 10%   |
|             | <b>dif from</b>     |       |          |          | -2%   | 2%     | -4%           | 4%     | 4%    | 2%        | -2%   | -1%     | 1%    |

|             |                     |       |       |       |       |       |      |       |       |       |      |      |      |
|-------------|---------------------|-------|-------|-------|-------|-------|------|-------|-------|-------|------|------|------|
|             | <b>pop</b>          |       |       |       |       |       |      |       |       |       |      |      |      |
| <b>2007</b> | <b>N</b>            | 25109 | 16213 | 8896  | 11988 | 13121 | 3558 | 11062 | 10489 | 16187 | 4653 | 1804 | 2465 |
|             | <b>%</b>            |       | 65%   | 35%   | 48%   | 52%   | 14%  | 44%   | 42%   | 64%   | 19%  | 7%   | 10%  |
|             | <b>dif from pop</b> |       |       |       | -4%   | 4%    | -4%  | -2%   | 10%   | 5%    | -3%  | -2%  | 0%   |
| <b>2008</b> | <b>N</b>            | 29682 | 18395 | 11287 | 14462 | 15220 | 4732 | 12875 | 12075 | 17913 | 5552 | 2863 | 3354 |
|             | <b>%</b>            |       | 62%   | 38%   | 49%   | 51%   | 16%  | 43%   | 41%   | 60%   | 19%  | 10%  | 11%  |
|             | <b>dif from pop</b> |       |       |       | -3%   | 3%    | -2%  | 0%    | 3%    | 1%    | -3%  | 1%   | 1%   |
| <b>2009</b> | <b>N</b>            | 24755 | 15977 | 8778  | 11607 | 13148 | 3235 | 11029 | 10491 | 15410 | 4304 | 2211 | 2830 |
|             | <b>%</b>            |       | 65%   | 35%   | 47%   | 53%   | 13%  | 45%   | 42%   | 62%   | 17%  | 9%   | 11%  |
|             | <b>dif from pop</b> |       |       |       | -4%   | 4%    | -5%  | 1%    | 4%    | 4%    | -5%  | 0%   | 2%   |
| <b>2010</b> | <b>N</b>            | 31696 | 19725 | 11971 | 16636 | 15060 | 5111 | 14049 | 12536 | 18806 | 6315 | 3041 | 3534 |
|             | <b>%</b>            |       | 62%   | 38%   | 52%   | 48%   | 16%  | 44%   | 40%   | 59%   | 20%  | 10%  | 11%  |
|             | <b>dif from pop</b> |       |       |       | 1%    | -1%   | -2%  | 1%    | 2%    | 2%    | -3%  | 0%   | 1%   |
| <b>2011</b> | <b>N</b>            | 26028 | 21390 | 4638  | 12462 | 13566 | 3720 | 10843 | 11465 | 15669 | 4995 | 2453 | 2911 |
|             | <b>%</b>            |       | 82%   | 18%   | 48%   | 52%   | 14%  | 42%   | 44%   | 60%   | 19%  | 9%   | 11%  |
|             | <b>dif from pop</b> |       |       |       | -3%   | 3%    | -4%  | -1%   | 6%    | 3%    | -4%  | 0%   | 0%   |
| <b>2012</b> | <b>N</b>            | 30396 | 25098 | 5298  | 14918 | 15478 | 4982 | 12461 | 12953 | 17878 | 5800 | 3048 | 3670 |
|             | <b>%</b>            |       | 83%   | 17%   | 49%   | 51%   | 16%  | 41%   | 43%   | 59%   | 19%  | 10%  | 12%  |
|             | <b>dif from pop</b> |       |       |       | -2%   | 2%    | -1%  | -2%   | 4%    | 4%    | -3%  | 1%   | 1%   |
| <b>2013</b> | <b>N</b>            | 27014 | 22126 | 4888  | 13546 | 13468 | 4049 | 10875 | 12090 | 16146 | 5111 | 2628 | 3129 |
|             | <b>%</b>            |       | 82%   | 18%   | 50%   | 50%   | 15%  | 40%   | 45%   | 60%   | 19%  | 10%  | 12%  |
|             | <b>dif from pop</b> |       |       |       | -1%   | 1%    | -3%  | -2%   | 5%    | 3%    | -4%  | 0%   | 1%   |
| <b>2014</b> | <b>N</b>            | 29303 | 24206 | 5097  | 14164 | 15139 | 4359 | 12836 | 12108 | 16847 | 5779 | 2952 | 3725 |

|             |              |       |       |      |       |       |      |       |      |       |      |      |      |
|-------------|--------------|-------|-------|------|-------|-------|------|-------|------|-------|------|------|------|
|             | %            |       | 83%   | 17%  | 48%   | 52%   | 15%  | 44%   | 41%  | 57%   | 20%  | 10%  | 13%  |
|             | dif from pop |       |       |      | -3%   | 3%    | -3%  | 2%    | 2%   | 2%    | -4%  | 1%   | 1%   |
| <b>2015</b> | <b>N</b>     | 20443 | 16630 | 3813 | 10155 | 10288 | 3540 | 10024 | 6879 | 12123 | 4215 | 1884 | 2221 |
|             | %            |       | 81%   | 19%  | 50%   | 50%   | 17%  | 49%   | 34%  | 59%   | 21%  | 9%   | 11%  |
|             | dif from pop |       |       |      | -2%   | 2%    | -2%  | 5%    | -2%  | 4%    | -3%  | 0%   | -1%  |

Notes: Population data is based on Ministry of Education (MoE) records which are available online at:

<https://www.educationcounts.govt.nz/statistics/schooling/student-numbers/6028>.

Ethnicity data is not available from MoE prior to 2006, so ethnic comparison of population and sample is not possible 2002-2005.

Comparison between sample and population on age of students (14 or 15 years) is not shown since MoE data is measured at the midpoint in the year, whereas survey fieldwork dates differ slightly from year to year, and as a result meaningful comparison is not possible.

## Smoking prevalence by ethnicity, school decile and gender

Supplementary Figure S1: Prevalence of regular smoking in 14-15 year olds by prioritised ethnicity, 2002 to 2015

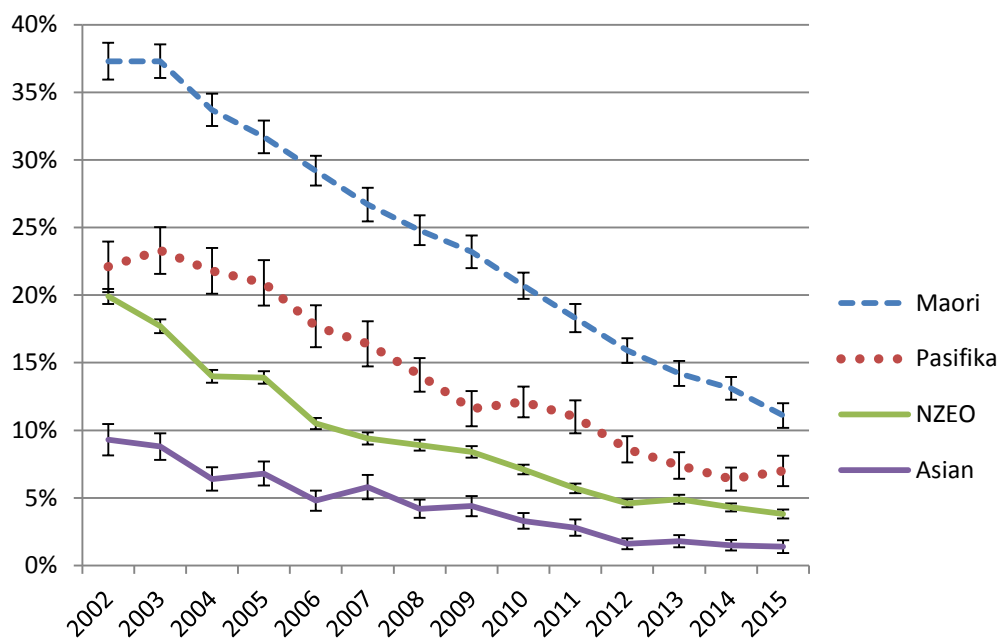

Supplementary Figure S2: Prevalence of regular smoking in 14-15 year olds by school decile, 2002 to 2015

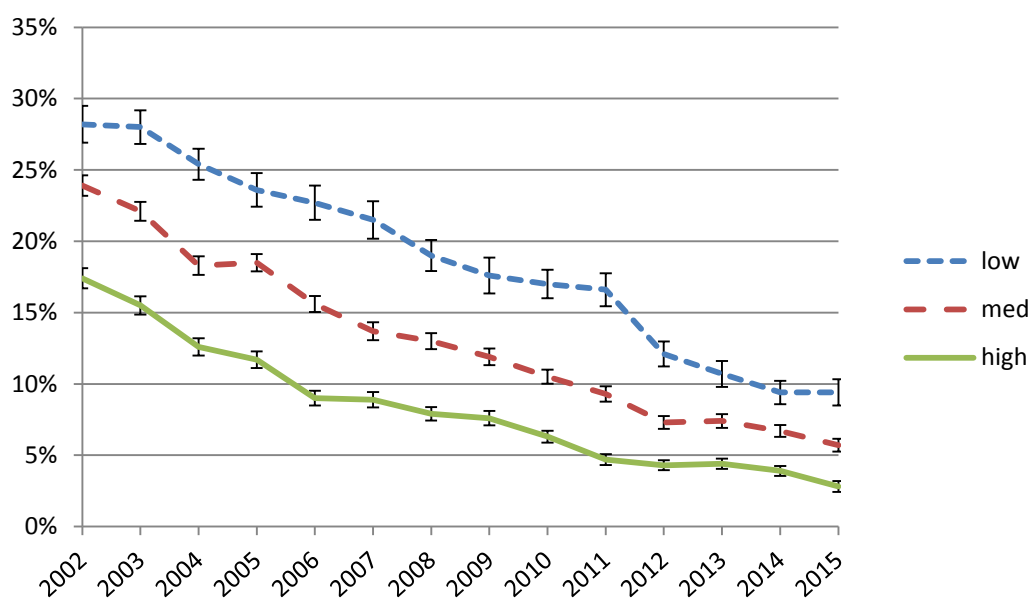

Notes: Low decile = most deprived. High decile = least deprived.

School decile is calculated by the Ministry of Education for purposes of funding allocation, and is a school-level measure of the socioeconomic position of a school's student community. Details of how school decile is calculated are available on the Ministry of Education website:

<https://www.education.govt.nz/school/running-a-school/resourcing/operational-funding/school-decile-ratings/>

Supplementary Figure S3: Prevalence of regular smoking in 14-15 year olds by gender, 2002 to 2015

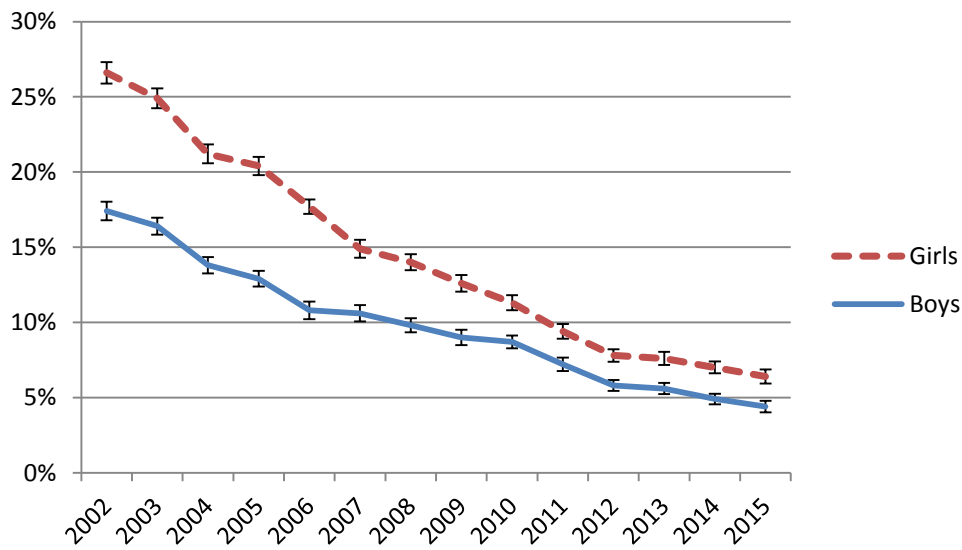

### Changes in exposure to risk factors over time, by ethnicity and school decile

Supplementary Figure S4: Proportion reporting at least one parent smokes by ethnicity, 2002 to 2015

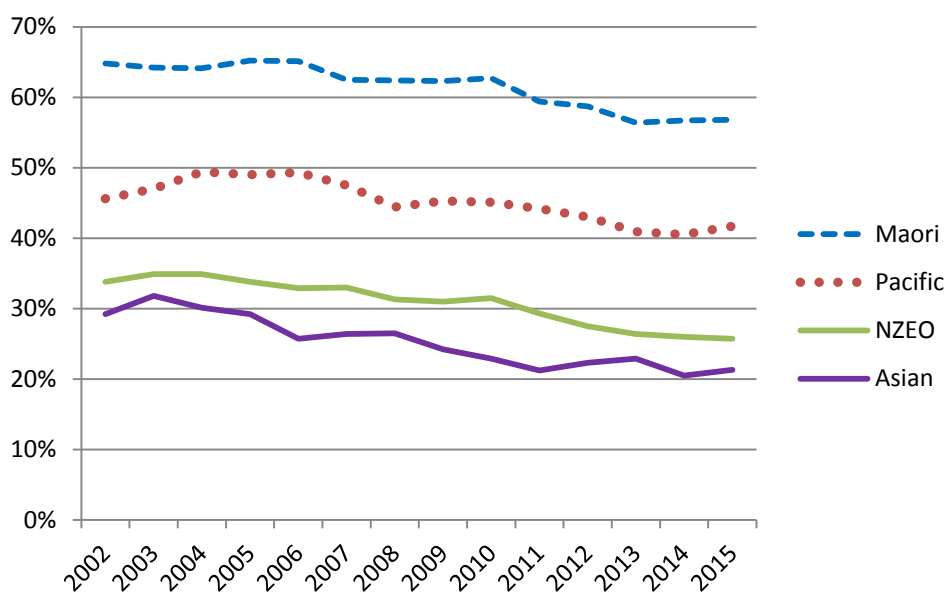

Supplementary Figure S5: Proportion reporting at least one parent smokes by school decile, 2002 to 2015

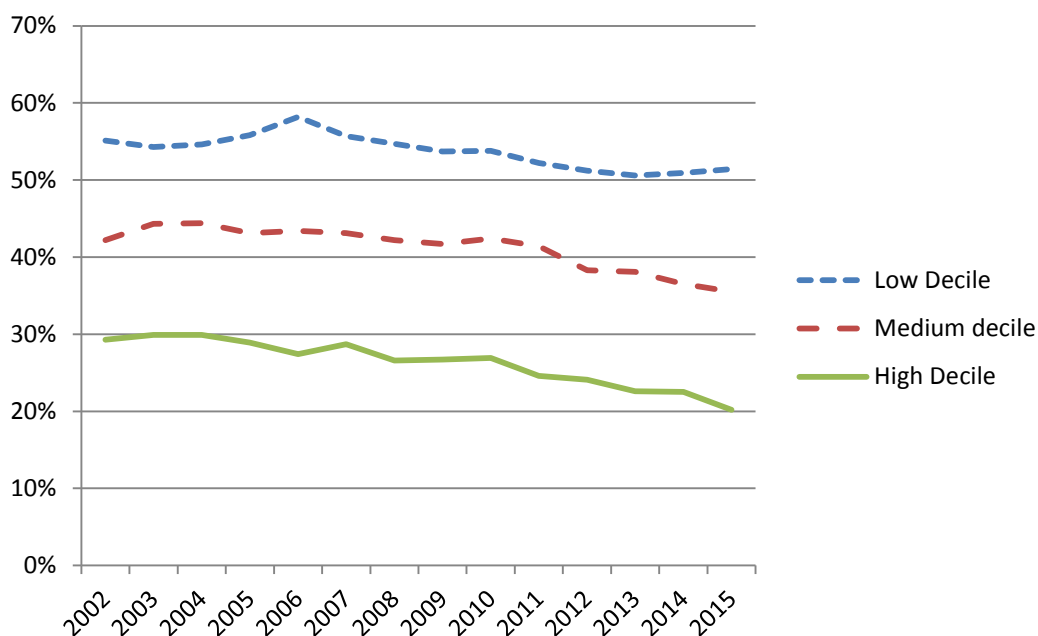

Supplementary Figure S6: Proportion reporting older sibling(s) smoke, by ethnicity, 2002 to 2015.

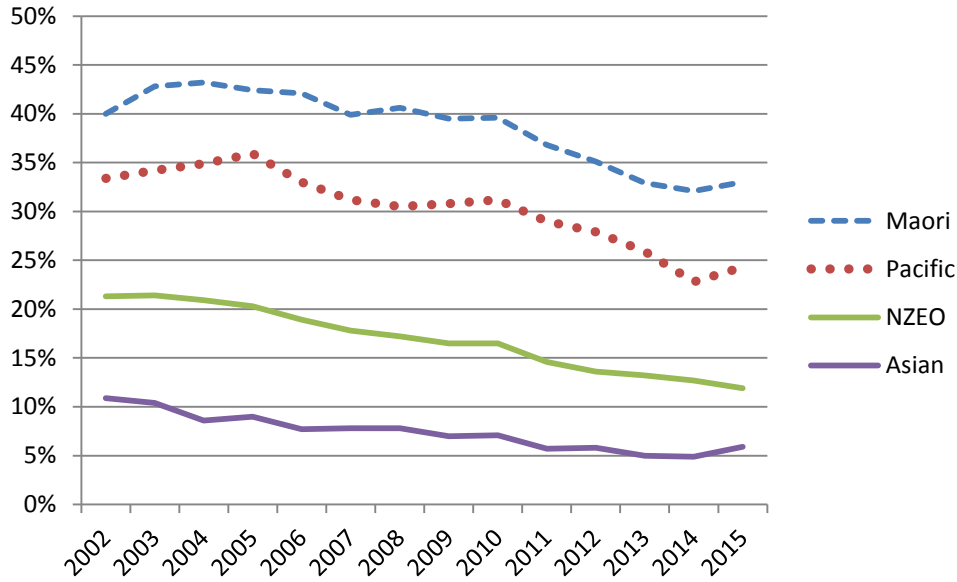

Supplementary Figure S7: Proportion reporting older sibling(s) smoke, by school decile, 2002 to 2015.

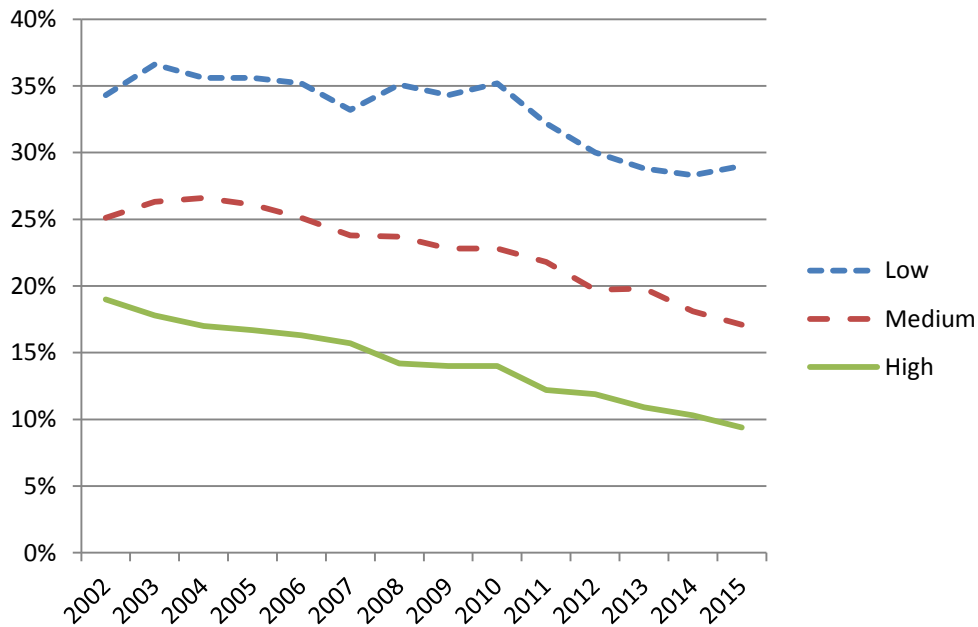

Supplementary Figure S8: Proportion reporting best friend smokes, by ethnicity, 2002 to 2015.

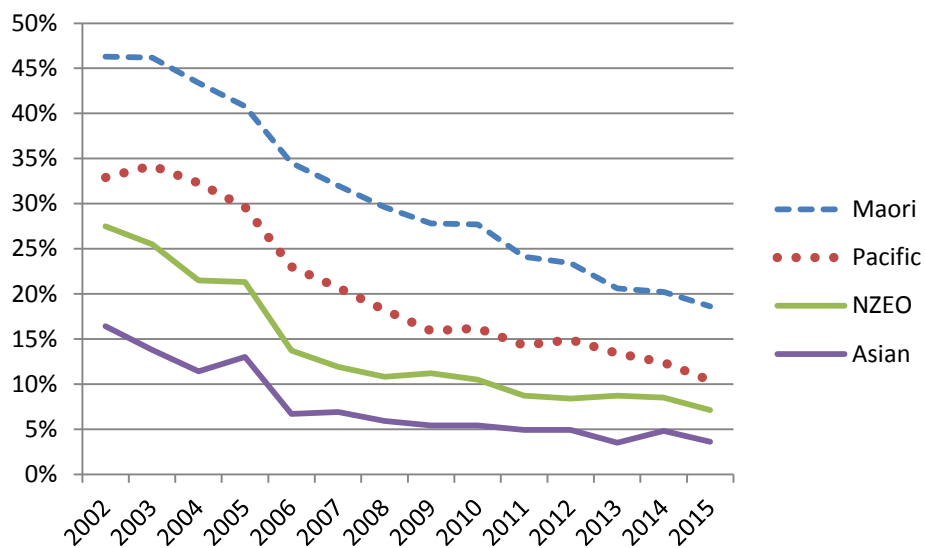

Supplementary Figure S9: Proportion reporting best friend smokes, by school decile, 2002 to 2015.

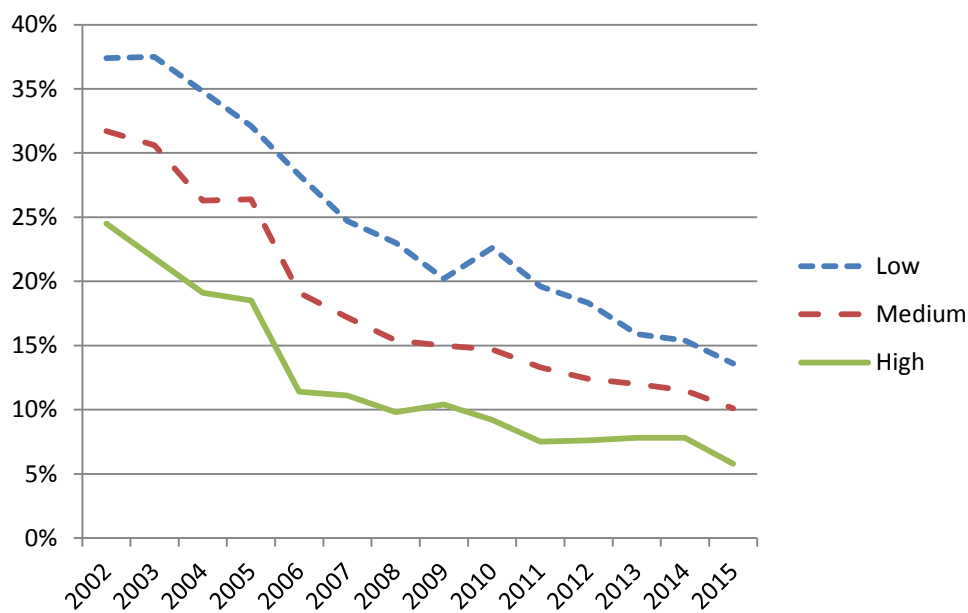



Supplementary Figure S9: Proportion reporting daily exposure to smoking in the home, by ethnicity, 2002 to 2015.

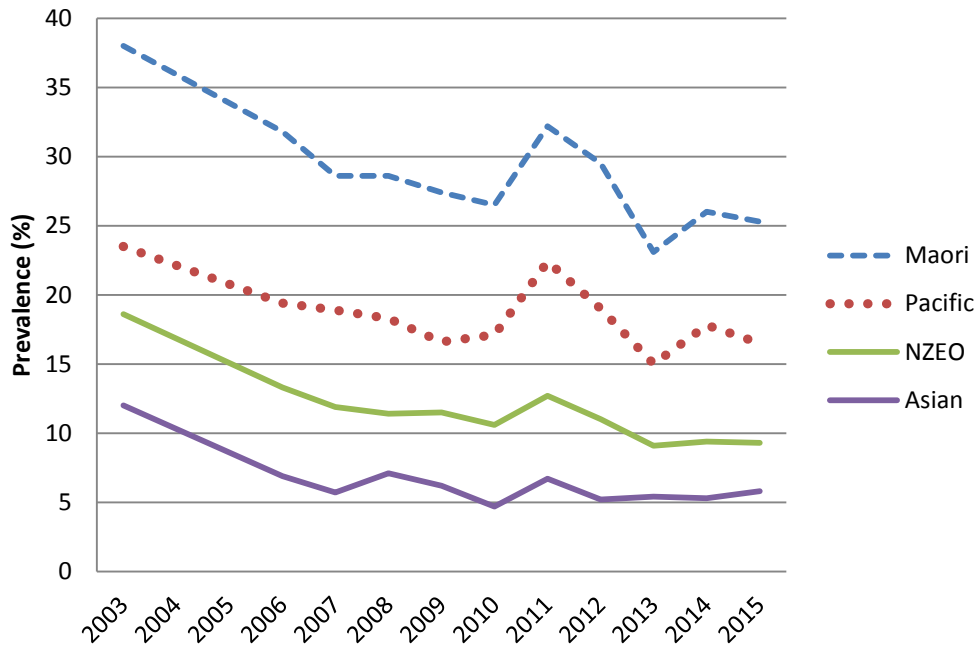

Supplementary Figure S10: Proportion reporting daily exposure to smoking in the home, by school decile, 2002 to 2015.

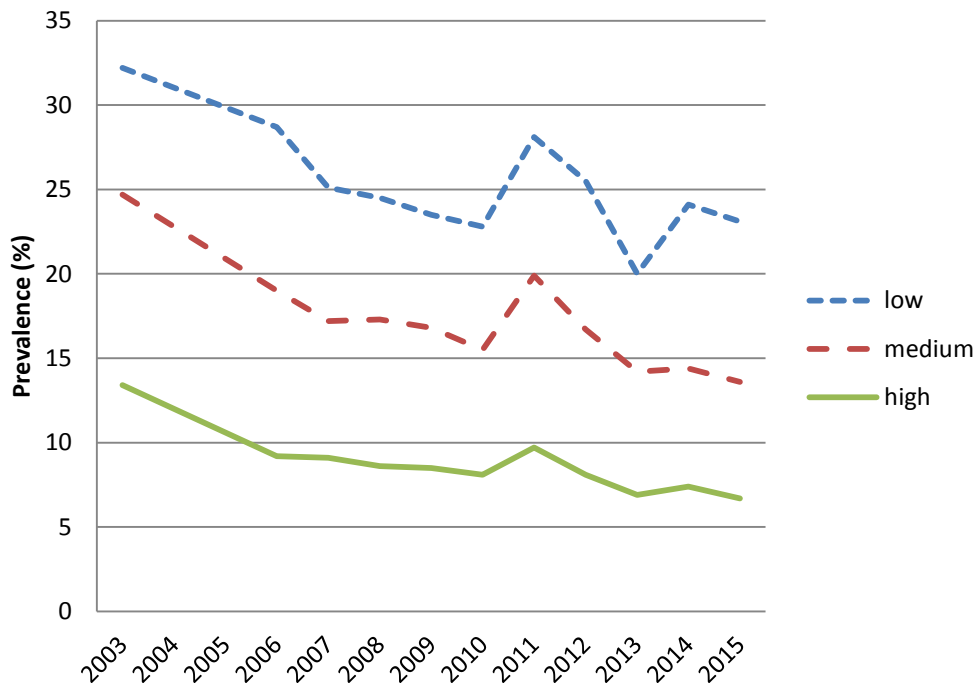

## Testing for difference over time in odds ratios

To test whether odds ratios changed significantly between 2003 and 2015, we re-ran the GLIMMIX multivariable analysis using the data from years 2003 and 2015 only. We then tested whether there was an interaction effect between year and the risk factors in the model. The results were:

Table S2: Interaction effects between risk factors and year

| Type III Tests of Fixed Effects                                |           |           |            |        |
|----------------------------------------------------------------|-----------|-----------|------------|--------|
| Effect                                                         | Num<br>DF | Den<br>DF | F<br>Value | Pr > F |
| Age                                                            | 1         | 51799     | 28.01      | <.0001 |
| Gender                                                         | 1         | 7230      | 91.49      | <.0001 |
| School decile (low, med, high)                                 | 2         | 313.7     | 6.78       | 0.0013 |
| Ethnicity (prioritised)                                        | 1         | 45690     | 1.93       | 0.1650 |
| Parental smoking                                               | 3         | 51799     | 10.66      | <.0001 |
| Sibling smoking                                                | 1         | 51799     | 255.85     | <.0001 |
| Best friend smoking                                            | 1         | 51799     | 3280.99    | <.0001 |
| Exposure to smoking in the home (none, daily, less than daily) | 2         | 51799     | 119.98     | <.0001 |
| Year                                                           | 1         | 17216     | 451.36     | <.0001 |
| Year*parental smoking                                          | 3         | 51799     | 0.32       | 0.8078 |
| Year*sibling smoking                                           | 1         | 51799     | 3.41       | 0.0650 |
| Year*best friend smoking                                       | 1         | 51799     | 20.18      | <.0001 |
| Year*exposure to smoking in the home.                          | 2         | 51799     | 15.30      | <.0001 |

Based on these findings we can conclude that the ORs (i.e. the association between risk factors and regular smoking) differed between 2003 and 2015 for *best friend smoking* and *exposure to smoking in the home*, as both interactions were statistically significant at the  $P < 0.0001$  level.

## Associations between risk factors and regular smoking in Māori adolescents, 2003 and 2015

Supplementary Table S3: Associations between risk factors and regular smoking among Māori adolescents, 2003 and 2015, expressed as odds ratios and 95% confidence intervals.

|                                                            | MĀORI                  |                      |                          |              |                      |                          |
|------------------------------------------------------------|------------------------|----------------------|--------------------------|--------------|----------------------|--------------------------|
|                                                            | 2003 N=5,425           |                      |                          | 2015 N=4,215 |                      |                          |
|                                                            | Prevalence of exposure | Model 1 (unadjusted) | Model 4 (fully adjusted) | Prevalence   | Model 1 (unadjusted) | Model 4 (fully adjusted) |
| No exposure to smoking in the home (0 days)                | 52.0                   | 1.0                  | 1.0                      | 50.6         | 1.0                  | 1.0                      |
| Less than daily (1-6 days) exposure to smoking in the home | 38.0                   | 1.9 (1.6, 2.3)       | 1.6(1.3, 2.0)            | 25.3         | 3.7(2.8, 4.8)        | 2.8 (2.1, 3.9)           |
| Daily (7 days) exposure to smoking in the home             | 47.6                   | 2.7 (2.4, 3.1)       | 1.9 (1.6, 2.1)           | 49.4         | 6.9 (5.3, 8.9)       | 4.2 (3.0, 5.9)           |
| Neither parent smokes                                      | 36.0                   | 1.0                  | 1.0                      | 43.6         | 1.0                  | 1.0                      |
| Only mother smokes                                         | 20.1                   | 2.0 (1.7-2.3)        | 1.3 (1.1-1.6)            | 17.5         | 2.2 (1.6-2.9)        | 0.8 (0.5-1.1)*           |
| Only father smokes                                         | 13.8                   | 1.9 (1.6-2.3)        | 1.5 (1.2-1.8)            | 14.0         | 1.8 (1.3-2.5)        | 0.9 (0.6-1.3)*           |
| Both parents smoke                                         | 30.2                   | 2.7 (2.3-3.1)        | 1.2 (1.0-1.4)*           | 24.8         | 3.7 (2.9-4.7)        | 0.9 (0.7-1.3)*           |
| Older sibling smokes                                       | 42.5                   | 2.4 (2.1-2.7)        | 1.6 (1.4-1.9)            | 32.6         | 2.9 (2.4-3.5)        | 1.5 (1.2-1.9)            |
| Best friend smokes                                         | 46.0                   | 6.8 (6.0-7.8)        | 5.5 (4.8-6.3)            | 18.5         | 11.2 (9.0-13.4)      | 8.2 (6.5-10.2)           |

Notes: Fully adjusted model includes age, sex, school decile, past week exposure to smoking in the home (none, less than daily, daily), parental smoking (neither, mother only, father only, both), older sibling smokes, best friend smokes.

All associations are statistically significant at the 95% confidence level except those marked with an asterisk (\*)

### Trends in associations between risk factors and regular smoking, 2003 to 2015.

Supplementary Figure S11: Fully adjusted odds ratios for key risk factors, 2003 to 2015.

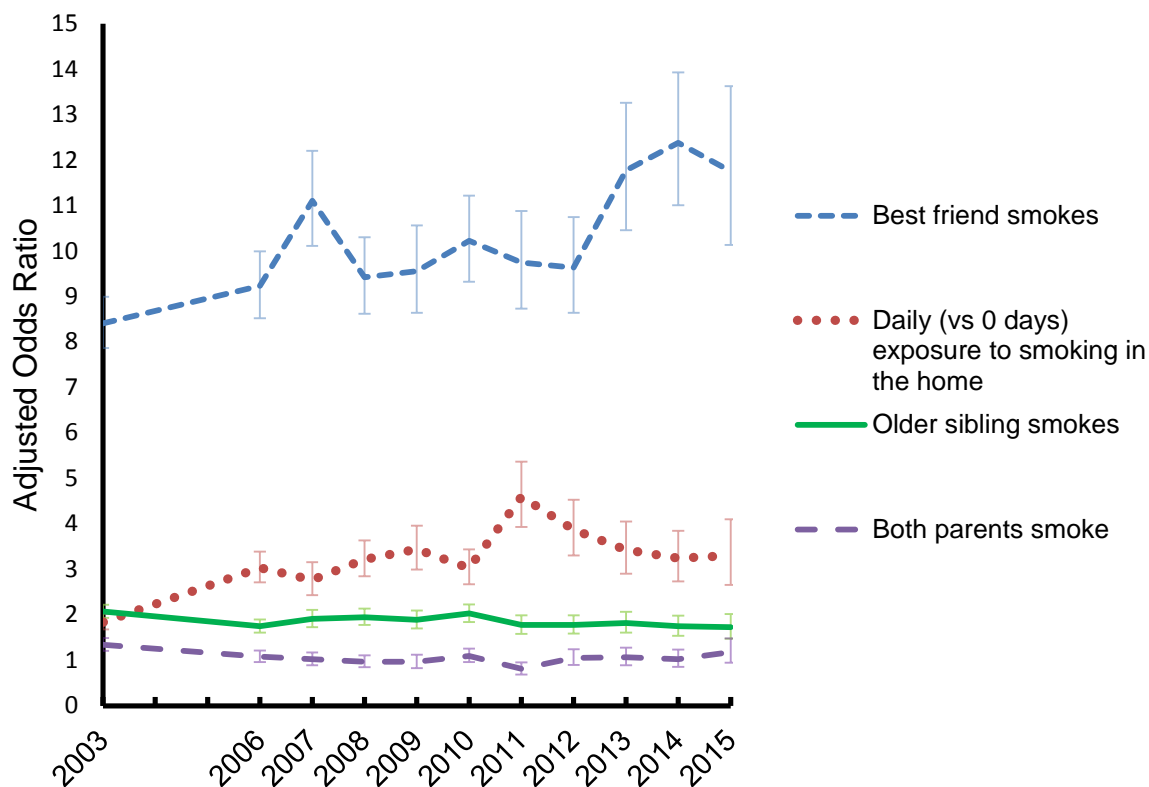

STROBE Statement—Checklist of items that should be included in reports of *cross-sectional studies*

|                           | Item No | Recommendation                                                                                                                                                                                    | Page no. |
|---------------------------|---------|---------------------------------------------------------------------------------------------------------------------------------------------------------------------------------------------------|----------|
| <b>Title and abstract</b> | 1       | (a) Indicate the study's design with a commonly used term in the title or the abstract                                                                                                            | 1        |
|                           |         | (b) Provide in the abstract an informative and balanced summary of what was done and what was found                                                                                               | 2        |
| <b>Introduction</b>       |         |                                                                                                                                                                                                   |          |
| Background/rationale      | 2       | Explain the scientific background and rationale for the investigation being reported                                                                                                              | 3-6      |
| Objectives                | 3       | State specific objectives, including any prespecified hypotheses                                                                                                                                  | 6        |
| <b>Methods</b>            |         |                                                                                                                                                                                                   |          |
| Study design              | 4       | Present key elements of study design early in the paper                                                                                                                                           | 6-7      |
| Setting                   | 5       | Describe the setting, locations, and relevant dates, including periods of recruitment, exposure, follow-up, and data collection                                                                   | 6-8      |
| Participants              | 6       | (a) Give the eligibility criteria, and the sources and methods of selection of participants                                                                                                       | 7-8      |
| Variables                 | 7       | Clearly define all outcomes, exposures, predictors, potential confounders, and effect modifiers. Give diagnostic criteria, if applicable                                                          | 9-10     |
| Data sources/ measurement | 8*      | For each variable of interest, give sources of data and details of methods of assessment (measurement). Describe comparability of assessment methods if there is more than one group              | 9-10     |
| Bias                      | 9       | Describe any efforts to address potential sources of bias                                                                                                                                         | NA       |
| Study size                | 10      | Explain how the study size was arrived at                                                                                                                                                         | 7-8      |
| Quantitative variables    | 11      | Explain how quantitative variables were handled in the analyses. If applicable, describe which groupings were chosen and why                                                                      | 9-10     |
| Statistical methods       | 12      | (a) Describe all statistical methods, including those used to control for confounding                                                                                                             | 10-11    |
|                           |         | (b) Describe any methods used to examine subgroups and interactions                                                                                                                               | 10-11    |
|                           |         | (c) Explain how missing data were addressed                                                                                                                                                       | 7        |
|                           |         | (d) If applicable, describe analytical methods taking account of sampling strategy                                                                                                                | 10.      |
|                           |         | (e) Describe any sensitivity analyses                                                                                                                                                             | NA       |
| <b>Results</b>            |         |                                                                                                                                                                                                   |          |
| Participants              | 13*     | (a) Report numbers of individuals at each stage of study—eg numbers potentially eligible, examined for eligibility, confirmed eligible, included in the study, completing follow-up, and analysed | 7-8      |
|                           |         | (b) Give reasons for non-participation at each stage                                                                                                                                              | NA       |
|                           |         | (c) Consider use of a flow diagram                                                                                                                                                                | NA       |
| Descriptive data          | 14*     | (a) Give characteristics of study participants (eg demographic, clinical, social) and information on exposures and potential confounders                                                          | 8+Supl   |
|                           |         | (b) Indicate number of participants with missing data for each variable of interest                                                                                                               | NA       |
| Outcome data              | 15*     | Report numbers of outcome events or summary measures                                                                                                                                              | 11       |

|    |                          |    |                                                                         |
|----|--------------------------|----|-------------------------------------------------------------------------|
| 1  |                          |    |                                                                         |
| 2  | Main results             | 16 | (a) Give unadjusted estimates and, if applicable, confounder-adjusted   |
| 3  |                          |    | estimates and their precision (eg, 95% confidence interval). Make       |
| 4  |                          |    | clear which confounders were adjusted for and why they were             |
| 5  |                          |    | included                                                                |
| 6  |                          |    | 12-15                                                                   |
| 7  |                          |    | (b) Report category boundaries when continuous variables were           |
| 8  |                          |    | categorized                                                             |
| 9  |                          |    | NA                                                                      |
| 10 |                          |    | (c) If relevant, consider translating estimates of relative risk into   |
| 11 |                          |    | absolute risk for a meaningful time period                              |
| 12 | Other analyses           | 17 | Report other analyses done—eg analyses of subgroups and                 |
| 13 |                          |    | interactions, and sensitivity analyses                                  |
| 14 |                          |    | 11-16                                                                   |
| 15 |                          |    | +Suppl                                                                  |
| 16 | <b>Discussion</b>        |    |                                                                         |
| 17 | Key results              | 18 | Summarise key results with reference to study objectives                |
| 18 |                          |    | 13-14                                                                   |
| 19 | Limitations              | 19 | Discuss limitations of the study, taking into account sources of        |
| 20 |                          |    | potential bias or imprecision. Discuss both direction and magnitude     |
| 21 |                          |    | of any potential bias                                                   |
| 22 |                          |    | 16-17                                                                   |
| 23 | Interpretation           | 20 | Give a cautious overall interpretation of results considering           |
| 24 |                          |    | objectives, limitations, multiplicity of analyses, results from similar |
| 25 |                          |    | studies, and other relevant evidence                                    |
| 26 |                          |    | 21                                                                      |
| 27 | Generalisability         | 21 | Discuss the generalisability (external validity) of the study results   |
| 28 |                          |    | 20                                                                      |
| 29 | <b>Other information</b> |    |                                                                         |
| 30 | Funding                  | 22 | Give the source of funding and the role of the funders for the present  |
| 31 |                          |    | study and, if applicable, for the original study on which the present   |
| 32 |                          |    | article is based                                                        |
| 33 |                          |    | 21                                                                      |

\*Give information separately for exposed and unexposed groups.

**Note:** An Explanation and Elaboration article discusses each checklist item and gives methodological background and published examples of transparent reporting. The STROBE checklist is best used in conjunction with this article (freely available on the Web sites of PLoS Medicine at <http://www.plosmedicine.org/>, Annals of Internal Medicine at <http://www.annals.org/>, and Epidemiology at <http://www.epidem.com/>). Information on the STROBE Initiative is available at [www.strobe-statement.org](http://www.strobe-statement.org).

# BMJ Open

## Why has adolescent smoking declined dramatically? Trend analysis using repeat cross-sectional data from New Zealand 2002-2015.

|                                 |                                                                                                                                                                                                                                                    |
|---------------------------------|----------------------------------------------------------------------------------------------------------------------------------------------------------------------------------------------------------------------------------------------------|
| Journal:                        | <i>BMJ Open</i>                                                                                                                                                                                                                                    |
| Manuscript ID                   | bmjopen-2017-020320.R2                                                                                                                                                                                                                             |
| Article Type:                   | Research                                                                                                                                                                                                                                           |
| Date Submitted by the Author:   | 05-Jul-2018                                                                                                                                                                                                                                        |
| Complete List of Authors:       | Ball, Jude; University of Otago, Wellington, Department of Public Health; University of Otago, Wellington<br>Sim, Dalice; University of Otago, Wellington, Dean's Department<br>Edwards, Richard; University of Otago, Department of Public Health |
| <b>Primary Subject Heading</b>: | Smoking and tobacco                                                                                                                                                                                                                                |
| Secondary Subject Heading:      | Public health, Paediatrics, Epidemiology                                                                                                                                                                                                           |
| Keywords:                       | PAEDIATRICS, PREVENTIVE MEDICINE, PUBLIC HEALTH, EPIDEMIOLOGY                                                                                                                                                                                      |
|                                 |                                                                                                                                                                                                                                                    |

SCHOLARONE™  
Manuscripts

1  
2  
3  
4  
5  
6  
7  
8 **Why has adolescent smoking declined dramatically? Trend analysis using repeat cross-**  
9 **sectional data from New Zealand 2002-2015.**  
10

11  
12 **Corresponding author:**  
13

14 Jude Ball

15 Public Health Department,  
16

17 University of Otago, Wellington  
18

19 PO Box 7343, Newtown, Wellington 6242  
20

21 New Zealand  
22

23 Email: [jude.ball@otago.ac.nz](mailto:jude.ball@otago.ac.nz)  
24

25 Phone: ++64 21 544 207  
26  
27  
28  
29

30 **Co-authors:**  
31

32 Dr Dalice Sim  
33

34 Dean's Department, University of Otago, Wellington  
35

36 Wellington, New Zealand  
37  
38  
39

40 Prof Richard Edwards  
41

42 Department of Public Health, University of Otago, Wellington  
43

44 Wellington, New Zealand  
45  
46  
47  
48  
49

50 **Word Count: 3874**  
51  
52  
53  
54  
55  
56  
57  
58  
59  
60



## ABSTRACT

**Objectives:** Adolescent smoking has declined in New Zealand and in many other countries since the late 1990s, yet the reasons for the decline are not well understood. We investigated the extent to which established risk factors for adolescent smoking (parental, sibling and peer smoking, and exposure to smoking in the home) explained the downward trend.

**Design:** Trend analysis of repeat cross-sectional data from an annual nationally representative survey.

**Setting:** New Zealand

**Participants:** Secondary school students aged 14-15. N=398,221

**Outcome measure:** Regular (at least monthly) smoking

**Methods:** For each risk factor (parental smoking, best friend smoking, older sibling smoking, and past week exposure to smoking in the home) we plotted prevalence of exposure, 2002 – 2015. Next, using multivariable logistic regression, we modelled the trend in regular smoking (expressed as an odds ratio for year) adjusting for age, sex, ethnicity and socioeconomic position. The risk factors were added to the model – individually and collectively - to test whether they attenuated the odds ratio for year.

**Results:** Exposure to all risk factors except ‘past week exposure to smoking in the home’ decreased between 2002 and 2015. We observed a strong downward trend in regular smoking among adolescents (odds ratio = 0.88 per year, 95% CI 0.88, 0.88,  $p < .001$ ). ‘Best friend smoking’ was the only risk factor that significantly attenuated the trend. However, due to

1  
2  
3 circularity, this factor provides an unsatisfactory explanation for population level smoking  
4  
5 decline.

6  
7  
8 **Conclusions:** The established risk factors that we explored do not appear to have contributed  
9  
10 to the remarkable decline in adolescent smoking in New Zealand between 2003 and 2015.  
11  
12 Further research is needed to assess the possible contribution of factors outside our model,  
13  
14 such as changes in the policy context, the social meaning of smoking and broader social and  
15  
16 economic conditions.  
17

## 18 19 **ARTICLE SUMMARY**

### 20 21 **Strengths and limitations of this study**

- 22  
23 • The survey has a large sample size (N=20,443 - 31,833 per year), allowing precise  
24  
25 population estimates based on individual-level data.  
26  
27
- 28  
29 • Due to data limitations, the study only includes a small number of risk factors,  
30  
31 however the risk factors included have consistently been found to be among the  
32  
33 strongest and most important predictors of adolescent smoking.  
34
- 35  
36 • Our study design (using repeat cross sectional data) does not enable causal inferences  
37  
38 to be drawn; rather our study draws on existing knowledge about the predictors of  
39  
40 adolescent smoking initiation.  
41  
42  
43  
44

## 45 **INTRODUCTION**

46  
47 Smoking is a leading cause of preventable illness and premature death<sup>1</sup> and a key driver of  
48  
49 health disparities between ethnic and socioeconomic groups.<sup>2,3</sup> Long-term tobacco use  
50  
51 typically begins with experimental smoking in adolescence,<sup>4</sup> and, internationally,  
52  
53 considerable research and policy attention has focused on understanding and preventing  
54  
55 smoking uptake in this age group.  
56  
57

1  
2  
3  
4  
5 The dramatic decline in adolescent smoking observed since the late 1990s in many high  
6 income countries is good news from a public health perspective. In New Zealand (NZ), for  
7 example, regular smoking (defined as at least monthly) among 14-15 year olds declined from a  
8 peak of 29% in 1999 to 5% in 2015, with decreases across all main ethnic groups, and a  
9 convergence between boys and girls over the period.<sup>5</sup> Over the same period, the proportion  
10 who had never smoked (i.e. not even a few puffs) rose from 32% to 79%.<sup>5</sup> However, as in  
11 other countries,<sup>6</sup> ethnic and socioeconomic disparities remain pronounced. For example Māori  
12 (indigenous) smoking prevalence in this age group was 11% in 2015 compared to 4% among  
13 non-Māori.<sup>7</sup>

14  
15  
16  
17  
18  
19  
20  
21  
22  
23  
24  
25  
26 Other countries including the USA, England and Australia have also experienced a decline in  
27 adolescent smoking from the late 1990s, following a sharp rise in the early 1990s.<sup>8</sup> It is  
28 important to understand the causes of this decline in order to help ensure it is sustained, and to  
29 enable replication in other countries. Yet little research has focused on explaining this  
30 phenomenon. Public health interventions such as increases in tobacco tax or smokefree  
31 environment legislation may have played a role,<sup>9-11</sup> but they do not fully explain the observed  
32 trends, since declines in adolescent smoking have occurred almost simultaneously in countries  
33 with widely differing regulatory contexts. This, and the fact that other adolescent risk  
34 behaviours (e.g. alcohol use, teen pregnancy) have also declined over a similar time period,<sup>8</sup>  
35 suggests broader social or cultural changes rather than specific tobacco control policies may  
36 contribute to this international trend.

37  
38  
39  
40  
41  
42  
43  
44  
45  
46  
47  
48  
49  
50  
51 Such shifts could be generated by new technologies, for example. When the use of cell phones  
52 rose and smoking fell among adolescents in the late 1990s, a causal association was  
53 hypothesised.<sup>12</sup> More recently, attention has turned to other new technologies – smartphones  
54  
55  
56  
57

1  
2  
3 and social media - and their potential role in driving generational change in attitudes and  
4  
5 behaviour.<sup>13</sup> There is face validity to the idea that these new technologies may have changed  
6  
7 the way young people socialise or project their identity, displacing the role of smoking or  
8  
9 providing less opportunity for it. However, this hypothesis is challenged by a consistent body  
10  
11 of evidence showing a *positive* association between smoking and cell phone/ internet/social  
12  
13 media use at the individual level.<sup>14-23</sup>  
14  
15

16  
17 Other major changes since the mid-90s that could potentially impact on youth behaviour  
18  
19 include changes in parenting;<sup>24-26</sup> changes in the school environment and ethos;<sup>27-29</sup> and broad  
20  
21 economic and labour market conditions resulting in young people leaving school and achieving  
22  
23 independence later than previous cohorts.<sup>30,31</sup> But before exploring these macro level  
24  
25 explanations for smoking decline, an initial step is to determine the extent to which the  
26  
27 observed trends can be explained by changing exposure to established individual-level  
28  
29 predictors of smoking initiation.  
30  
31

32  
33 Proximal risk factors for adolescent smoking have been studied extensively. Parental, sibling  
34  
35 and peer smoking have consistently been identified as key risk factors,<sup>4,32</sup> with the Surgeon  
36  
37 General's 2012 evidence review concluding that the evidence is suggestive of a causal role for  
38  
39 peer influences, and a potential causal role for parental smoking.<sup>4</sup> The review found that  
40  
41 smoking by older siblings influences smoking in adolescents more consistently than does  
42  
43 smoking by parents.<sup>4</sup> Exposure to smoking in the home, although a less studied factor, has also  
44  
45 been shown to predict smoking in adolescents independent of parental smoking status in  
46  
47 longitudinal and cross sectional studies.<sup>33-37</sup> Studies suggest second hand smoke exposure may  
48  
49 biologically predispose children to nicotine dependence<sup>38-42</sup> in addition to providing pro-  
50  
51 smoking socialization.<sup>34</sup> Could declining exposure to these proximal risk factors explain the  
52  
53 dramatic decline in adolescent smoking since the turn of the century?  
54  
55  
56  
57  
58  
59  
60

1  
2  
3 Despite extensive risk factor research, few studies have explored how exposure to risk factors  
4 has changed over time, or how such changes may be contributing to changes in adolescent  
5 smoking at the population level. The current study explores trends in exposure of 14-15 year  
6 olds to known risk factors for adolescent smoking (parental, sibling and peer smoking and  
7 exposure to smoking in the home) and investigates the extent to which these risk factors could  
8 explain the declining trend in adolescent smoking in NZ from 2003 to 2015.  
9  
10  
11  
12  
13  
14  
15

## 16 **METHODS**

### 17 **Data**

18  
19  
20  
21 We used repeat cross-sectional data from the ASH NZ Year 10 Snapshot Survey series, an  
22 annual school-based survey of 14-15 year olds, which is administered by Action on Smoking  
23 and Health NZ (ASH NZ) and is part of the New Zealand Youth Tobacco Monitor. The  
24 questionnaire includes a set of 'core' questions that have remained consistent over time to  
25 enable trend monitoring, and additional questions which change from year to year. Years  
26 included in the current study were 2002-2015, since key variables of interest were  
27 unavailable prior to 2002. Furthermore, exposure to smoking in the home was not included in  
28 the questionnaire in 2002 or 2004-5, and therefore multivariable trend analysis includes only  
29 data from 2003 and 2006-15.  
30  
31  
32  
33  
34  
35  
36  
37  
38  
39  
40

41  
42 All public and private schools with Year 10 students were invited to participate in the ASH  
43 NZ Year 10 Snapshot each year. Table 1 shows the sample size and student response rate (as  
44 a proportion of the total NZ Year 10 population) by year. Non-response was almost entirely  
45 at the school level, with school response rates ranging from 44-67%.<sup>43</sup> (The lower school  
46 response rate in 2015 was due to limited resources for liaising with schools that year).  
47  
48  
49  
50  
51

52  
53 Following previously published ASH NZ analyses, our analysis was restricted to respondents  
54 aged 14 or 15 at the time of the survey. For consistency between descriptive and  
55  
56  
57

multivariable (i.e. adjusted) analyses, only respondents with complete data for all variables (smoking status, parental smoking, sibling smoking, best friend smoking, age, gender, ethnicity, school decile, and school ID, and for 2003 and 2006-15 exposure to smoking in the home) were included in the analyses. In addition, only schools with at least 20 respondents were included so that results were based on stable estimates of smoking in each school. Table 1 shows the number of valid survey responses received based on the ASH NZ criteria for inclusion (i.e. those with complete data for age (14/15 years), sex, ethnicity and smoking status), and the number included in our study (after exclusions above), by year. After application of our additional inclusion criteria 96% (398,221/ 414,254) of valid responses were included.

*Table 1. Sample size and student response rate by year*

| Year         | NZ Year 10 population | Valid survey responses* | Valid survey responses that met all study inclusion criteria | % Year 10 population that met all study inclusion criteria |
|--------------|-----------------------|-------------------------|--------------------------------------------------------------|------------------------------------------------------------|
| <b>2002</b>  | 58,812                | 29,173                  | 28,088                                                       | 50%                                                        |
| <b>2003</b>  | 61,028                | 32,705                  | 31,377                                                       | 54%                                                        |
| <b>2004</b>  | 62,852                | 31,630                  | 30,807                                                       | 46%                                                        |
| <b>2005</b>  | 64,619                | 32,561                  | 31,833                                                       | 51%                                                        |
| <b>2006</b>  | 63,086                | 32,844                  | 31,690                                                       | 52%                                                        |
| <b>2007</b>  | 62,012                | 25,978                  | 25,109                                                       | 42%                                                        |
| <b>2008</b>  | 61,485                | 30,903                  | 29,682                                                       | 50%                                                        |
| <b>2009</b>  | 61,355                | 25,757                  | 24,755                                                       | 42%                                                        |
| <b>2010</b>  | 61,210                | 32,832                  | 31,696                                                       | 54%                                                        |
| <b>2011</b>  | 59,562                | 26,856                  | 26,028                                                       | 45%                                                        |
| <b>2012</b>  | 59,627                | 31,983                  | 30,396                                                       | 43%                                                        |
| <b>2013</b>  | 57,929                | 28,340                  | 27,014                                                       | 49%                                                        |
| <b>2014</b>  | 59,612                | 31,125                  | 29,303                                                       | 47%                                                        |
| <b>2015</b>  | 59,528                | 21,567                  | 20,443                                                       | 36%                                                        |
| <b>Total</b> | <b>852,717</b>        | <b>414,254</b>          | <b>398,221</b>                                               | <b>47%</b>                                                 |

\*Valid survey responses = those with complete data for age (14 or 15), sex, ethnicity and smoking status

1  
2  
3 The final included sample (N=398, 221) comprised approximately half the Year 10  
4 population each year, and closely resembled the population in respect of demographic  
5 characteristics. A detailed comparison of the final included sample and population, by year, is  
6 provided in a Supplementary Table S1, showing that the sample is broadly representative  
7 albeit with modest but consistent under-representation of Māori and students from low decile  
8 schools. (School decile is a school-level measure of the socio-economic position of a school's  
9 student community, explained further below.<sup>44</sup>)

10  
11  
12  
13  
14  
15  
16  
17  
18 Fieldwork was undertaken earlier in the year in 2011 and subsequently, meaning respondents  
19 were 2-3 months younger on average in 2011 and subsequent years, than in 2010 and prior  
20 years. Excluding the timing of fieldwork and changes to non-core questions, there has been  
21 consistency in survey instruments, administration and data management across included  
22 years.  
23  
24  
25  
26  
27  
28  
29

30 In participating schools, the one-page survey is completed in class time under the supervision  
31 of teaching staff. Individual students may choose not to participate. To protect the  
32 confidentiality of students' responses, identifying information is not collected, and teachers  
33 are requested not to check the completed surveys. Completed surveys are returned to ASH  
34 NZ, which oversees data entry, cleaning and coding.  
35  
36  
37  
38  
39  
40  
41

42 The survey was approved, as a component of the NZ Youth Tobacco Monitor, by the  
43 Ministry of Health Multiregional Health and Disability Ethics Committee in 2007. Further  
44 details on survey methodology are available elsewhere.<sup>43</sup>  
45  
46  
47  
48

## 49 **Variables**

50  
51  
52 The outcome variable, 'regular smoking' (Y/N) was defined as smoking at least monthly,  
53 based on the question 'How often do you smoke now?' The answer categories were: 'I have  
54  
55  
56  
57  
58  
59  
60

1  
2  
3 never smoked/I am not a smoker now'; 'At least once a day'; 'At least once a week'; 'At least  
4  
5 once a month'; and 'Less often than once a month'.

6  
7  
8 Smoking status of mother, father, older sibling(s), and best friend were based on the question  
9  
10 'Which of the following people smoke?' with a dichotomous variable (current smoker,  
11  
12 yes/no) created for each. Previous research shows that maternal smoking is more strongly  
13  
14 associated with adolescent smoking initiation than paternal smoking,<sup>45</sup> therefore we  
15  
16 examined exposure to maternal and paternal smoking separately. For the purposes of  
17  
18 multivariable analysis, parental smoking was grouped into one variable, coded 0 = neither  
19  
20 parent smokes, 1 = only mother smokes, 2 = only father smokes, 3 = both parents smoke.

21  
22  
23  
24 Past week exposure to smoking in the home was based on the question 'During the past 7  
25  
26 days, on how many days have people smoked around you in your home?' Response  
27  
28 categories were 0 days, 1-2 days, 3-4 days, 5-6 days and 7 days. For descriptive analysis  
29  
30 only, we recoded the responses into three categories: 'Daily exposure' (7 days) 'less than  
31  
32 daily exposure' (1-6 days) and 'no exposure' (0 days).

33  
34  
35  
36 In previous research, using the same data set, we confirmed that all the above risk factors  
37  
38 were significantly associated with adolescent smoking, and that these associations remained  
39  
40 significant throughout the study period.<sup>46</sup>

41  
42  
43 Demographic variables were age (14 or 15 years old), sex (male or female), ethnicity  
44  
45 (prioritised Māori, Pacific, Asian, NZ European/other [NZE0]); and school decile. School  
46  
47 decile is calculated by the Ministry of Education for purposes of funding allocation, and is a  
48  
49 school-level measure of the socioeconomic position (SEP) of a school's student community.  
50  
51 Details of how school decile is calculated are available from the Ministry of Education.<sup>44</sup> For  
52  
53 descriptive analysis only, we grouped school decile into low (deciles 1-3: most deprived),  
54  
55  
56  
57  
58  
59  
60



1  
2  
3 medium (4-7), and high (8-10: least deprived). Each school also had an identification number  
4  
5 (school ID) which was assigned to all respondents from that school.  
6  
7

## 8 **Analysis**

9

10 To describe trends we used SPSS (IBM Corp. Released 2016. IBM SPSS Statistics for  
11  
12 Windows, Version 24.0. Armonk, NY: IBM Corp.) to tabulate prevalence of regular smoking  
13  
14 and prevalence of exposure to risk factors (overall and by sex, ethnicity and school decile) for  
15  
16 each year. We then quantified the mean annual absolute change in proportion of respondents  
17  
18 exposed to each risk factor using weighted linear regression (to adjust for differing variance  
19  
20 by year by giving more weight to more accurate estimates of prevalence) with year as the  
21  
22 independent variable. The weights were  $1/SD^2$  of the proportions.  
23  
24  
25

26  
27 Next, for the years 2003 and 2005-2015, we conducted trend analyses based on individual-  
28  
29 level data using multivariable logistic regression. We used SAS/STAT software (Version 9.4  
30  
31 of the SAS system for Windows. Copyright © 2002-2012, SAS Institute Inc., Cary, NC,  
32  
33 USA). To test the extent to which the risk factors of interest accounted for the change over  
34  
35 time in adolescent smoking, we modelled regular smoking as a function of survey year,  
36  
37 adjusting for demographic factors (age, sex, ethnicity and school decile), and including  
38  
39 school ID as a random effect to account for clustering at the school level (Model 1). We then  
40  
41 added the risk factors of interest to Model 1, first individually then collectively. Attenuation  
42  
43 of the odds ratio (OR) for year, which was tested using Z tests to compare log odds, would  
44  
45 indicate that the risk factor (partially) accounted for the trend over time.  
46  
47  
48

49 Initially we modelled the trend using year as a continuous variable, which provided a single  
50  
51 OR describing average annual change in the odds of regular smoking compared with the  
52  
53 reference year, 2003. This approach assumes a linear trend over time, which may not be  
54  
55  
56  
57  
58  
59  
60

1  
2  
3 valid, so we also modelled the trend using year as a categorical variable. This provided an OR  
4  
5 for regular smoking for each survey year 2006-2016, compared with the reference year.  
6

7  
8 To test whether the results were the same for Māori adolescents as for the sample as a whole,  
9  
10 we re-coded ethnicity into Māori (yes/no) and repeated the trend analysis above for Māori  
11  
12 only.  
13

### 14 15 **Patient and Public Involvement**

16  
17  
18 Patients were not involved in the design or conduct of this study, and nor were members of  
19  
20 the general public.  
21  
22

## 23 24 25 **RESULTS**

### 26 27 **Prevalence of regular smoking**

28  
29  
30  
31 There was a long-term decline in prevalence of regular smoking among 14-15 year olds from  
32  
33 22% in 2002 to 5% in 2015 (Figure 1). Based on weighted linear regression, the overall  
34  
35 regular smoking rate reduced by an average of 1.2 % per year (in absolute terms) from 2002-  
36  
37 2015.  
38

39  
40  
41 Supplementary Figures S1, S2 and S3 show trends in prevalence of regular smoking stratified  
42  
43 by ethnicity, school decile and gender, and indicate that smoking has declined in all  
44  
45 demographic groups. Furthermore ethnic, SEP, and gender disparities have narrowed over  
46  
47 time in absolute terms.  
48

### 49 50 **Changes in exposure to risk factors over time**

51  
52  
53 Trends in exposure to risk factors are shown in Figure 1. Parental smoking (Fig 1a) declined  
54  
55 only modestly over the study period with maternal and paternal smoking both declining by an  
56  
57

average rate of 0.5% per annum. As shown in Figure 1b smoking among older siblings declined slightly more, at an average rate of 0.7% per annum, and ‘best friend smokes’ had the highest rate of decline at 1.5% per annum. Past week exposure to smoking in the home did not change significantly over the study period. Prevalence of daily exposure to smoking in the home fell from 22% to 13% overall (an average decrease of 0.6% per annum), however less than daily exposure increased over the study period.

Supplementary Figures S4 to S10 show exposure to risk factors over time by ethnicity and school decile. They show that trends in exposure to risk factors followed a similar pattern in all ethnic and SEP subgroups, but disparities in levels of exposure were marked at all years.

### Trend analyses

Results of the trend analyses are shown in Table 2. We observed a strong downward trend in regular smoking among 14-15 year olds, with an OR of 0.88 per year (95% CI 0.88, 0.88,  $p < .001$ ) based on the linear trend. When ‘best friend smokes’ was added to the model (Model 1 + Best friend smokes) the size of the OR declined significantly (Model 1), indicating that this risk factor partially (but not fully) accounted for the declining trend in adolescent smoking between 2003 and 2015. None of the other risk factors, when added to Model 1, significantly attenuated the OR for year relative to the reference year, indicating that, individually, they did not contribute to the trend.

*Table 2: Results of multiple logistic regression analyses examining the impact of risk factors on the trend in regular smoking in adolescents.*

| Year | Model 1:<br>OR for<br>Year<br>Partially<br>adjusted<br>(95% CI) | Model 1 +<br>Best<br>Friend<br>smokes<br>(95% CI) | Model 1 +<br>Exposure<br>to smoking<br>in home<br>(95% CI) | Model 1 +<br>smoke<br>parent <sup>4</sup> | Model 1 +<br>smoke<br>Sibling | Model 1 +<br>all risk<br>factors |
|------|-----------------------------------------------------------------|---------------------------------------------------|------------------------------------------------------------|-------------------------------------------|-------------------------------|----------------------------------|
| 2003 | 1                                                               |                                                   |                                                            |                                           |                               |                                  |
| 2006 | 0.62                                                            | 0.83*                                             | 0.58                                                       | 0.60                                      | 0.61                          | 0.75*                            |

|                                                                |                         |                          |                         |                         |                         |                          |
|----------------------------------------------------------------|-------------------------|--------------------------|-------------------------|-------------------------|-------------------------|--------------------------|
|                                                                | (0.59,<br>0.64)         | (0.78,<br>0.87)          | (0.55,<br>0.61)         | (0.57,<br>0.63)         | (0.58,<br>0.64)         | (0.71,<br>0.79)          |
| 2007                                                           | 0.56<br>(0.53,<br>0.59) | 0.78*<br>(0.74,<br>0.83) | 0.54<br>(0.52,<br>0.57) | 0.55<br>(0.52,<br>0.58) | 0.56<br>(0.54,<br>0.59) | 0.72*<br>(0.68,<br>0.76) |
| 2008                                                           | 0.51<br>(0.48,<br>0.53) | 0.74*<br>(0.70,<br>0.79) | 0.49<br>(0.47,<br>0.52) | 0.50<br>(0.48,<br>0.53) | 0.51<br>(0.48,<br>0.53) | 0.68*<br>(0.64,<br>0.72) |
| 2009                                                           | 0.47<br>(0.44,<br>0.49) | 0.69*<br>(0.65,<br>0.73) | 0.46<br>(0.43,<br>0.49) | 0.46<br>(0.44,<br>0.49) | 0.47<br>(0.45,<br>0.50) | 0.63*<br>(0.59,<br>0.67) |
| 2010                                                           | 0.40<br>(0.38,<br>0.42) | 0.58*<br>(0.54,<br>0.61) | 0.40<br>(0.38,<br>0.42) | 0.39<br>(0.37,<br>0.41) | 0.40<br>(0.38,<br>0.42) | 0.53*<br>(0.50,<br>0.57) |
| 2011                                                           | 0.36<br>(0.34,<br>0.38) | 0.55*<br>(0.51,<br>0.58) | 0.33<br>(0.31,<br>0.35) | 0.36<br>(0.34,<br>0.38) | 0.37<br>(0.35,<br>0.39) | 0.47*<br>(0.44,<br>0.51) |
| 2012                                                           | 0.28<br>(0.27,<br>0.30) | 0.42*<br>(0.39,<br>0.45) | 0.26<br>(0.25,<br>0.28) | 0.29<br>(0.27,<br>0.30) | 0.29<br>(0.27,<br>0.31) | 0.37*<br>(0.35,<br>0.40) |
| 2013                                                           | 0.27<br>(0.25,<br>0.28) | 0.41*<br>(0.39,<br>0.44) | 0.28<br>(0.26,<br>0.29) | 0.27<br>(0.26,<br>0.29) | 0.28<br>(0.26,<br>0.30) | 0.39*<br>(0.37,<br>0.42) |
| 2014                                                           | 0.24<br>(0.22,<br>0.25) | 0.36*<br>(0.34,<br>0.39) | 0.23<br>(0.22,<br>0.25) | 0.24<br>(0.23,<br>0.26) | 0.25<br>(0.24,<br>0.27) | 0.34*<br>(0.32,<br>0.36) |
| 2015                                                           | 0.21<br>(0.19,<br>0.22) | 0.34*<br>(0.32,<br>0.37) | 0.20<br>(0.19,<br>0.22) | 0.21<br>(0.20,<br>0.23) | 0.22<br>(0.21,<br>0.24) | 0.31*<br>(0.29,<br>0.34) |
| <b>All years combined, using year as a continuous variable</b> |                         |                          |                         |                         |                         |                          |
| Linear trend (2003 - 2015)                                     | 0.88<br>(0.88, 0.88)    | 0.91*<br>(0.91, 0.92)    | 0.88<br>(0.88, 0.88)    | 0.88<br>(0.88, 0.89)    | 0.88<br>(0.88, 0.89)    | 0.91*<br>(0.90, 0.91)    |

Model 1 is adjusted for age, gender, ethnicity and school decile.

\*OR > Model 1 OR ( $p < .05$ )

When all four risk factors were entered into the model together (Model 1+ all risk factors), the attenuation of the OR was significant ( $p < .05$ ) but the magnitude of the change was no greater than for 'Model 1 + Best friend smokes'.

1  
2  
3 The pattern of results described above was observed regardless of whether year was used as a  
4 categorical variable (modelling change relative to 2003 for each year), or a continuous  
5 variable (modelling the linear trend, to give an annual average change over the study period,  
6 as shown in the final row of Table 2). The same patterns were also seen in Māori respondents  
7 (see Supplementary Table S2).  
8  
9  
10  
11  
12

13  
14 There was a residual effect of year (i.e. unexplained change over time indicated by an OR for  
15 year that was significantly less than 1) in all the models, including the fully adjusted model.  
16 This suggests that there were factors outside our fully adjusted model that were influencing  
17 the change over time in smoking prevalence.  
18  
19  
20  
21  
22

## 23 **DISCUSSION**

24  
25 Exposure to best friend smoking declined strongly during the 2002-2015 period, whilst  
26 exposure to other established risk factors for smoking decreased more modestly, if at all.  
27 There was no change in past week exposure to smoking in the home overall (i.e. 1-7 days),  
28 but daily exposure fell significantly, whilst less than daily exposure increased. The primary  
29 aim of the study was to determine whether these known risk factors explained (in statistical  
30 terms) the dramatic decline in adolescent smoking seen recently in NZ. Despite declining  
31 exposure to many of the included risk factors, modelling showed that most of the factors we  
32 explored (parental and sibling smoking, and exposure to smoking in the home) did not  
33 account for the trend in any measurable way, either individually or collectively.  
34  
35  
36  
37  
38  
39  
40  
41  
42  
43  
44  
45

46  
47 Only 'best friend smokes' appeared to contribute to the declining trend in adolescent  
48 smoking. This was unsurprising, given that exposure to this risk factor declined markedly  
49 over the study period, and a previous study using the same data set has shown that the  
50 smoking status of respondents' best friend was by far the strongest risk factor for regular  
51 smoking in NZ 14-15 year olds of the factors we explored,<sup>46</sup> However research on peer  
52  
53  
54  
55  
56  
57

1  
2  
3 influence suggests that causality is likely to be bidirectional, and the association is due, in  
4 part, to smokers seeking out other smokers as friends.<sup>4</sup> Furthermore, at the population level, it  
5 would be a circular to suggest that declining best friend smoking explained the decline in  
6 adolescent smoking, since survey respondents and their best friends belong to the same  
7 cohort of adolescents in which smoking is declining. The question remains: if decreases in  
8 best friend smoking are resulting in reduced risk of adolescent smoking at the individual  
9 level, what is driving the decline in best friend smoking?  
10  
11  
12  
13  
14  
15  
16  
17

18 One possibility is that, since younger adolescents are strongly influenced by peers and  
19 adolescents slightly older than themselves, a virtuous cycle may have developed whereby a  
20 decline in adolescent smoking at time 1 has led to a subsequent decline in adolescent  
21 smoking at time 2 and so on. Further research, perhaps drawing on communicable disease  
22 methodology, could test this hypothesis and explore how the 'social transmission' of smoking  
23 (and other health risk behaviours) influences population prevalence over time. Should this  
24 hypothesis prove to be correct, the trigger for the sudden change from rapidly rising to  
25 rapidly falling adolescent tobacco use from the late 1990s to the early 2000s still remains to  
26 be identified.  
27  
28  
29  
30  
31  
32  
33  
34  
35  
36  
37  
38

39 Our findings suggest that there are other factors influencing the decline in adolescent  
40 smoking that this study did not address. For example, it is possible that changes in the social  
41 meaning of smoking<sup>47 48</sup> and the policy context<sup>11 49</sup> – factors that were not included in our  
42 analyses - may have played a role in triggering adolescent smoking decline. For example,  
43 policy responses to rising adolescent smoking in the 1990s may have influence teen smoking  
44 in NZ, as they appear to have done in Australia,<sup>10 11</sup> the UK<sup>6</sup> and the US.<sup>9</sup> In New Zealand  
45 such policy responses included raising the legal age of tobacco purchase from 16 to 18 years  
46 of age in 1997, a tax increase which raised the price of a packet of 20 cigarettes by 13% in  
47 1998,<sup>50</sup> and the 'Why start?' mass media campaign which ran from 1996-1998. It is plausible  
48  
49  
50  
51  
52  
53  
54  
55  
56  
57  
58  
59  
60

1  
2  
3 that, collectively, these measures contributed to the denormalisation of smoking, which,  
4  
5 together with any specific intervention effects, may have been the trigger for adolescent  
6  
7 smoking decline both in NZ and other jurisdictions. Mass media campaigns from 2000  
8  
9 focusing on second hand smoke and a 2004 ban on smoking in pubs and all other indoor  
10  
11 workplaces likely contributed to the ongoing denormalisation of smoking (in particular indoor  
12  
13 smoking) in NZ,<sup>51</sup> and may underpin the observed decline in daily exposure to smoking in the  
14  
15 home. As Simon Chapman has pointed out, denormalisation involves an ‘interplay of  
16  
17 continuous, uncontrolled, unmeasured, and sometimes unmeasurable variables intended to  
18  
19 influence [tobacco] consumption’, and cannot be reduced to the sum of its parts.<sup>52</sup>  
20  
21

22  
23 However if tobacco denormalisation, along with the other factors discussed above, explains  
24  
25 the decline in adolescent smoking, is it simply a coincidence that adolescent alcohol use, teen  
26  
27 pregnancy and juvenile crime have also declined over the same period? Or does this suggest  
28  
29 there are additional over-arching influences that are impacting on a range of adolescent risk-  
30  
31 taking behaviours?  
32

33  
34 As far as we are aware, this is the first study to explore trends in exposure to known risk  
35  
36 factors with the purpose of better understanding the drivers of the decline in adolescent  
37  
38 smoking prevalence. Definitively establishing the reason(s) for the decline in adolescent  
39  
40 smoking is not possible using repeat cross-sectional data (or indeed via any single study).  
41  
42

43  
44 However, trend analysis using statistical modelling allowed us to explore the relationships  
45  
46 between survey year, risk factors and outcomes, and thereby (potentially) account for changes  
47  
48 over time in statistical terms. This approach has allowed us to rule out hypothesised  
49  
50 explanations for population level change over time, and adds to the evidence base about the  
51  
52 most likely explanations for the decline of smoking in young people.  
53  
54  
55  
56  
57  
58  
59  
60

1  
2  
3 Strengths of the study include the large sample size, and demographic similarity between the  
4 sample and the Year 10 population, suggesting response bias was not a substantial issue.  
5  
6 Systematic under- and over-representation were found to be relatively consistent over time  
7 and therefore unlikely to affect trend analysis, which was the focus of our study. The methods  
8 for the ASH NZ survey were broadly consistent between years, with minor changes (e.g. a  
9 change in fieldwork timing from 2011) unlikely to contribute significantly to the trends  
10 observed. Since there is strong similarity between NZ and other countries at a late stage in  
11 the tobacco epidemic in terms of trends in adolescent smoking and known risk factors, it is  
12 likely that our conclusions may be generalisable to similar countries, but this remains to be  
13 confirmed through further research.  
14  
15

16 Given the complex array of factors at various levels that are known to influence smoking  
17 uptake, one of the limitations of our study was the limited number of risk factors for which  
18 consistent data was available. Clearly, there are other contributing factors, and our study was  
19 unable to explore these. The study was based on self-report questionnaire data, with its  
20 inherent limitations (e.g. potential for social desirability bias, and misinterpretation of  
21 questions resulting in misclassification); however recent biomarker testing of a sub-sample of  
22 ASH NZ Year 10 participants indicated that the survey provides an accurate population  
23 estimate of smoking prevalence.<sup>53</sup> We used school decile as a proxy for SEP, since more  
24 direct measures were unavailable. Because school communities are heterogeneous, it is an  
25 imperfect measure at the individual level, and residual confounding by SEP is possible in our  
26 adjusted analyses.  
27  
28  
29  
30  
31  
32  
33  
34  
35  
36  
37  
38  
39  
40  
41  
42  
43  
44  
45  
46  
47  
48  
49

## 50 **Conclusions**

51 In summary, our findings suggest that the remarkable decline in adolescent smoking in New  
52 Zealand cannot be explained by declining exposure to parental smoking, sibling smoking or  
53 past week exposure to smoking in the home. These factors have not contributed measurably  
54  
55  
56  
57



1  
2  
3 to the trend, either individually or collectively. Declining ‘best friend smoking’ partially  
4  
5 accounts for declining adolescent smoking in our statistical model, but this finding  
6  
7 contributes little to our understanding of the drivers of population level decline since  
8  
9 respondents and their best friends largely come from the same population. It is clear that  
10  
11 factors other than those in our model are at play, with changes in the social meaning of  
12  
13 smoking, the policy context and broader socio-cultural changes all potential contributors.  
14  
15 Further research is needed to identify other contributing factors and determine their relative  
16  
17 importance.  
18  
19  
20  
21  
22  
23

### 24 **Acknowledgements**

25  
26 The authors wish to acknowledge the data owners, ASH New Zealand, for access to the ASH  
27  
28 NZ Year 10 Snapshot Survey data. The ASH Year 10 Snapshot Survey is part of the New  
29  
30 Zealand Youth Tobacco Monitor, a national, school-based survey of young people’s smoking  
31  
32 behaviours, attitudes and associated risk factors.  
33  
34

35 We also thank the advisory group who provided project oversight, feedback, and/or technical  
36  
37 advice. In particular we thank Rob McGee (University of Otago), Sicily Sunseri (Health  
38  
39 Promotion Agency), and Andrew Waa (University of Otago) for feedback on earlier drafts.  
40  
41  
42

### 43 **Contributorship statement**

44  
45 All authors contributed to the conception and design of the study. The analysis was executed  
46  
47 by DS and JB, with oversight by RE. JB drafted the manuscript with input from all authors.  
48  
49

### 50 **Funding**

51  
52  
53 This work was supported by a University of Otago Research Grant 507415.  
54  
55  
56  
57

## Competing interests

None declared.

## Data sharing statement

The data is owned by ASH New Zealand, and cannot be shared by the authors.

## References

1. Ministry of Health. Health Loss in New Zealand 1990-2013: A Report from the New Zealand Burden of Diseases, Injuries and Risk Factors Study. Wellington: Ministry of Health 2016.
2. Blakely T, Fawcett J, Hunt D, et al. What is the contribution of smoking and socioeconomic position to ethnic inequalities in mortality in New Zealand? *Lancet* 2006;368(9529):44-52.
3. David A, Esson K, Perucic A-M, et al. Tobacco use: equity and social determinants. In: E B, Sivasankara Kurup A, eds. Equity, social determinants and public health programmes. Geneva: World Health Organization 2010.
4. Centers for Disease Control. Preventing tobacco use among youth and young adults: A report of the Surgeon General. Atlanta, USA: Centers for Disease Control and Prevention 2012.
5. Action on Smoking and Health. ASH Year 10 Snapshot Survey 2015: Factsheet 1 Topline results. Auckland: ASH New Zealand, 2018.
6. Green MJ, Leyland AH, Sweeting H, et al. Socioeconomic position and early adolescent smoking development: evidence from the British Youth Panel Survey (1994-2008). *Tob Control* 2016;25(2):203-10. doi: 10.1136/tobaccocontrol-2014-051630
7. Action on smoking and Health. ASH Year 10 Snapshot Survey 2015: Factsheet 4 Maori smoking. Auckland, New Zealand: ASH New Zealand, 2018.
8. Ball J, Edwards R, Cook H. Why are today's adolescents less likely to smoke, drink, take drugs or have sex than those in the 1990s? 15th World Congress on Public Health. Melbourne, Australia, 2017.
9. Pampel FC, Aguilar J. Changes in Youth Smoking, 1976-2002: A Time-Series Analysis. *Youth Soc* 2008;39(4):453-79. doi: 10.1177/0044118X07308070
10. White VM, Durkin SJ, Coomber K, et al. What is the role of tobacco control advertising intensity and duration in reducing adolescent smoking prevalence? Findings from 16 years of tobacco control mass media advertising in Australia. *Tob Control* 2015;24(2):198-204. doi: 10.1136/tobaccocontrol-2012-050945
11. White VM, Warne CD, Spittal MJ, et al. What impact have tobacco control policies, cigarette price and tobacco control programme funding had on Australian adolescents' smoking? Findings over a 15-year period. *Addiction* 2011;106(8):1493-502. doi: 10.1111/j.1360-0443.2011.03429.x
12. Charlton A, Bates C. Decline in teenage smoking with rise in mobile phone ownership: hypothesis. *BMJ* 2000;321:1155.
13. Twenge JM. IGen: Why Today's Super-Connected Kids Are Growing Up Less Rebellious, More Tolerant, Less Happy--and Completely Unprepared for Adulthood. New York: Simon and Schuster 2017.
14. Durkee T, Carli V, Floderus B, et al. Pathological Internet Use and Risk-Behaviors among European Adolescents. *Int J Environ Res Public Health* 2016;13(3):294.

15. Gommans R, Stevens GW, Finne E, et al. Frequent electronic media communication with friends is associated with higher adolescent substance use. *Int J Public Health* 2015;60(2):167-77. doi: 10.1007/s00038-014-0624-0
16. Huang GC, Okamoto J, Valente TW, et al. Effects of Media and Social Standing on Smoking Behaviors among Adolescents in China. *Journal of Children and Media* 2012;6(1):100-18. doi: 10.1080/17482798.2011.633411
17. Iannotti RJ, Kogan MD, Janssen I, et al. Patterns of adolescent physical activity, screen-based media use, and positive and negative health indicators in the U.S. and Canada. *J Adolesc Health* 2009;44(5):493-9. doi: 10.1016/j.jadohealth.2008.10.142
18. Koivusilta L, Lintonen T, Rimpela A. Mobile phone use has not replaced smoking in adolescence. *BMJ* 2003;326(7381):161.
19. Koivusilta L, Lintonen T, Rimpelä A. Intensity of mobile phone use and health compromising behaviours—how is information and communication technology connected to health-related lifestyle in adolescence? *Journal of adolescence* 2005;28(1):35-47.
20. Meldrum RC, Clark J. Adolescent virtual time spent socializing with peers, substance use, and delinquency. *Crime & Delinquency* 2015;61(8):1104-26.
21. Morioka H, Itani O, Osaki Y, et al. Association Between Smoking and Problematic Internet Use Among Japanese Adolescents: Large-Scale Nationwide Epidemiological Study. *Cyberpsychol Behav Soc Netw* 2016;19(9):557-61. doi: 10.1089/cyber.2016.0182
22. Osaki Y, Ohida T, Kanda H, et al. Mobile Phone Use does not Discourage Adolescent Smoking in Japan. *Asian Pacific Journal of Cancer Prevention* 2012;13(3):1011-14. doi: 10.7314/apjcp.2012.13.3.1011
23. Steggle N, Jarvis MJ. Do mobile phones replace cigarette smoking among teenagers? *Tob Control* 2003;12(3):339-40.
24. Gauthier AH, Smeeding TM, Furstenberg FF. Are parents investing less time in children? Trends in selected industrialized countries. *Population and development review* 2004;30(4):647-72.
25. Guryan J, Hurst E, Kearney M. Parental Education and Parental Time with Children. *The Journal of Economic Perspectives*, 2008;22(3):23-46.
26. Morman MT, Floyd K. A “changing culture of fatherhood”: Effects on affectionate communication, closeness, and satisfaction in men’s relationships with their fathers and their sons. *Western Journal of Communication* 2002;66(4):395-411. doi: 10.1080/10570310209374746
27. Thapa A, Cohen J, Guffey S, et al. A Review of School Climate Research. *Review of Educational Research* 2013;83(3):357-85. doi: 10.3102/0034654313483907
28. Cornell D, Huang F. Authoritative School Climate and High School Student Risk Behavior: A Cross-sectional Multi-level Analysis of Student Self-Reports. *J Youth Adolesc* 2016;45(11):2246-59. doi: 10.1007/s10964-016-0424-3
29. Jamal F, Fletcher A, Harden A, et al. The school environment and student health: a systematic review and meta-ethnography of qualitative research. *BMC public health* 2013;13(1):798.
30. Settersten Jr RA, Ray B. What’s going on with young people today? The long and twisting path to adulthood. *The future of children* 2010;20(1):19-41.
31. Rea D, Callister P. The changing nature of young people’s transitions in New Zealand. Wellington: Institute of Policy Studies, Victoria University, 2009.
32. Tyas SL, Pederson LL. Psychosocial factors related to adolescent smoking: a critical review of the literature. *Tob Control* 1998;7(4):409-20.
33. Darling H, Reeder A. Is exposure to secondhand tobacco smoke in the home related to daily smoking among youth? *Aust N Z J Public Health* 2003;27(6):655-56.
34. Waa A, Edwards R, Newcombe R, et al. Parental behaviours, but not parental smoking, influence current smoking and smoking susceptibility among 14 and 15 year-old children. *Aust N Z J Public Health* 2011;35(6):530-36.

- 1  
2  
3 35. Becklake MR, Ghezzi H, Ernst P. Childhood predictors of smoking in adolescence: a follow-up  
4 study of Montreal schoolchildren. *CMAJ* 2005;173(4):377-9. doi: 10.1503/cmaj.1041428
- 5 36. Wang MP, Ho SY, Lam TH. Parental smoking, exposure to secondhand smoke at home, and  
6 smoking initiation among young children. *Nicotine Tob Res* 2011;13(9):827-32. doi:  
7 10.1093/ntr/ntr083
- 8 37. Voorhees CC, Ye C, Carter-Pokras O, et al. Peers, tobacco advertising, and secondhand smoke  
9 exposure influences smoking initiation in diverse adolescents. *Am J Health Prom*  
10 2011;25(3):e1-e11.
- 11 38. Selya AS, Dierker LC, Rose JS, et al. Risk factors for adolescent smoking: parental smoking and the  
12 mediating role of nicotine dependence. *Drug Alcohol Depend* 2012;124(3):311-8. doi:  
13 10.1016/j.drugalcdep.2012.02.004
- 14 39. Belanger M, O'Loughlin J, Okoli CT, et al. Nicotine dependence symptoms among young never-  
15 smokers exposed to secondhand tobacco smoke. *Addict Behav* 2008;33(12):1557-63. doi:  
16 10.1016/j.addbeh.2008.07.011
- 17 40. Schuck K, Kleinjan M, Otten R, et al. Responses to environmental smoking in never-smoking  
18 children: can symptoms of nicotine addiction develop in response to environmental tobacco  
19 smoke exposure? *J Psychopharmacol* 2013;27(6):533-40. doi: 10.1177/0269881112466184
- 20 41. Okoli CTC, Kelly T, Hahn EJ. Secondhand smoke and nicotine exposure: A brief review. *Addict*  
21 *Behav* 2007;32(10):1977-88. doi: <http://dx.doi.org/10.1016/j.addbeh.2006.12.024>
- 22 42. Brody AL, Mandelkern MA, London ED, et al. Effect of secondhand smoke on occupancy of  
23 nicotinic acetylcholine receptors in brain. *Arch Gen Psychiatry* 2011;68(9):953-60. doi:  
24 10.1001/archgenpsychiatry.2011.51
- 25 43. Action on Smoking and Health. 2014 ASH Year 10 Snapshot Survey: Information and  
26 methodology. Auckland: Action on Smoking and Health, 2014.
- 27 44. Ministry of Education. School deciles: Ministry of Education; 2017 [Available from:  
28 [https://education.govt.nz/school/running-a-school/resourcing/operational-funding/school-](https://education.govt.nz/school/running-a-school/resourcing/operational-funding/school-decile-ratings/)  
29 [decile-ratings/](https://education.govt.nz/school/running-a-school/resourcing/operational-funding/school-decile-ratings/) accessed 29 June 2017.
- 30 45. Leonardi-Bee J, Jere ML, Britton J. Exposure to parental and sibling smoking and the risk of  
31 smoking uptake in childhood and adolescence: a systematic review and meta-analysis.  
32 *Thorax* 2011;thx. 2010.153379.
- 33 46. Ball J, Sim D, Edwards R. Addressing ethnic disparities in adolescent smoking: Is reducing  
34 exposure to smoking in the home a key? *Nicotine Tob Res* 2018 doi: 10.1093/ntr/nty053  
35 [published Online First: 2018/03/20]
- 36 47. Plumridge EW, Fitzgerald LJ, Abel GM. Performing coolness: smoking refusal and adolescent  
37 identities. *Health Education Research* 2002;17(2):167-79.
- 38 48. Nichter M. Smoking: what does culture have to do with it? *Addiction* 2003;98(s1):139-45.
- 39 49. Dessaix A, Maag A, McKenzie J, et al. Factors influencing reductions in smoking among Australian  
40 adolescents. *Public Health Res Pract* 2016;26(1) doi: 10.17061/phrp2611605
- 41 50. O'Dea D, Thomson G. Report on Tobacco Taxation in New Zealand Volume I. Wellington, New  
42 Zealand, 2007.
- 43 51. Edwards R, Thomson G, Wilson N, et al. After the smoke has cleared: evaluation of the impact of  
44 a new national smoke-free law in New Zealand. *Tob Control* 2008;17(1):e2. doi:  
45 10.1136/tc.2007.020347 [published Online First: 2008/01/26]
- 46 52. Chapman S. Unravelling gossamer with boxing gloves: problems in explaining the decline in  
47 smoking. *British Medical Journal* 2003;307:429-32.
- 48 53. Sunseri S, White J. Class, please spit: using a biochemical validation of self-reported smoking in a  
49 national sample of young people. 13th Behavioural Research in Cancer Control Conference.  
50 Melbourne, Australia: Cancer Council Victoria., 2017.
- 51  
52  
53  
54  
55  
56  
57  
58  
59  
60

Fig 1a. Trends in adolescent and parental smoking prevalence, 2002-2015

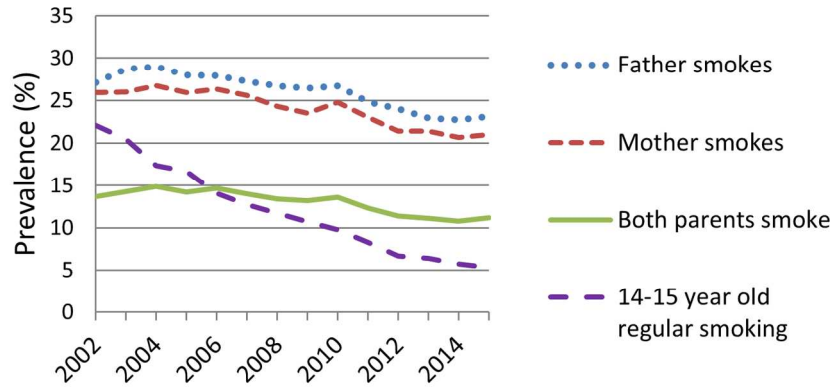

Fig 1b. Trends in exposure to other risk factors, 2002-2015

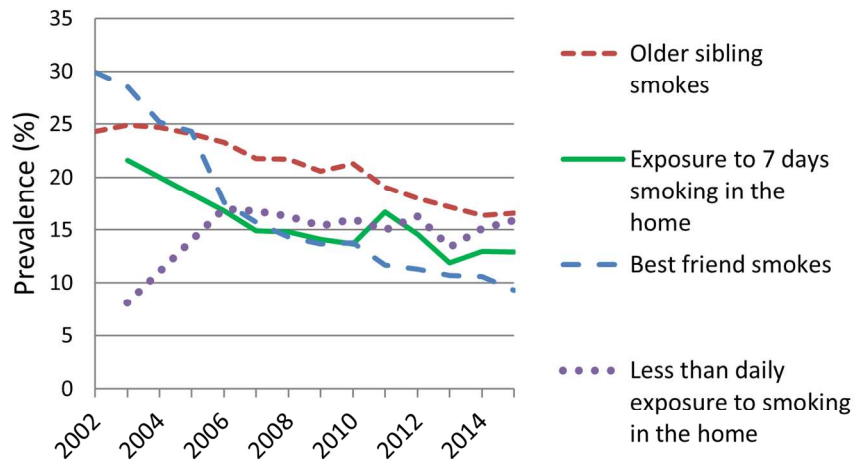

Fig 1: Prevalence of regular smoking and risk factors in 14-15 year olds, 2002 to 2015.

137x178mm (300 x 300 DPI)

1  
2  
3  
4  
5  
6  
7  
8  
9  
10  
11  
12  
13  
14  
15  
16  
17  
18  
19  
20  
21  
22  
23  
24  
25  
26  
27  
28  
29  
30  
31  
32  
33  
34  
35  
36  
37  
38  
39  
40  
41  
42  
43  
44  
45  
46

**SUPPLEMENTARY MATERIAL**

**Characteristics of the sample**

*Supplementary Table S1: Sample characteristics and comparison with Year 10 population (% absolute difference)*

|             |                     | Total | Age      |          | Sex   |        | School Decile |        |       | Ethnicity |       |         |       |
|-------------|---------------------|-------|----------|----------|-------|--------|---------------|--------|-------|-----------|-------|---------|-------|
|             |                     |       | 14 years | 15 years | Male  | Female | Low           | Medium | High  | NZEO      | Maori | Pacific | Asian |
| <b>2002</b> | <b>N</b>            | 28088 | 13161    | 14927    | 13911 | 14177  | 4505          | 13007  | 10576 | 19395     | 4670  | 1833    | 2190  |
|             | <b>%</b>            |       | 47%      | 53%      | 50%   | 50%    | 16%           | 46%    | 38%   | 69%       | 17%   | 7%      | 8%    |
|             | <b>dif from pop</b> |       |          |          | -1%   | 1%     | -4%           | 2%     | 4%    |           |       |         |       |
| <b>2003</b> | <b>N</b>            | 31377 | 14585    | 16792    | 15492 | 15885  | 5272          | 14274  | 11831 | 20716     | 5425  | 2174    | 3062  |
|             | <b>%</b>            |       | 46%      | 54%      | 49%   | 51%    | 17%           | 45%    | 38%   | 66%       | 17%   | 7%      | 10%   |
|             | <b>dif from pop</b> |       |          |          | -2%   | 2%     | -3%           | 3%     | 5%    |           |       |         |       |
| <b>2004</b> | <b>N</b>            | 30807 | 18668    | 12139    | 14996 | 15811  | 5889          | 13373  | 11545 | 19888     | 5694  | 2244    | 2981  |
|             | <b>%</b>            |       | 61%      | 39%      | 49%   | 51%    | 19%           | 43%    | 37%   | 65%       | 18%   | 7%      | 10%   |
|             | <b>dif from pop</b> |       |          |          | -2%   | 2%     | -1%           | 1%     | 4%    |           |       |         |       |
| <b>2005</b> | <b>N</b>            | 31833 | 15901    | 15932    | 15211 | 16622  | 4719          | 15374  | 11740 | 21176     | 5435  | 2172    | 3050  |
|             | <b>%</b>            |       | 50%      | 50%      | 48%   | 52%    | 15%           | 48%    | 37%   | 67%       | 17%   | 7%      | 10%   |
|             | <b>dif from pop</b> |       |          |          | -3%   | 3%     | -3%           | 2%     | 5%    |           |       |         |       |
| <b>2006</b> | <b>N</b>            | 31690 | 19996    | 11694    | 15642 | 16048  | 4416          | 15935  | 11339 | 20161     | 6237  | 2252    | 3040  |
|             | <b>%</b>            |       | 63%      | 37%      | 49%   | 51%    | 14%           | 50%    | 36%   | 64%       | 20%   | 7%      | 10%   |
|             | <b>dif from</b>     |       |          |          | -2%   | 2%     | -4%           | 4%     | 4%    | 2%        | -2%   | -1%     | 1%    |

|             |                     |       |       |       |       |       |      |       |       |       |      |      |      |
|-------------|---------------------|-------|-------|-------|-------|-------|------|-------|-------|-------|------|------|------|
|             | <b>pop</b>          |       |       |       |       |       |      |       |       |       |      |      |      |
| <b>2007</b> | <b>N</b>            | 25109 | 16213 | 8896  | 11988 | 13121 | 3558 | 11062 | 10489 | 16187 | 4653 | 1804 | 2465 |
|             | <b>%</b>            |       | 65%   | 35%   | 48%   | 52%   | 14%  | 44%   | 42%   | 64%   | 19%  | 7%   | 10%  |
|             | <b>dif from pop</b> |       |       |       | -4%   | 4%    | -4%  | -2%   | 10%   | 5%    | -3%  | -2%  | 0%   |
| <b>2008</b> | <b>N</b>            | 29682 | 18395 | 11287 | 14462 | 15220 | 4732 | 12875 | 12075 | 17913 | 5552 | 2863 | 3354 |
|             | <b>%</b>            |       | 62%   | 38%   | 49%   | 51%   | 16%  | 43%   | 41%   | 60%   | 19%  | 10%  | 11%  |
|             | <b>dif from pop</b> |       |       |       | -3%   | 3%    | -2%  | 0%    | 3%    | 1%    | -3%  | 1%   | 1%   |
| <b>2009</b> | <b>N</b>            | 24755 | 15977 | 8778  | 11607 | 13148 | 3235 | 11029 | 10491 | 15410 | 4304 | 2211 | 2830 |
|             | <b>%</b>            |       | 65%   | 35%   | 47%   | 53%   | 13%  | 45%   | 42%   | 62%   | 17%  | 9%   | 11%  |
|             | <b>dif from pop</b> |       |       |       | -4%   | 4%    | -5%  | 1%    | 4%    | 4%    | -5%  | 0%   | 2%   |
| <b>2010</b> | <b>N</b>            | 31696 | 19725 | 11971 | 16636 | 15060 | 5111 | 14049 | 12536 | 18806 | 6315 | 3041 | 3534 |
|             | <b>%</b>            |       | 62%   | 38%   | 52%   | 48%   | 16%  | 44%   | 40%   | 59%   | 20%  | 10%  | 11%  |
|             | <b>dif from pop</b> |       |       |       | 1%    | -1%   | -2%  | 1%    | 2%    | 2%    | -3%  | 0%   | 1%   |
| <b>2011</b> | <b>N</b>            | 26028 | 21390 | 4638  | 12462 | 13566 | 3720 | 10843 | 11465 | 15669 | 4995 | 2453 | 2911 |
|             | <b>%</b>            |       | 82%   | 18%   | 48%   | 52%   | 14%  | 42%   | 44%   | 60%   | 19%  | 9%   | 11%  |
|             | <b>dif from pop</b> |       |       |       | -3%   | 3%    | -4%  | -1%   | 6%    | 3%    | -4%  | 0%   | 0%   |
| <b>2012</b> | <b>N</b>            | 30396 | 25098 | 5298  | 14918 | 15478 | 4982 | 12461 | 12953 | 17878 | 5800 | 3048 | 3670 |
|             | <b>%</b>            |       | 83%   | 17%   | 49%   | 51%   | 16%  | 41%   | 43%   | 59%   | 19%  | 10%  | 12%  |
|             | <b>dif from pop</b> |       |       |       | -2%   | 2%    | -1%  | -2%   | 4%    | 4%    | -3%  | 1%   | 1%   |
| <b>2013</b> | <b>N</b>            | 27014 | 22126 | 4888  | 13546 | 13468 | 4049 | 10875 | 12090 | 16146 | 5111 | 2628 | 3129 |
|             | <b>%</b>            |       | 82%   | 18%   | 50%   | 50%   | 15%  | 40%   | 45%   | 60%   | 19%  | 10%  | 12%  |
|             | <b>dif from pop</b> |       |       |       | -1%   | 1%    | -3%  | -2%   | 5%    | 3%    | -4%  | 0%   | 1%   |
| <b>2014</b> | <b>N</b>            | 29303 | 24206 | 5097  | 14164 | 15139 | 4359 | 12836 | 12108 | 16847 | 5779 | 2952 | 3725 |

|             |              |       |       |      |       |       |      |       |      |       |      |      |      |
|-------------|--------------|-------|-------|------|-------|-------|------|-------|------|-------|------|------|------|
|             | %            |       | 83%   | 17%  | 48%   | 52%   | 15%  | 44%   | 41%  | 57%   | 20%  | 10%  | 13%  |
|             | dif from pop |       |       |      | -3%   | 3%    | -3%  | 2%    | 2%   | 2%    | -4%  | 1%   | 1%   |
| <b>2015</b> | <b>N</b>     | 20443 | 16630 | 3813 | 10155 | 10288 | 3540 | 10024 | 6879 | 12123 | 4215 | 1884 | 2221 |
|             | %            |       | 81%   | 19%  | 50%   | 50%   | 17%  | 49%   | 34%  | 59%   | 21%  | 9%   | 11%  |
|             | dif from pop |       |       |      | -2%   | 2%    | -2%  | 5%    | -2%  | 4%    | -3%  | 0%   | -1%  |

Notes: Population data is based on Ministry of Education (MoE) records which are available online at:

<https://www.educationcounts.govt.nz/statistics/schooling/student-numbers/6028>.

Ethnicity data is not available from MoE prior to 2006, so ethnic comparison of population and sample is not possible 2002-2005.

Comparison between sample and population on age of students (14 or 15 years) is not shown since MoE data is measured at the midpoint in the year, whereas survey fieldwork dates differ slightly from year to year, and as a result meaningful comparison is not possible.



Smoking prevalence by ethnicity, school decile and gender

Supplementary Figure S1: Prevalence of regular smoking in 14-15 year olds by prioritised ethnicity, 2002 to 2015

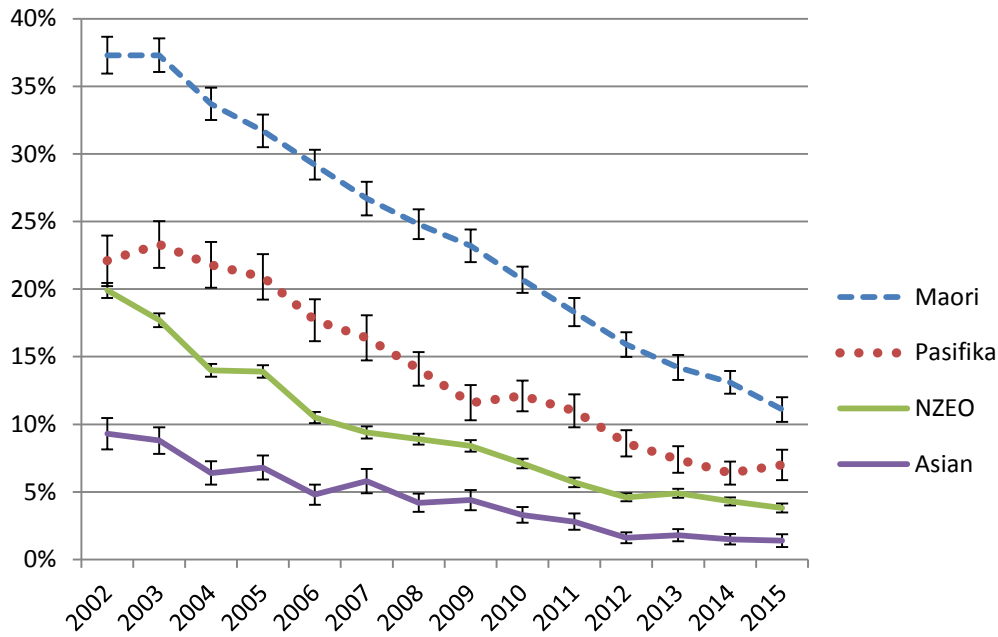

Supplementary Figure S2: Prevalence of regular smoking in 14-15 year olds by school decile, 2002 to 2015

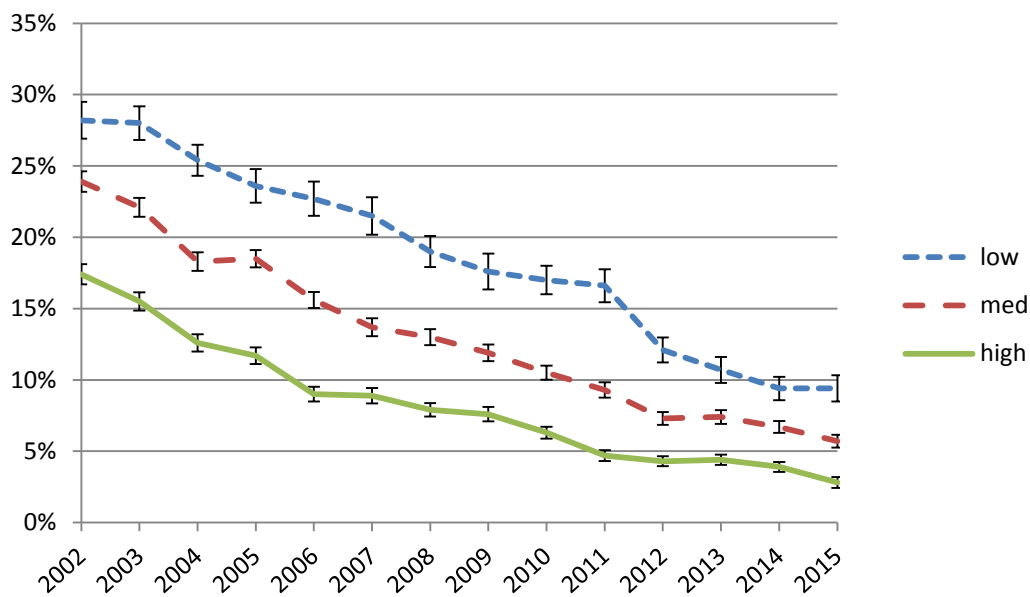

Notes: Low decile = most deprived. High decile = least deprived.

School decile is calculated by the Ministry of Education for purposes of funding allocation, and is a school-level measure of the socioeconomic position of a school's student community. Details of how school decile is calculated are available on the Ministry of Education website:

<https://www.education.govt.nz/school/running-a-school/resourcing/operational-funding/school-decile-ratings/>

Supplementary Figure S3: Prevalence of regular smoking in 14-15 year olds by gender, 2002 to 2015

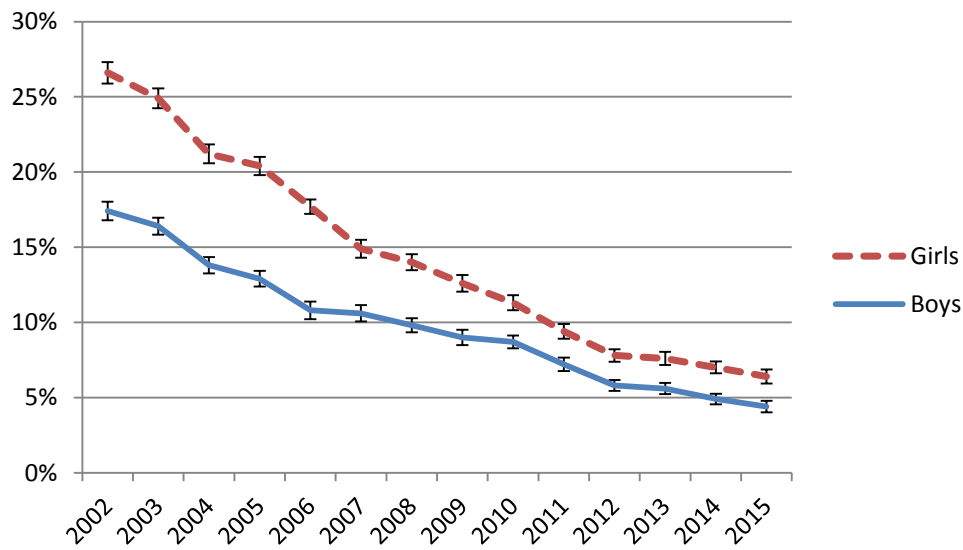

## Changes in exposure to risk factors over time, by ethnicity and school decile

Supplementary Figure S4: Proportion reporting at least one parent smokes by ethnicity, 2002 to 2015

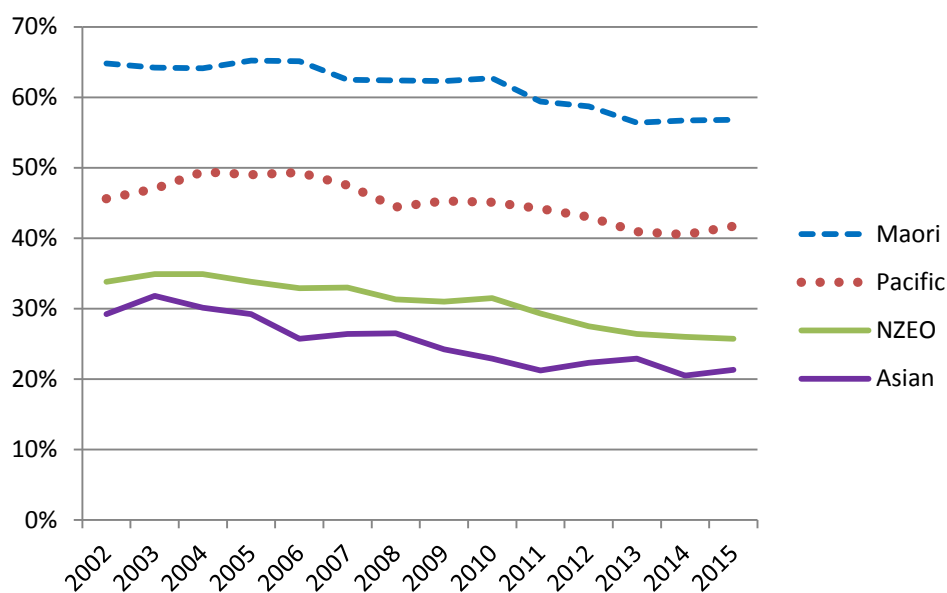

Supplementary Figure S5: Proportion reporting at least one parent smokes by school decile, 2002 to 2015

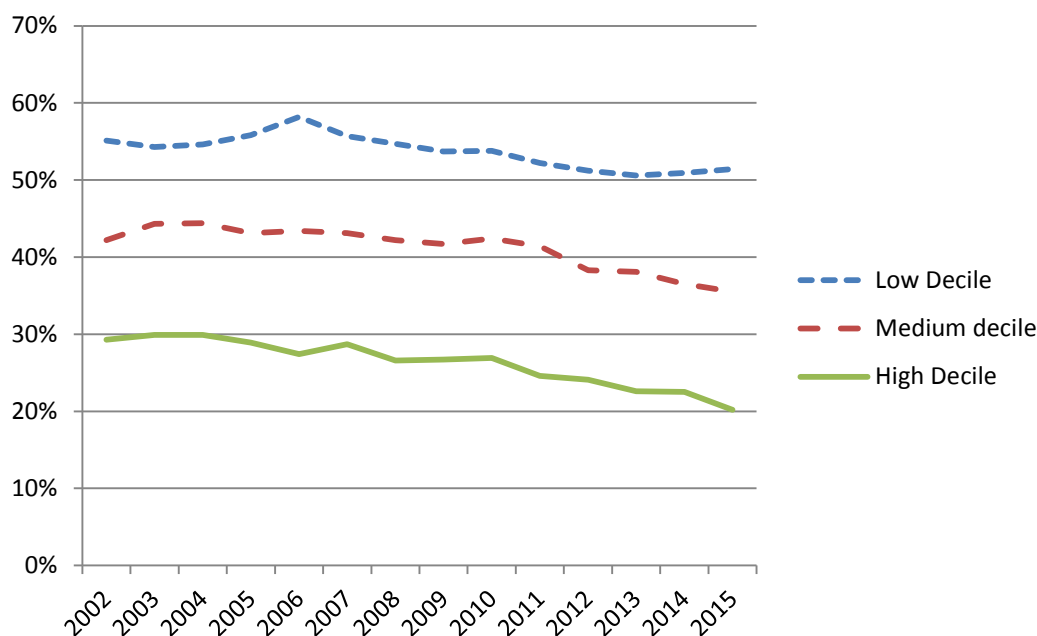

Supplementary Figure S6: Proportion reporting older sibling(s) smoke, by ethnicity, 2002 to 2015.

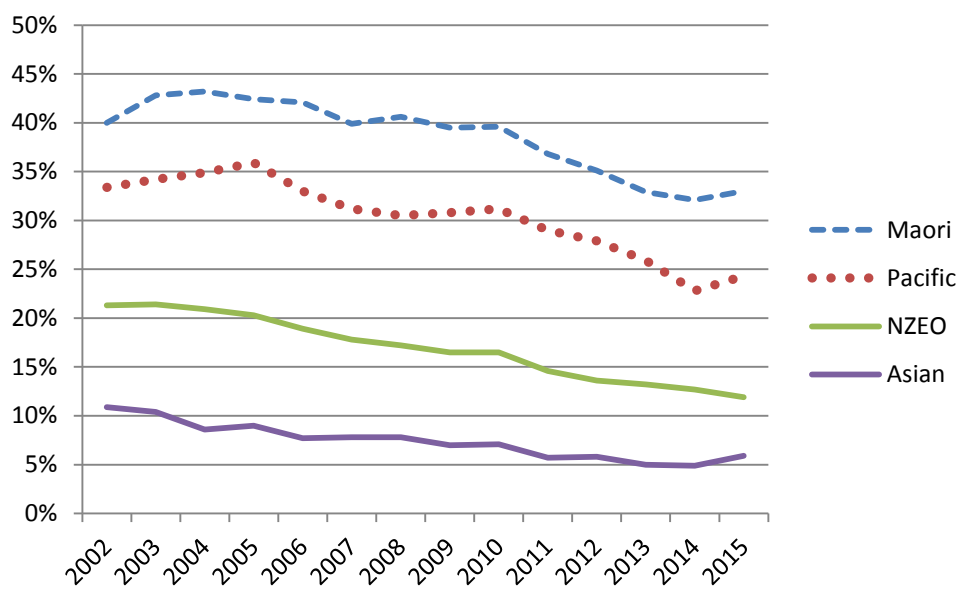

Supplementary Figure S7: Proportion reporting older sibling(s) smoke, by school decile, 2002 to 2015.

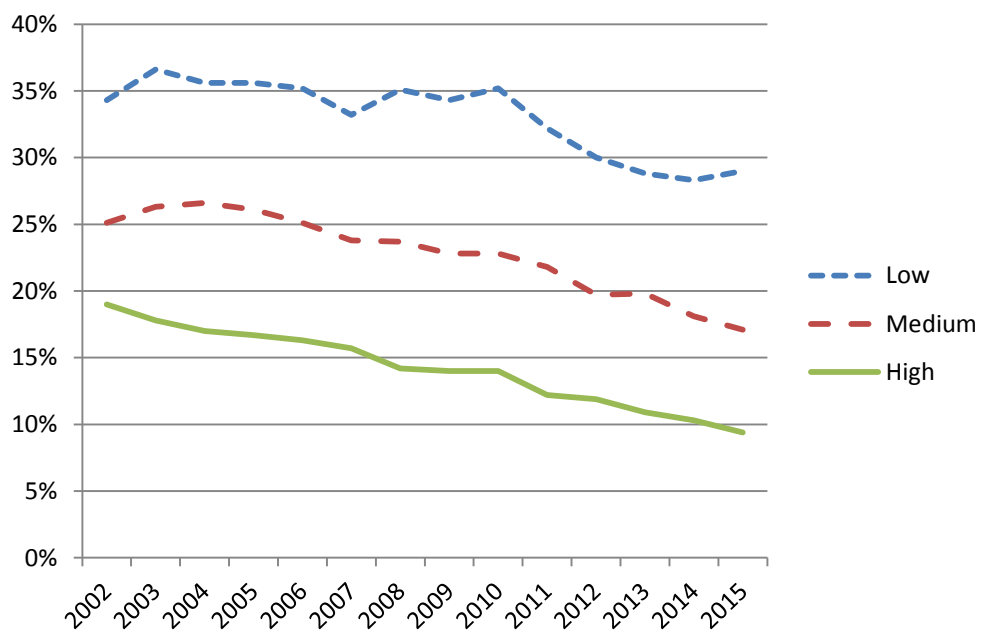

Supplementary Figure S8: Proportion reporting best friend smokes, by ethnicity, 2002 to 2015.

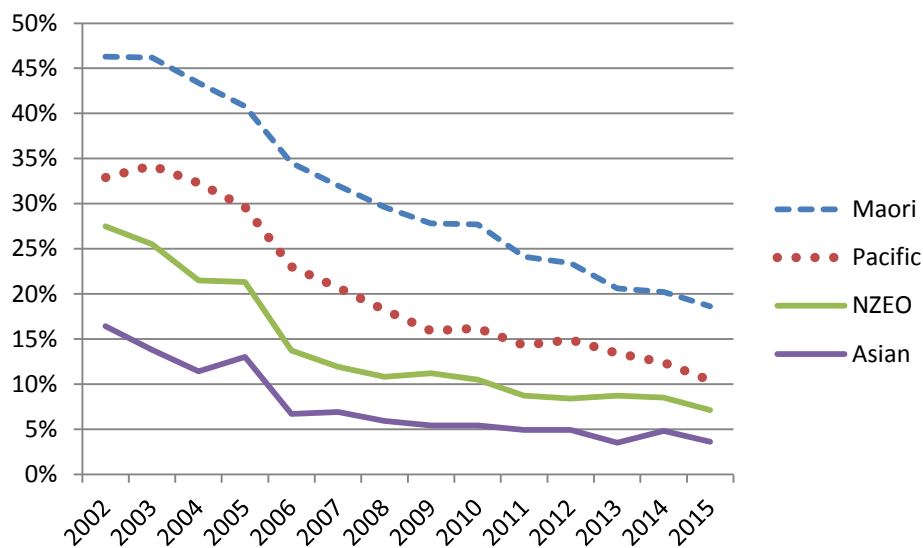

Supplementary Figure S9: Proportion reporting best friend smokes, by school decile, 2002 to 2015.



Supplementary Figure S10: Proportion reporting daily exposure to smoking in the home, by ethnicity, 2002 to 2015.

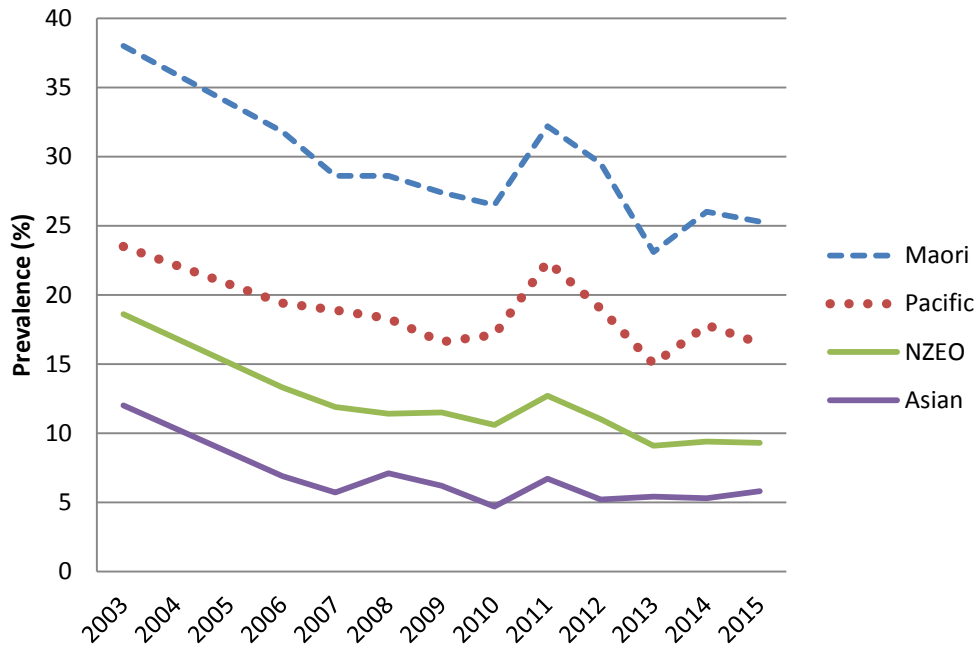

Supplementary Figure S10: Proportion reporting daily exposure to smoking in the home, by school decile, 2002 to 2015.



## Trend analysis for regular smoking in Māori adolescents

To test whether trend analysis results for Māori (indigenous) adolescents differed from those for the adolescent population as a whole, we stratified the sample by ethnicity (Māori/non-Māori) and re-ran our trend analyses on the Māori sub-sample. Table S2 shows ORs for each survey year relative to 2003 (baseline), adjusted for age, gender, and decile (Model 1); then for each named risk factor separately, and finally adjusted for all risk factors together. The final row shows the results for all years combined, with year entered in the model as a continuous variable.

Supplementary Table S2: Trend analyses for Māori sub-sample

| Year                          | Model 1<br>OR for Year,<br>Partially<br>adjusted | Model 1 +<br>Best Friend | Model 1 +<br>smoke in<br>home | Model 1 +<br>smoke<br>parent <sup>4</sup> | Model 1 +<br>smoke<br>Sibling | Model 1 +<br>all risk<br>factors |
|-------------------------------|--------------------------------------------------|--------------------------|-------------------------------|-------------------------------------------|-------------------------------|----------------------------------|
| 2003                          | 1                                                |                          |                               |                                           |                               |                                  |
| 2006                          | 0.73<br>(0.67, 0.79)                             | 0.89*<br>(0.81, 0.97)    | 0.68<br>(0.62, 0.74)          | 0.70<br>(0.65, 0.77)                      | 0.72<br>(0.66, 0.78)          | 0.80<br>(0.73, 0.88)             |
| 2007                          | 0.64<br>(0.58, 0.70)                             | 0.78*<br>(0.71, 0.87)    | 0.61<br>(0.55, 0.67)          | 0.62<br>(0.57, 0.69)                      | 0.63<br>(0.58, 0.70)          | 0.73<br>(0.66, 0.81)             |
| 2008                          | 0.57<br>(0.52, 0.62)                             | 0.75*<br>(0.68, 0.82)    | 0.55<br>(0.49, 0.60)          | 0.56<br>(0.51, 0.61)                      | 0.56<br>(0.51, 0.62)          | 0.69*<br>(0.62, 0.76)            |
| 2009                          | 0.52<br>(0.48, 0.58)                             | 0.70*<br>(0.63, 0.78)    | 0.50<br>(0.46, 0.56)          | 0.51<br>(0.46, 0.56)                      | 0.52<br>(0.47, 0.57)          | 0.65*<br>(0.58, 0.72)            |
| 2010                          | 0.46<br>(0.42, 0.50)                             | 0.59*<br>(0.54, 0.65)    | 0.45<br>(0.41, 0.49)          | 0.45<br>(0.41, 0.49)                      | 0.45<br>(0.41, 0.49)          | 0.55*<br>(0.50, 0.61)            |
| 2011                          | 0.42<br>(0.38, 0.46)                             | 0.58*<br>(0.52, 0.64)    | 0.38<br>(0.34, 0.41)          | 0.42<br>(0.38, 0.46)                      | 0.42<br>(0.38, 0.46)          | 0.51*<br>(0.45, 0.56)            |
| 2012                          | 0.34<br>(0.31, 0.38)                             | 0.47*<br>(0.42, 0.52)    | 0.31<br>(0.28, 0.34)          | 0.34<br>(0.31, 0.38)                      | 0.35<br>(0.31, 0.38)          | 0.42*<br>(0.37, 0.46)            |
| 2013                          | 0.31<br>(0.28, 0.34)                             | 0.44*<br>(0.40, 0.49)    | 0.31<br>(0.28, 0.34)          | 0.31<br>(0.28, 0.34)                      | 0.31<br>(0.28, 0.35)          | 0.42*<br>(0.38, 0.47)            |
| 2014                          | 0.28<br>(0.26, 0.31)                             | 0.40*<br>(0.36, 0.45)    | 0.27<br>(0.24, 0.30)          | 0.29<br>(0.26, 0.32)                      | 0.29<br>(0.26, 0.32)          | 0.37*<br>(0.33, 0.42)            |
| 2015                          | 0.23<br>(0.21, 0.26)                             | 0.34*<br>(0.34, 0.39)    | 0.22<br>(0.19, 0.25)          | 0.23<br>(0.21, 0.26)                      | 0.24<br>(0.21, 0.27)          | 0.32*<br>(0.28, 0.36)            |
| Linear<br>trend 2003-<br>2015 | 0.89<br>(0.88, 0.89)                             | 0.92*<br>(0.91, 0.92)    | 0.89<br>(0.88, 0.89)          | 0.89<br>(0.88, 0.90)                      | 0.89<br>(0.89, 90)            | 0.91*<br>(0.90, 0.92)            |

\*OR > Model 1 OR (p < .01)

STROBE Statement—Checklist of items that should be included in reports of *cross-sectional studies*

|                           | Item No | Recommendation                                                                                                                                                                                    | Page no. |
|---------------------------|---------|---------------------------------------------------------------------------------------------------------------------------------------------------------------------------------------------------|----------|
| <b>Title and abstract</b> | 1       | (a) Indicate the study's design with a commonly used term in the title or the abstract                                                                                                            | 1        |
|                           |         | (b) Provide in the abstract an informative and balanced summary of what was done and what was found                                                                                               | 2        |
| <b>Introduction</b>       |         |                                                                                                                                                                                                   |          |
| Background/rationale      | 2       | Explain the scientific background and rationale for the investigation being reported                                                                                                              | 3-6      |
| Objectives                | 3       | State specific objectives, including any prespecified hypotheses                                                                                                                                  | 6        |
| <b>Methods</b>            |         |                                                                                                                                                                                                   |          |
| Study design              | 4       | Present key elements of study design early in the paper                                                                                                                                           | 6-7      |
| Setting                   | 5       | Describe the setting, locations, and relevant dates, including periods of recruitment, exposure, follow-up, and data collection                                                                   | 6-8      |
| Participants              | 6       | (a) Give the eligibility criteria, and the sources and methods of selection of participants                                                                                                       | 7-8      |
| Variables                 | 7       | Clearly define all outcomes, exposures, predictors, potential confounders, and effect modifiers. Give diagnostic criteria, if applicable                                                          | 9-10     |
| Data sources/ measurement | 8*      | For each variable of interest, give sources of data and details of methods of assessment (measurement). Describe comparability of assessment methods if there is more than one group              | 9-10     |
| Bias                      | 9       | Describe any efforts to address potential sources of bias                                                                                                                                         | NA       |
| Study size                | 10      | Explain how the study size was arrived at                                                                                                                                                         | 7-8      |
| Quantitative variables    | 11      | Explain how quantitative variables were handled in the analyses. If applicable, describe which groupings were chosen and why                                                                      | 9-10     |
| Statistical methods       | 12      | (a) Describe all statistical methods, including those used to control for confounding                                                                                                             | 10-11    |
|                           |         | (b) Describe any methods used to examine subgroups and interactions                                                                                                                               | 10-11    |
|                           |         | (c) Explain how missing data were addressed                                                                                                                                                       | 7        |
|                           |         | (d) If applicable, describe analytical methods taking account of sampling strategy                                                                                                                | 10.      |
|                           |         | (e) Describe any sensitivity analyses                                                                                                                                                             | NA       |
| <b>Results</b>            |         |                                                                                                                                                                                                   |          |
| Participants              | 13*     | (a) Report numbers of individuals at each stage of study—eg numbers potentially eligible, examined for eligibility, confirmed eligible, included in the study, completing follow-up, and analysed | 7-8      |
|                           |         | (b) Give reasons for non-participation at each stage                                                                                                                                              | NA       |
|                           |         | (c) Consider use of a flow diagram                                                                                                                                                                | NA       |
| Descriptive data          | 14*     | (a) Give characteristics of study participants (eg demographic, clinical, social) and information on exposures and potential confounders                                                          | 8+Supl   |
|                           |         | (b) Indicate number of participants with missing data for each variable of interest                                                                                                               | NA       |
| Outcome data              | 15*     | Report numbers of outcome events or summary measures                                                                                                                                              | 11       |



|    |                          |    |                                                                         |
|----|--------------------------|----|-------------------------------------------------------------------------|
| 1  |                          |    |                                                                         |
| 2  | Main results             | 16 | (a) Give unadjusted estimates and, if applicable, confounder-adjusted   |
| 3  |                          |    | estimates and their precision (eg, 95% confidence interval). Make       |
| 4  |                          |    | clear which confounders were adjusted for and why they were             |
| 5  |                          |    | included                                                                |
| 6  |                          |    | 12-15                                                                   |
| 7  |                          |    | (b) Report category boundaries when continuous variables were           |
| 8  |                          |    | categorized                                                             |
| 9  |                          |    | NA                                                                      |
| 10 |                          |    | (c) If relevant, consider translating estimates of relative risk into   |
| 11 |                          |    | absolute risk for a meaningful time period                              |
| 12 | Other analyses           | 17 | Report other analyses done—eg analyses of subgroups and                 |
| 13 |                          |    | interactions, and sensitivity analyses                                  |
| 14 |                          |    | 11-16                                                                   |
| 15 |                          |    | +Suppl                                                                  |
| 16 | <b>Discussion</b>        |    |                                                                         |
| 17 | Key results              | 18 | Summarise key results with reference to study objectives                |
| 18 |                          |    | 13-14                                                                   |
| 19 | Limitations              | 19 | Discuss limitations of the study, taking into account sources of        |
| 20 |                          |    | potential bias or imprecision. Discuss both direction and magnitude     |
| 21 |                          |    | of any potential bias                                                   |
| 22 |                          |    | 16-17                                                                   |
| 23 | Interpretation           | 20 | Give a cautious overall interpretation of results considering           |
| 24 |                          |    | objectives, limitations, multiplicity of analyses, results from similar |
| 25 |                          |    | studies, and other relevant evidence                                    |
| 26 |                          |    | 21                                                                      |
| 27 | Generalisability         | 21 | Discuss the generalisability (external validity) of the study results   |
| 28 |                          |    | 20                                                                      |
| 29 | <b>Other information</b> |    |                                                                         |
| 30 | Funding                  | 22 | Give the source of funding and the role of the funders for the present  |
| 31 |                          |    | study and, if applicable, for the original study on which the present   |
| 32 |                          |    | article is based                                                        |
| 33 |                          |    | 21                                                                      |

\*Give information separately for exposed and unexposed groups.

**Note:** An Explanation and Elaboration article discusses each checklist item and gives methodological background and published examples of transparent reporting. The STROBE checklist is best used in conjunction with this article (freely available on the Web sites of PLoS Medicine at <http://www.plosmedicine.org/>, Annals of Internal Medicine at <http://www.annals.org/>, and Epidemiology at <http://www.epidem.com/>). Information on the STROBE Initiative is available at [www.strobe-statement.org](http://www.strobe-statement.org).
